# Supplementary material for: Nickel-Catalyzed Suzuki Coupling of Phenols Enabled by SuFEx of Tosyl Fluoride
Source: MDPI journal article supplement (doi:10.3390/molecules28020636), 2023-01-07

**Supplementary Materials**  
**For**  
**Nickel-Catalyzed Suzuki Coupling of Phenols Enabled by SuFEx of**  
**Tosyl Fluoride**

Huimin Wang, Shuqin Zhang, Minling Xü, Gang Zou\*

School of Chemistry and Molecular Engineering, East China University of Science and Technology,  
130 Meilong Rd, Shanghai, China

**Table of Contents**

|                                                   |    |
|---------------------------------------------------|----|
| General information.....                          | 2  |
| Characterization data of compounds .....          | 2  |
| References.....                                   | 12 |
| <sup>1</sup> H & <sup>13</sup> C NMR Spectra..... | 13 |

## General information

$^1\text{H}$  and  $^{13}\text{C}$  NMR spectra were recorded in  $\text{CDCl}_3$  or  $\text{Acetone-d}_6$  at ambient temperature on a Bruker DPX-400 spectrometer (Bruker BioSpin GmbH, Germany). Chemical shifts ( $\delta$ ) in NMR are reported in ppm, relative to the internal standard of tetramethylsilane (TMS) or residues of the deuterated solvents. Coupling constants  $J$  are reported in Hz. Proton coupling patterns were described as singlet (s), doublet (d), triplet (t), quartet (q), and multiple (m). High-resolution mass spectra (HRMS) were measured with an Agilent mass spectrometer (HR-TOF-MS, EI).

## Characterization data of compounds

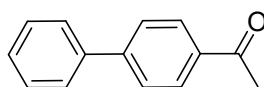

**3aa**

**4-Acetylbiphenyl (3aa)**<sup>1</sup> (0.182g, 93% isolated yield as white solid), M.P. 120-122 °C.  $^1\text{H}$  NMR (400 MHz,  $\text{CDCl}_3$ )  $\delta$  (ppm): 8.02 (d,  $J = 8.4$  Hz, 2H), 7.69 (d,  $J = 8.4$  Hz, 2H), 7.63 (d,  $J = 7.2$  Hz, 2H), 7.48 (t,  $J = 7.2$  Hz, 2H), 7.42 - 7.39 (m, 1H), 2.64 (s, 3H).  $^{13}\text{C}$  NMR (100 MHz,  $\text{CDCl}_3$ )  $\delta$  (ppm): 197.8, 145.8, 139.9, 135.8, 129.0, 129.0, 128.3, 127.3, 127.2, 26.7.

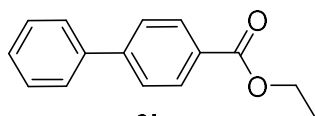

**3ba**

**4-Ethoxycarbonylbiphenyl (3ba)**<sup>2</sup> (0.217g, 96% isolated yield as white solid), M.P. 92-94 °C.  $^1\text{H}$  NMR (400 MHz,  $\text{CDCl}_3$ )  $\delta$  (ppm): 8.13 (d,  $J = 8.4$  Hz, 2H), 7.62 - 7.68 (m, 4H), 7.47 (t,  $J = 7.2$  Hz, 2H), 7.40 (t,  $J = 7.2$  Hz, 1H), 4.41 (q,  $J = 7.2$  Hz, 2H), 1.43 (t,  $J = 7.2$  Hz, 3H).  $^{13}\text{C}$  NMR (100 MHz,  $\text{CDCl}_3$ )  $\delta$  (ppm): 166.6, 145.6, 140.1, 130.1, 129.2, 129.0, 128.1, 127.3, 127.0, 61.0, 14.4.

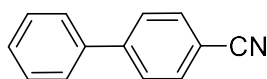

**3ca**

**4-Cyanobiphenyl (3ca)**<sup>3</sup> (0.170g, 95% isolated yield as white solid), M.P. 86-89 °C.  $^1\text{H}$  NMR (400 MHz,  $\text{CDCl}_3$ )  $\delta$  (ppm): 7.73 - 7.67 (m, 4H), 7.61 - 7.58 (m, 2H), 7.51 - 7.41 (m, 3H).  $^{13}\text{C}$  NMR (100 MHz,  $\text{CDCl}_3$ )  $\delta$  (ppm): 145.6, 139.1, 132.6, 129.1, 128.7, 127.7, 127.2, 119.0, 110.9.

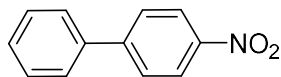

**3da**

**4-Nitrobiphenyl (3da)**<sup>1</sup> (0.089g, 45% isolated yield as yellow solid), M.P. 113-114 °C. <sup>1</sup>H NMR (400 MHz, CDCl<sub>3</sub>) δ (ppm): 8.30 (d, *J* = 8.8 Hz, 2H), 7.74 (d, *J* = 8.8 Hz, 2H), 7.63 (d, *J* = 7.2 Hz, 2H), 7.52 - 7.43 (m, 3H). <sup>13</sup>C NMR (100 MHz, CDCl<sub>3</sub>) δ (ppm): 147.7, 147.1, 138.8, 129.2, 129.0, 127.8, 127.4, 124.1.

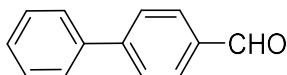

**3ea**

**4-Aldehydebiphenyl (3ea)**<sup>2</sup> (0.091g, 50% isolated yield as yellow solid), M.P. 57-58 °C. <sup>1</sup>H NMR (400 MHz, D<sub>6</sub>-Acetone) δ (ppm): 10.09 (s, 1H), 8.01 (d, *J* = 8.4 Hz, 2H), 7.88 (d, *J* = 8.4 Hz, 2H), 7.75 (d, *J* = 7.2 Hz, 2H), 7.51 (t, *J* = 7.2 Hz, 2H), 7.44 (t, *J* = 7.2 Hz, 1H). <sup>13</sup>C NMR (100 MHz, D<sub>6</sub>-Acetone) δ (ppm): 192.6, 147.6, 140.5, 136.6, 131.0, 130.0, 129.4, 128.5, 128.2.

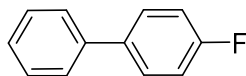

**3fa**

**4-Fluorobiphenyl (3fa)**<sup>4</sup> (0.157g, 91% isolated yield as white solid), M.P. 71-73 °C. <sup>1</sup>H NMR (400 MHz, CDCl<sub>3</sub>) δ (ppm): 7.59 - 7.54 (m, 4H), 7.46 (t, *J* = 7.2 Hz, 2H), 7.39 - 7.35 (m, 1H), 7.17 - 7.13 (m, 2H). <sup>13</sup>C NMR (100 MHz, CDCl<sub>3</sub>) δ (ppm): 163.7, 161.3, 140.3, 137.4 (d, *J* = 3.3 Hz), 128.9, 128.8, 128.7, 127.2, 127.1, 115.6 (d, *J* = 21.3 Hz).

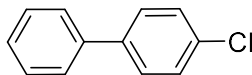

**3ga**

**4-Chlorobiphenyl (3ga)**<sup>4</sup> (0.075g, 40% isolated yield as white solid), M.P. 77-79 °C. <sup>1</sup>H NMR (400 MHz, CDCl<sub>3</sub>) δ (ppm): 7.58 - 7.53 (m, 4H), 7.48 - 7.36 (m, 5H). <sup>13</sup>C NMR (100 MHz, CDCl<sub>3</sub>) δ (ppm): 140.0, 139.7, 133.4, 129.0, 128.9, 128.4, 127.6, 127.0.

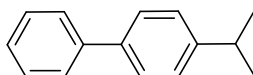

**3ha**

**4-Isopropylbiphenyl (3ha)**<sup>5</sup> (0.082g, 42%; 0.176, 90% isolated yield as colourless oil). <sup>1</sup>H NMR (400 MHz, CDCl<sub>3</sub>)  $\delta$  (ppm): 7.64 (d,  $J$  = 7.2 Hz, 2H), 7.58 (d,  $J$  = 8.4 Hz, 2H), 7.47 (t,  $J$  = 7.6 Hz, 2H), 7.39 - 7.35 (m, 3H), 3.04 - 2.97 (sept,  $J$  = 8.0 Hz, 1H), 1.35 (d,  $J$  = 6.8 Hz, 6H). <sup>13</sup>C NMR (100 MHz, CDCl<sub>3</sub>)  $\delta$  (ppm): 148.0, 141.2, 138.8, 128.8, 127.1, 127.1, 127.1, 126.9, 33.9, 24.1.

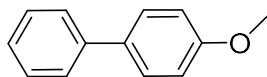

**3ia**

**4-Methoxybiphenyl (3ia)**<sup>1</sup> (0.074g, 40%; 0.166g, 90% isolated yield as white solid), M.P. 88-89 °C. <sup>1</sup>H NMR (400 MHz, CDCl<sub>3</sub>)  $\delta$  (ppm): 7.60 - 7.56 (m, 4H), 7.45 (t,  $J$  = 7.6 Hz, 2H), 7.34 (t,  $J$  = 7.6 Hz, 1H), 7.01 (d,  $J$  = 8.8 Hz, 2H), 3.88 (s, 3H). <sup>13</sup>C NMR (100 MHz, CDCl<sub>3</sub>)  $\delta$  (ppm): 159.2, 140.8, 133.8, 128.8, 128.2, 126.8, 126.7, 114.2, 55.4.

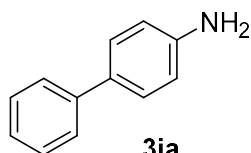

**3ja**

**4-Phenylaniline (3ja)**<sup>3</sup> (0.030, 18% isolated yield as brown solid), M.P. 45-47 °C. <sup>1</sup>H NMR (400 MHz, CDCl<sub>3</sub>)  $\delta$  (ppm): 7.57 (d,  $J$  = 8.4 Hz, 2H), 7.46 - 7.41 (m, 4H), 7.32 - 7.28 (m, 1H), 6.78 (d,  $J$  = 8.4 Hz, 2H), 3.72 (br, 2H). <sup>13</sup>C NMR (100 MHz, CDCl<sub>3</sub>)  $\delta$  (ppm): 145.8, 141.1, 131.4, 128.7, 127.9, 126.4, 126.2, 115.4.

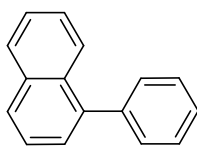

**3ka**

**1-Phenylnaphthalene (3ka)**<sup>6</sup> (0.179g, 88% isolated yield as white solid), M.P. 44-46 °C. <sup>1</sup>H NMR (400 MHz, CDCl<sub>3</sub>)  $\delta$  (ppm): 8.02 - 7.93 (m, 3H), 7.62 - 7.49 (m, 9H). <sup>13</sup>C NMR (100 MHz, CDCl<sub>3</sub>)  $\delta$  (ppm): 140.8, 140.3, 133.8, 131.6, 130.1, 128.3, 127.7, 127.3, 127.0, 126.1, 125.8, 125.4.

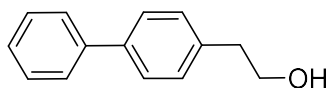

**3la**

**1-Biphenyl-4-ethanol (3la)**<sup>7</sup> (0.146g, 74% isolated yield as white solid), M.P. 93-94 °C. <sup>1</sup>H NMR (400 MHz, CDCl<sub>3</sub>)  $\delta$  (ppm): 7.64 - 7.58 (m, 4H), 7.49 (t,  $J$  = 7.6 Hz, 2H), 7.41 - 7.33 (m, 3H), 3.91 (t,  $J$  = 6.4 Hz, 2H), 2.94 (t,  $J$  = 6.4 Hz, 2H), 2.08 (s, 1H). <sup>13</sup>C NMR (100 MHz, CDCl<sub>3</sub>)  $\delta$  (ppm): 140.9, 139.4, 137.7, 129.4, 128.8, 127.2, 127.1, 127.0, 63.5, 38.8.

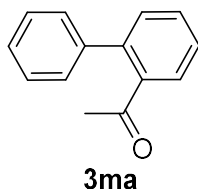

**2-Acetylbiphenyl (3ma)**<sup>1</sup> (0.137g, 70% isolated yield as white solid), M.P. 54-57 °C. <sup>1</sup>H NMR (400 MHz, CDCl<sub>3</sub>)  $\delta$  (ppm): 8.20 (s, 1H), 7.94 (d,  $J$  = 7.6 Hz, 1H), 7.79 (d,  $J$  = 8.0 Hz, 1H), 7.63 (d,  $J$  = 7.6 Hz, 2H), 7.54 (t,  $J$  = 8.0 Hz, 1H), 7.48 (t,  $J$  = 8.0 Hz, 2H), 7.39 (t,  $J$  = 7.2 Hz, 1H), 2.66 (s, 3H). <sup>13</sup>C NMR (100 MHz, CDCl<sub>3</sub>)  $\delta$  (ppm): 198.2, 141.7, 140.2, 137.6, 131.8, 129.1, 128.9, 127.8, 127.2, 127.0, 26.8.

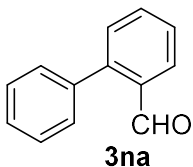

**2-Aldehydebiphenyl (3na)**<sup>8</sup> (0.069g, 38% isolated yield as colourless oil). <sup>1</sup>H NMR (400 MHz, CDCl<sub>3</sub>)  $\delta$  (ppm): 9.99 (s, 1H), 8.04 (dd,  $J$  = 8.0, 1.2 Hz, 1H), 7.64 (td,  $J$  = 7.6, 1.6 Hz, 1H), 7.52 - 7.44 (m, 5H), 7.40 - 7.37 (m, 2H). <sup>13</sup>C NMR (100 MHz, CDCl<sub>3</sub>)  $\delta$  (ppm): 192.5, 146.0, 137.8, 133.7, 133.6, 130.8, 130.1, 128.5, 128.2, 127.8, 127.6.

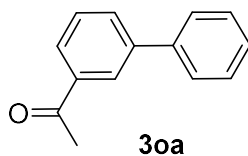

**3-Acetylbiphenyl (3oa)**<sup>1</sup> (0.177g, 90% isolated yield as yellow oil). <sup>1</sup>H NMR (400 MHz, CDCl<sub>3</sub>)  $\delta$  (ppm): 8.19 (t,  $J$  = 1.6 Hz, 1H), 7.94 (dd,  $J$  = 1.6, 8.0 Hz, 1H), 7.80 (dd,  $J$  = 7.6, 1.2 Hz, 1H), 7.62 (d,  $J$  = 7.6 Hz, 2H), 7.54 (t,  $J$  = 7.6 Hz, 1H), 7.48 (t,  $J$  = 8.0 Hz, 2H), 7.39 (t,  $J$  = 7.6 Hz, 1H), 2.66 (s, 3H). <sup>13</sup>C NMR (100 MHz, CDCl<sub>3</sub>)  $\delta$  (ppm): 198.2, 141.8, 140.2, 137.6, 131.8, 129.1, 129.0, 127.9, 127.2, 127.0, 26.8.

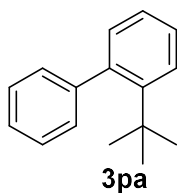

**2-Tert-butylbiphenyl (3pa)**<sup>9</sup> (0.034g, 16%; 0.090g, 43% isolated yield as colourless oil). <sup>1</sup>H NMR (400 MHz, CDCl<sub>3</sub>)  $\delta$  (ppm): 7.65 - 7.58 (m, 4H), 7.52 - 7.45 (m, 4H), 7.38 - 7.34 (m, 1H), 1.41 (s, 9H). <sup>13</sup>C NMR (100 MHz, CDCl<sub>3</sub>)  $\delta$  (ppm): 146.4, 142.2, 141.1, 130.0, 129.4, 128.8, 128.0, 127.7, 127.2, 126.8, 125.6, 125.4, 29.4, 24.4.

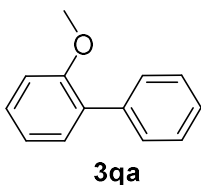

**2-Methoxybiphenyl (3qa)**<sup>8</sup> (0.055g, 30%; 0.120g, 65% isolated yield as colourless oil). <sup>1</sup>H NMR (400 MHz, CDCl<sub>3</sub>)  $\delta$  (ppm): 7.62 - 7.59 (m, 2H), 7.47 (t,  $J$  = 7.5 Hz, 2H), 7.40 - 7.37 (m, 3H), 7.12 - 7.04 (m, 2H), 3.86 (s, 3H). <sup>13</sup>C NMR (100 MHz, CDCl<sub>3</sub>)  $\delta$  (ppm): 156.5, 138.6, 130.9, 129.6, 128.6, 128.0, 127.0, 120.9, 111.3, 55.4.

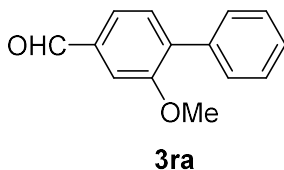

**3-Methoxy-4-phenylbenzaldehyde (3ra)**<sup>10</sup> (0.085g 40%; 0.182g 86% isolated yield as white solid), <sup>1</sup>H NMR (400 MHz, CDCl<sub>3</sub>)  $\delta$  (ppm): 10.02 (s, 1H), 7.57 - 7.53 (m, 3H), 7.51 - 7.39 (m, 5H), 3.90 (s, 3H). <sup>13</sup>C NMR (100 MHz, CDCl<sub>3</sub>)  $\delta$  (ppm): 191.9, 157.1, 137.3, 137.2, 131.4, 129.5, 128.2, 128.0, 124.5, 109.6, 55.8.

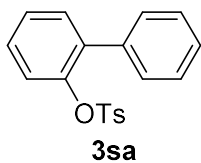

**2-Tosyloxybiphenyl (3sa)** (0.301g, 93% isolated yield as white solid). <sup>1</sup>H NMR (400 MHz, CDCl<sub>3</sub>)  $\delta$  (ppm): 7.52 (d,  $J$  = 8.0 Hz, 1H), 7.40 - 7.34 (m, 2H), 7.28 - 7.26 (m, 4H), 7.20 (d,  $J$  = 8.0 Hz, 2H), 7.15 - 7.13 (m, 2H), 7.67 (d,  $J$  = 8.0 Hz, 2H), 2.37 (s, 3H). <sup>13</sup>C NMR (100 MHz, CDCl<sub>3</sub>)  $\delta$  (ppm): 146.4, 144.6, 136.6, 135.4, 132.0, 131.1, 129.2, 128.6, 128.0, 127.9, 127.4, 127.2, 124.1, 21.6. HRMS (EI-TOF)  $m/z$ : ( $M^+$ ) calcd for C<sub>19</sub>H<sub>16</sub>O<sub>3</sub>S 324.08; found 324.0818.

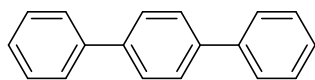

**3ta**

**4-Phenylbiphenyl (3ta)**<sup>11</sup> (0.216g, 94% isolated yield as white solid), M. P. 211-213 °C. <sup>1</sup>H NMR (400 MHz, CDCl<sub>3</sub>)  $\delta$  (ppm):  $\delta$  7.70 - 7.66 (m, 8H), 7.48 (t,  $J$  = 7.6 Hz, 4H), 7.40 - 7.36 (m, 2H). <sup>13</sup>C NMR (100 MHz, CDCl<sub>3</sub>)  $\delta$  (ppm): 140.9, 140.3, 129.0, 127.6, 127.5, 127.2.

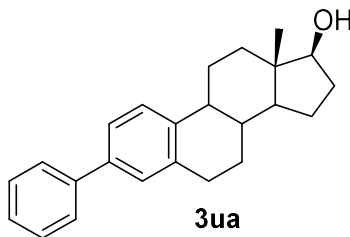

**3ua**

**13-Methyl-3-phenyl-7,8,9,11,12,13,14,15,16,17-decahydro-6H-cyclopenta[a]phenanthren-17-ol (3ua)**<sup>12</sup> (0.056g, 17%; 0.166g, 50% isolated yield as white solid), M. P. 172-173 °C. <sup>1</sup>H NMR (400 MHz, CDCl<sub>3</sub>)  $\delta$  (ppm): 7.60 - 7.58 (m, 2H), 7.45 - 7.39 (m, 4H), 7.35 - 7.31 (m, 2H), 3.76 (t,  $J$  = 8.4 Hz, 1H), 2.97 - 2.94 (m, 2H), 2.44 - 2.37 (m, 1H), 2.34 - 2.27 (m, 1H), 2.19 - 2.10 (m, 1H), 2.02 - 1.92 (m, 2H), 1.78 - 1.70 (m, 1H), 1.63 - 1.47 (m, 4H), 1.42 - 1.36 (m, 2H), 1.34 - 1.30 (m, 1H), 1.27 - 1.20 (m, 1H), 0.81 (s, 3H). <sup>13</sup>C NMR (100 MHz, CDCl<sub>3</sub>)  $\delta$  (ppm): 141.2, 139.6, 138.6, 137.2, 128.7, 127.8, 127.0, 127.0, 125.9, 124.5, 82.0, 50.2, 44.4, 43.3, 38.7, 36.8, 30.6, 29.7, 27.3, 26.2, 23.2, 11.1.

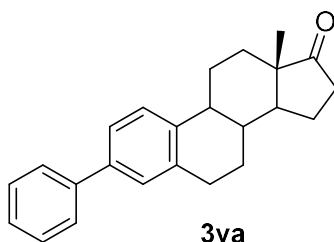

**3va**

**13-Methyl-3-phenyl-6,7,8,9,11,12,13,14,15,16-decahydro-17H-cyclopenta[a]phenanthren-17-one (3va)**<sup>13</sup> (0.132g, 40%; 0.278g, 84% isolated yield as white solid), M. P. 166-168 °C. <sup>1</sup>H NMR (400 MHz, CDCl<sub>3</sub>)  $\delta$  (ppm): 7.60 - 7.58 (m, 2H), 7.45 - 7.39 (m, 4H), 7.35 - 7.32 (m, 2H), 3.01 (dd,  $J$  = 8.8, 4.0 Hz, 2H), 2.57 - 2.46 (m, 2H), 2.40 - 2.34 (m, 1H), 2.21 - 1.98 (m, 4H), 1.71 - 1.50 (m, 6H), 0.94 (s, 3H). <sup>13</sup>C NMR (100 MHz, CDCl<sub>3</sub>)  $\delta$  (ppm): 221.0, 141.0, 138.9, 138.8, 136.9, 128.7, 127.8, 127.1, 127.0,

125.9, 124.6, 50.5, 48.0, 44.4, 38.2, 35.9, 31.6, 29.8, 29.6, 26.6, 25.8, 21.6, 13.9.

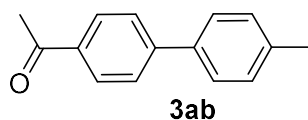

**4-Acetyl-4'-methylbiphenyl (3ab)**<sup>1</sup> (0.200g, 95% isolated yield as white solid), M.P. 118-120 °C. <sup>1</sup>H NMR (400 MHz, CDCl<sub>3</sub>)  $\delta$  (ppm): 8.02 (d,  $J$  = 8.4 Hz, 2H), 7.67 (d,  $J$  = 8.4 Hz, 2H), 7.54 (d,  $J$  = 8.0 Hz, 2H), 7.28 (d,  $J$  = 8.0 Hz, 2H), 2.64 (s, 3H), 2.42 (s, 3H). <sup>13</sup>C NMR (100 MHz, CDCl<sub>3</sub>)  $\delta$  (ppm): 197.8, 145.7, 138.3, 137.0, 135.6, 129.7, 129.0, 127.1, 127.0, 26.7, 21.2.

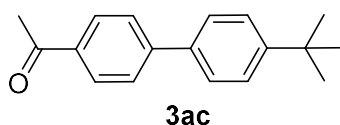

**4-Acetyl-4'-tertiarybutylbiphenyl (3ac)**<sup>3</sup> (0.232g, 92% isolated yield as white solid), M. P. 129-131 °C. <sup>1</sup>H NMR (CDCl<sub>3</sub>, 400 MHz)  $\delta$  (ppm): 8.03 (d,  $J$  = 8.4 Hz, 2H), 7.69 (d,  $J$  = 8.4 Hz, 2H), 7.59 (d,  $J$  = 8.4 Hz, 2H), 7.51 (d,  $J$  = 8.4 Hz, 2H), 2.64 (s, 3H), 1.38 (s, 9H). <sup>13</sup>C NMR (100 MHz, CDCl<sub>3</sub>)  $\delta$  (ppm): 197.9, 151.5, 145.7, 136.9, 135.6, 129.0, 127.0, 127.0, 126.0, 34.7, 31.4, 26.7.

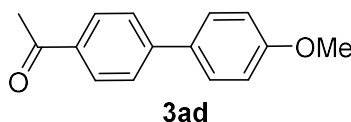

**4-Acetyl-4'-methoxybiphenyl (3ad)**<sup>1</sup> (0.203g, 90% isolated yield as white solid), M.P. 156-158 °C. <sup>1</sup>H NMR (400 MHz, CDCl<sub>3</sub>)  $\delta$  (ppm): 8.00 (d,  $J$  = 8.4 Hz, 2H), 7.64 (d,  $J$  = 8.4 Hz, 2H), 7.58 (d,  $J$  = 8.8 Hz, 2H), 7.00 (d,  $J$  = 8.8 Hz, 2H), 3.86 (s, 3H), 2.62 (s, 3H). <sup>13</sup>C NMR (100 MHz, CDCl<sub>3</sub>)  $\delta$  (ppm): 197.8, 160.0, 145.4, 135.3, 132.3, 129.0, 128.4, 126.6, 114.4, 55.4, 26.7.

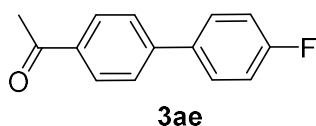

**4-Acetyl-4'-fluorobiphenyl (3ae)**<sup>1</sup> (0.197g, 92% isolated yield as white solid), M.P. 108-109 °C. <sup>1</sup>H NMR (400 MHz, CDCl<sub>3</sub>)  $\delta$  (ppm): 8.02 (d,  $J$  = 8.4 Hz, 2H), 7.64 - 7.57 (m, 4H), 7.15 (t,  $J$  = 8.4 Hz, 2H), 2.63 (s, 3H). <sup>13</sup>C NMR (100 MHz, CDCl<sub>3</sub>)  $\delta$



(ppm): 197.7, 163.0 (d,  $J = 246.0$  Hz), 144.8, 136.1 (d,  $J = 4.0$  Hz), 129.0, 128.9, 127.1, 115.9 (d,  $J = 22.0$  Hz), 26.7.

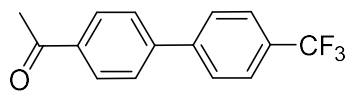

**3af**

**4-Acetyl-4'-trifluoromethylbiphenyl (3af)**<sup>1</sup> (0.196g, 74% isolated yield as white solid), M.P. 122-123 °C. <sup>1</sup>H NMR (CDCl<sub>3</sub>, 400 MHz)  $\delta$  (ppm): 8.06 (d,  $J = 8.4$  Hz, 2H), 7.72 (s, 4 H), 7.69 (d,  $J = 8.4$  Hz, 2H), 2.65 (s, 3H). <sup>13</sup>C NMR (100 MHz, CDCl<sub>3</sub>)  $\delta$  (ppm): 197.7, 144.2, 143.4, 136.6, 130.2 (q,  $J = 32.4$  Hz), 129.8, 129.1, 127.7, 127.5, 125.9 (q,  $J = 3.7$  Hz), 122.8, 26.8.

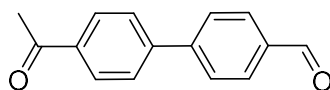

**3ag**

**4-Acetyl-4'-formylbiphenyl (3ag)**<sup>11</sup> (0.179g, 80% isolated yield as white solid), M. P. 145-147 °C. <sup>1</sup>H NMR (400 MHz, CDCl<sub>3</sub>)  $\delta$  (ppm): 10.07 (s, 1H), 8.06 (d,  $J = 8.4$  Hz, 2H), 7.98 (d,  $J = 8.4$  Hz, 2H), 7.78 (d,  $J = 8.0$  Hz, 2H), 7.72 (d,  $J = 8.0$  Hz, 2H), 2.65 (s, 3H). <sup>13</sup>C NMR (100 MHz, CDCl<sub>3</sub>)  $\delta$  (ppm): 197.7, 191.8, 145.7, 144.2, 136.7, 135.8, 130.4, 129.1, 127.9, 127.6, 26.8.

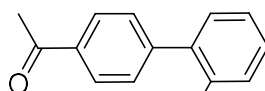

**3ah**

**4-Acetyl-2'-ethylbiphenyl (3ah)**<sup>11</sup> (0.204g, 91% isolated yield as yellow oil). <sup>1</sup>H NMR (CDCl<sub>3</sub>, 400 MHz)  $\delta$  (ppm): 7.90 (d,  $J = 8.0$  Hz, 2H), 7.31 (d,  $J = 8.0$  Hz, 2H), 7.24 - 7.21 (m, 2H), 7.17 - 7.13 (m, 1H), 7.08 (d,  $J = 7.6$  Hz, 1H), 2.54 (s, 3H), 2.48 (q,  $J = 7.6$  Hz, 2H), 0.99 (t,  $J = 7.6$  Hz, 3H). <sup>13</sup>C NMR (100 MHz, CDCl<sub>3</sub>)  $\delta$  (ppm): 198.0, 147.1, 141.5, 140.5, 135.6, 129.7, 129.5, 128.8, 128.2, 128.1, 125.8, 26.7, 26.1, 15.7.

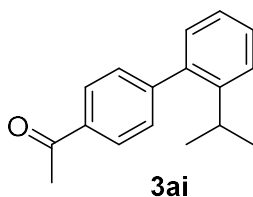

**4-Acetyl-2'-isopropylbiphenyl (3ai)**<sup>14</sup> (0.207g, 87% isolated yield as yellow oil). <sup>1</sup>H NMR (400 MHz, CDCl<sub>3</sub>)  $\delta$  (ppm): 7.94 (d,  $J$  = 8.4 Hz, 2H), 7.36 - 7.28 (m, 4H), 7.18 - 7.14 (m, 1H), 7.10 - 7.07 (m, 1H), 2.93 (sept,  $J$  = 6.8 Hz, 1H), 2.58 (s, 3H), 1.09 (d,  $J$  = 6.8 Hz, 6H). <sup>13</sup>C NMR (100 MHz, CDCl<sub>3</sub>)  $\delta$  (ppm): 197.9, 147.2, 146.2, 139.9, 135.6, 129.6, 129.6, 128.3, 128.2, 125.8, 125.5, 29.5, 26.7, 24.2.

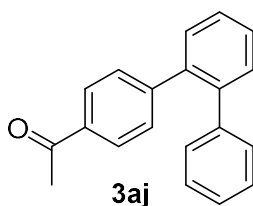

**4-Acetylphenyl-2-phenylbenzene (3aj)**<sup>14</sup> (0.196g, 72% isolated yield as white solid), M. P. 94-95 °C. <sup>1</sup>H NMR (400 MHz, CDCl<sub>3</sub>)  $\delta$  (ppm): 7.72 (d,  $J$  = 8.4 Hz, 2H), 7.37 - 7.34 (m, 4H), 7.16 - 7.12 (m, 5H), 7.05 - 7.03 (m, 2H), 2.48 (s, 3H). <sup>13</sup>C NMR (100 MHz, CDCl<sub>3</sub>)  $\delta$  (ppm): 198.0, 146.7, 141.0, 140.7, 139.4, 135.1, 130.8, 130.4, 130.1, 129.9, 128.2, 128.1, 128.0, 127.7, 126.8, 26.7.

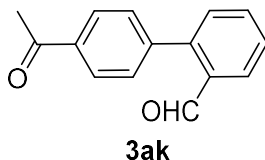

**4-Acetyl-2'-formylbiphenyl (3ak)**<sup>7</sup> (0.152g, 68% isolated yield as white solid), M.P. 89-91 °C. <sup>1</sup>H NMR (400 MHz, CDCl<sub>3</sub>)  $\delta$  (ppm): 9.95 (s, 1H), 8.06 - 8.02 (m, 3H), 7.68 - 7.64 (m, 1H), 7.56 - 7.51 (m, 1H), 7.55 - 7.47 (m, 3H), 2.66 (s, 3H). <sup>13</sup>C NMR (100 MHz, CDCl<sub>3</sub>)  $\delta$  (ppm): 197.6, 191.7, 144.5, 142.6, 136.5, 133.7, 133.6, 130.6, 130.3, 128.5, 128.4, 128.1, 26.8.

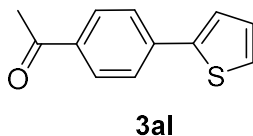

**4-(2'-Thienyl)acetophenone (3al)**<sup>3</sup> (0.160g, 79% isolated yield as yellow solid), M.P. 115-117 °C. <sup>1</sup>H NMR (400 MHz, CDCl<sub>3</sub>)  $\delta$  (ppm): 7.96 (d,  $J$  = 8.4 Hz, 2H), 7.69 (d,  $J$

= 8.4 Hz, 2H), 7.43 (d,  $J$  = 3.6 Hz, 1H), 7.37 (d,  $J$  = 4.8 Hz, 1H), 7.13 - 7.11 (m, 1H), 2.61 (s, 3H).  $^{13}\text{C}$  NMR (100 MHz,  $\text{CDCl}_3$ )  $\delta$  (ppm): 197.4, 143.0, 138.8, 135.8, 129.1, 128.4, 126.5, 125.7, 124.6, 26.6.

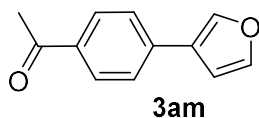

**4-(3'-Furyl)acetophenone (3am)**<sup>11</sup> (0.140g, 75% isolated yield as white solid), M.P. 83-85 °C.  $^1\text{H}$  NMR (400 MHz,  $\text{CDCl}_3$ )  $\delta$  (ppm): 7.96 (d,  $J$  = 8.4 Hz, 2H), 7.82 (s, 1H), 7.56 (d,  $J$  = 8.4 Hz, 2H), 7.51 - 7.50 (m, 1H), 6.74 (d,  $J$  = 0.9 Hz, 1H), 2.61 (s, 3H).  $^{13}\text{C}$  NMR (100 MHz,  $\text{CDCl}_3$ )  $\delta$  (ppm): 197.5, 144.2, 139.7, 137.2, 135.6, 129.1, 125.8, 108.6, 26.5.

## References

1. Ren, C.; Zeng, J.S.; Zou, G. Nickel-catalyzed cross-coupling of O, N-chelated diarylborinates with aryl chlorides and mesylates. *New J. Chem.* **2019**, *43*, 1589-1596.
2. Zhang, G. Efficient Protocol for the Phosphine-Free Suzuki-miyaura reaction catalyzed by palladium on carbon at room temperature. *Synthesis*. **2005**, *4*, 537-542.
3. Chen, L.S.; Lang, H. Y.; Fang, L.; Zhu, M.Y.; Liu, J. Q.; Yu, J.J.; Wang, L.M. Nickel-catalyzed one-Pot suzuki-miyaura cross-coupling of phenols and arylboronic acids mediated by N,N-ditosylaniline. *Eur. J. Org. Chem.* **2014**, 4953-4957.
4. Xu, T.F.; Lu, P.; Wohlrab, S.; Chen, W.X.; Springer, A.; Wu, X.F.; Lu, W.Y. In situ grown palladium nanoparticles on polyester fabric as easy-separable and recyclable catalyst for suzuki-miyaura reaction. *Cat. Commun.* **2021**, *157*, 106328-106333.
5. Schmidt, A.; Rahimia, A. A versatile catalyst system for suzuki-miyaura syntheses of sterically hindered biaryls employing a cyclobutene-1,2-bis(imidazolium)salt. *Chem. Commun.* **2010**, *46*, 2995-2997.
6. Zhang, D.L.; Wu, F.S.; Wan, Z.J.; Wang, Y.C.; He, X.; Guo, B.; You, H.Z.; Chen, F.E. A palladium polyaniline complex: a simple and efficient catalyst for batch and flow suzuki-miyaura cross-couplings. *Chem. Commun.* **2022**, *58*, 10845-10848.
7. Woolard, K.J.; Sandala, J.L.; Melander, R.J.; Gunn, J. S. Melander, C.; Development of small molecules that work cooperatively with ciprofloxacin to clear salmonella biofilms in a chronic gallbladder carriage model. *Eur. J. Med. Chem.* **2022**, *232*, 114203-114211.
8. Zhang, L.Y.; Long, S.Y.; Jiao, H. B.; Liu, Z.Y.; Zhang, P.; Lei, A.W.; Gong, W.; Pei, X.L. Cellulose derived Pd nano-catalyst for efficient catalysis. *RSC Adv.* **2022**, *12*, 18676-18684.
9. Watson, M.B.; Rath, N.P.; Mirica, L.M. Oxidative C-C bond formation reactivity of organometallic Ni(II), Ni(III), and Ni(IV) complexes. *J. Am. Chem. Soc.* **2017**, *139*, 35-38.
10. Ohgi, A.; Semba, K.; Hiyama, T.; Nakao, Y. Silicon-based cross-coupling of aryl tosylates by cooperative palladium/copper catalysis. *Chem. Lett.* **2016**, *45*, 973-975.
11. Guo, D.S.; Shi, W.J.; Zou, G. Suzuki coupling of activated aryltriazenes for practical synthesis of biaryls from anilines. *Adv. Synth. Catal.* **2022**, *364*, 2438-2442.
12. Rühl, P.; Rosato, A.S.; Urban, N.; Gerndt, S.; Tang, R. Abrahamian, C.; Leser, C.; Sheng, J.S.; Jha, A.; Vollmer, G.; Schaefer, M.; Bracher, F.; Grimm, C. Estradiol analogs attenuate autophagy, cell migration and invasion by direct and selective inhibition of trpml1, independent of estrogen receptors. *Scientific Reports*. **2021**, *11*, 8313-8326.
13. Song, C.I.; Dong, X.; Wang, Z.J.; Liu, K.; Chiang, C.W.; Lei, A. Visible-light induced [4+2] annulation of thiophenes and alkynes to construct benzene rings. *Angew. Chem., Int. Ed.* **2019**, *58*, 12206-12210.
14. Hagiwara, H.; Sato, K.; Hoshi, T.; Suzuki, T.; A highly sustainable and active catalyst for suzuki-miyaura reaction: palladium-supported ionic liquid catalyst (SILC) coated with polymer. *Synlett*. **2011**, *17*, 2545-2550.

# <sup>1</sup>H and <sup>13</sup>C NMR spectra of the biphenyl compounds

## 4-Acetylbiphenyl 3aa

### <sup>1</sup>H NMR

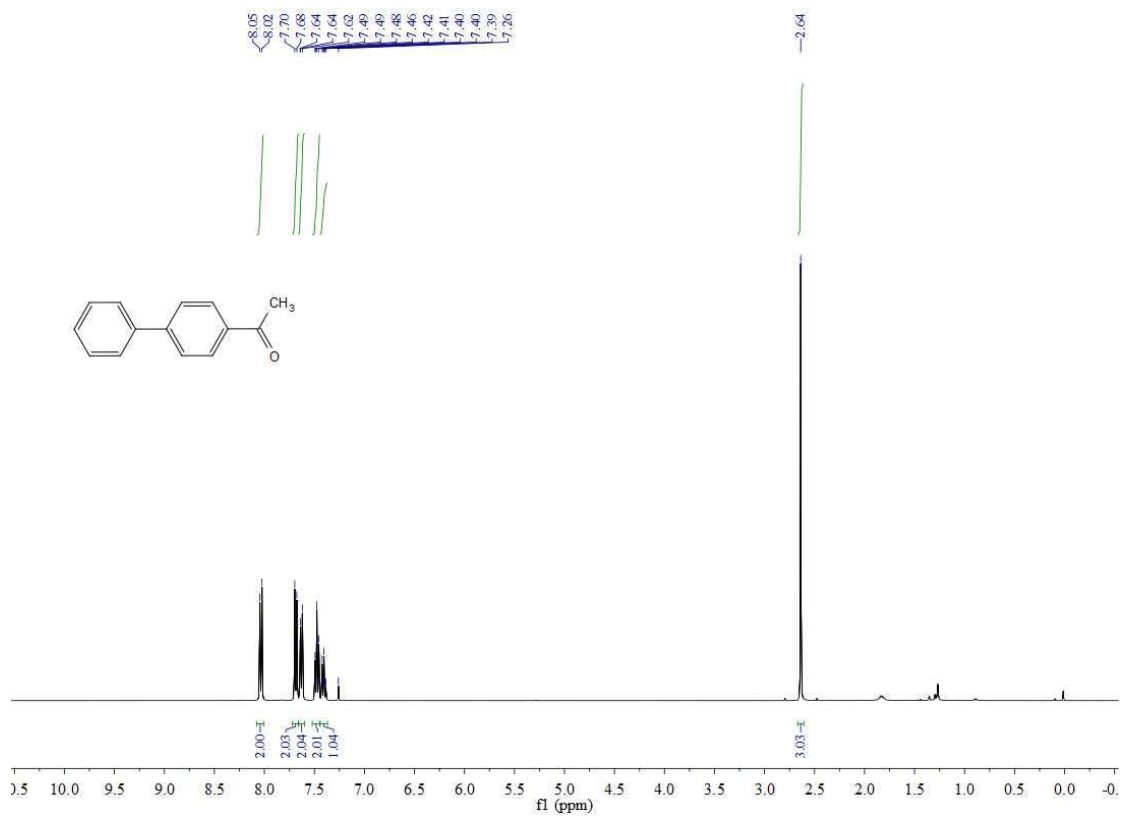

### <sup>13</sup>C NMR

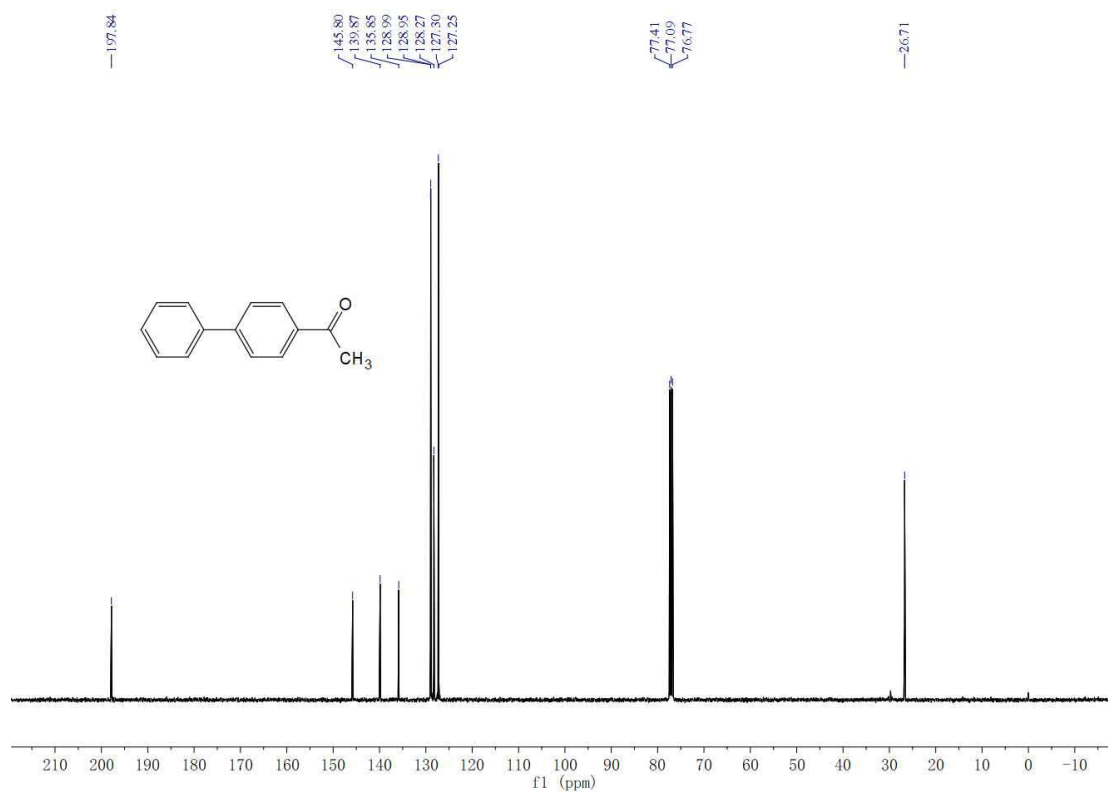

# 4-Ethoxycarbonylbiphenyl 3ba

## <sup>1</sup>H NMR

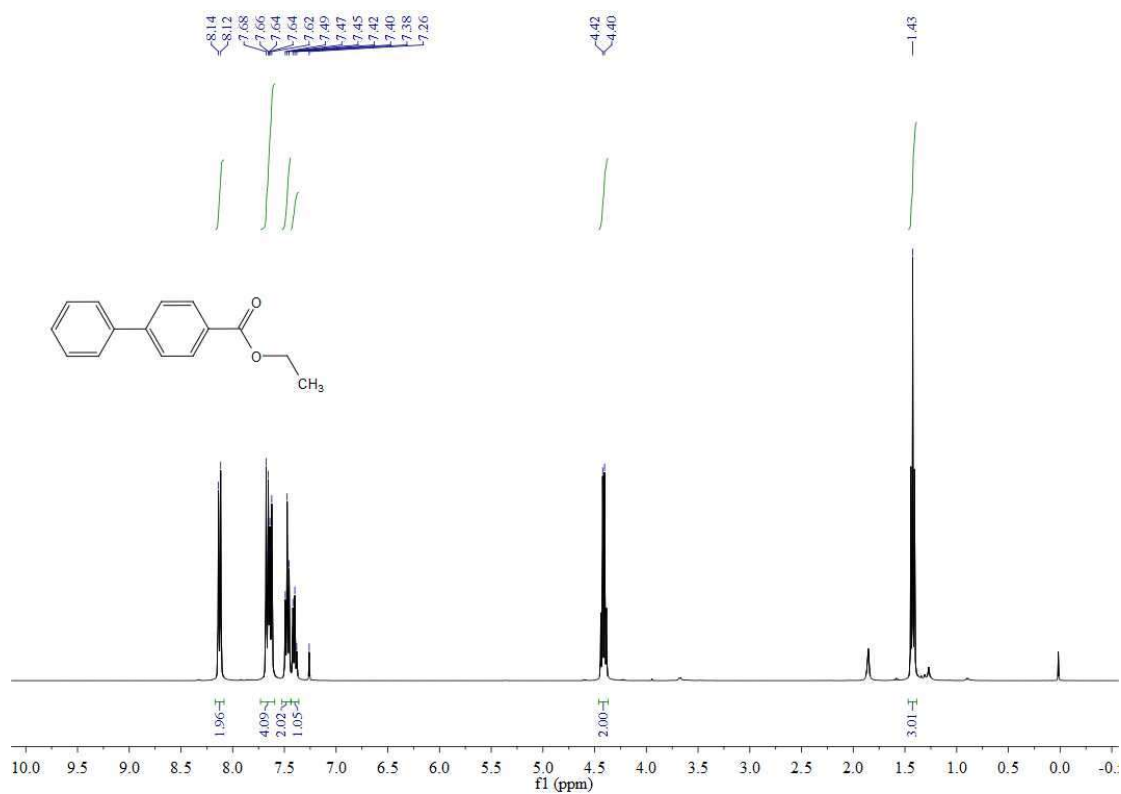

## <sup>13</sup>C NMR

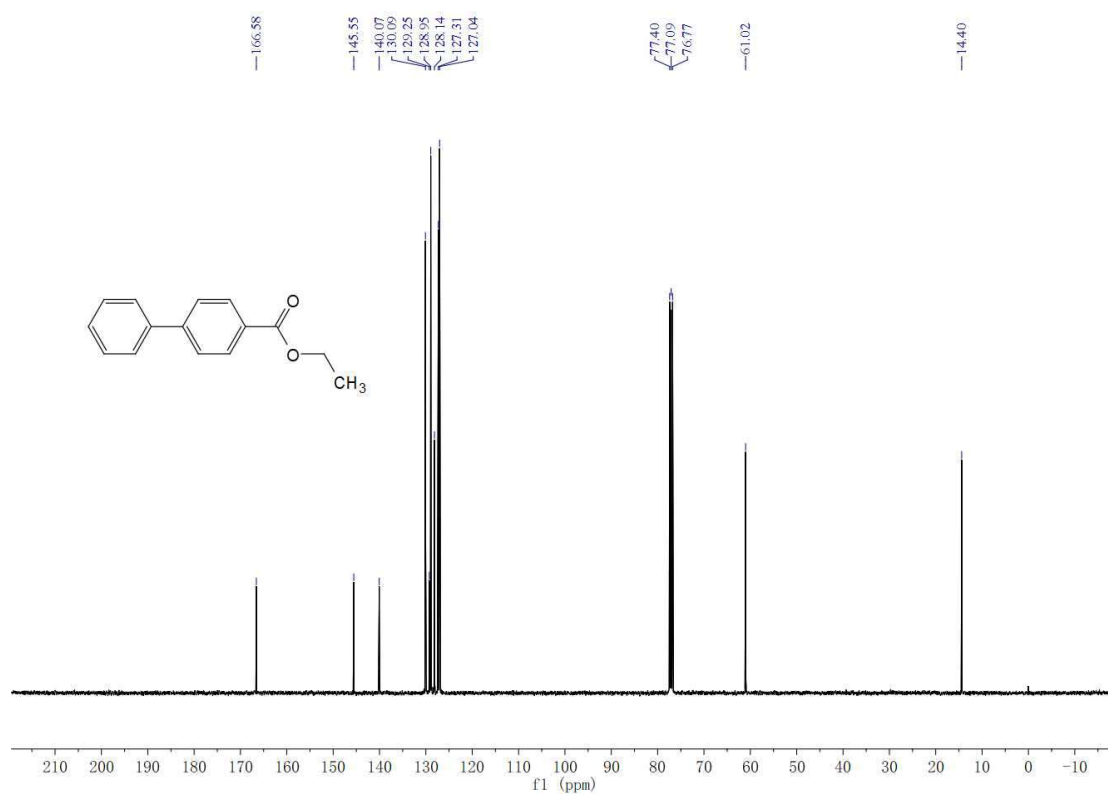

# 4-Cyanobiphenyl 3ca

## <sup>1</sup>H NMR

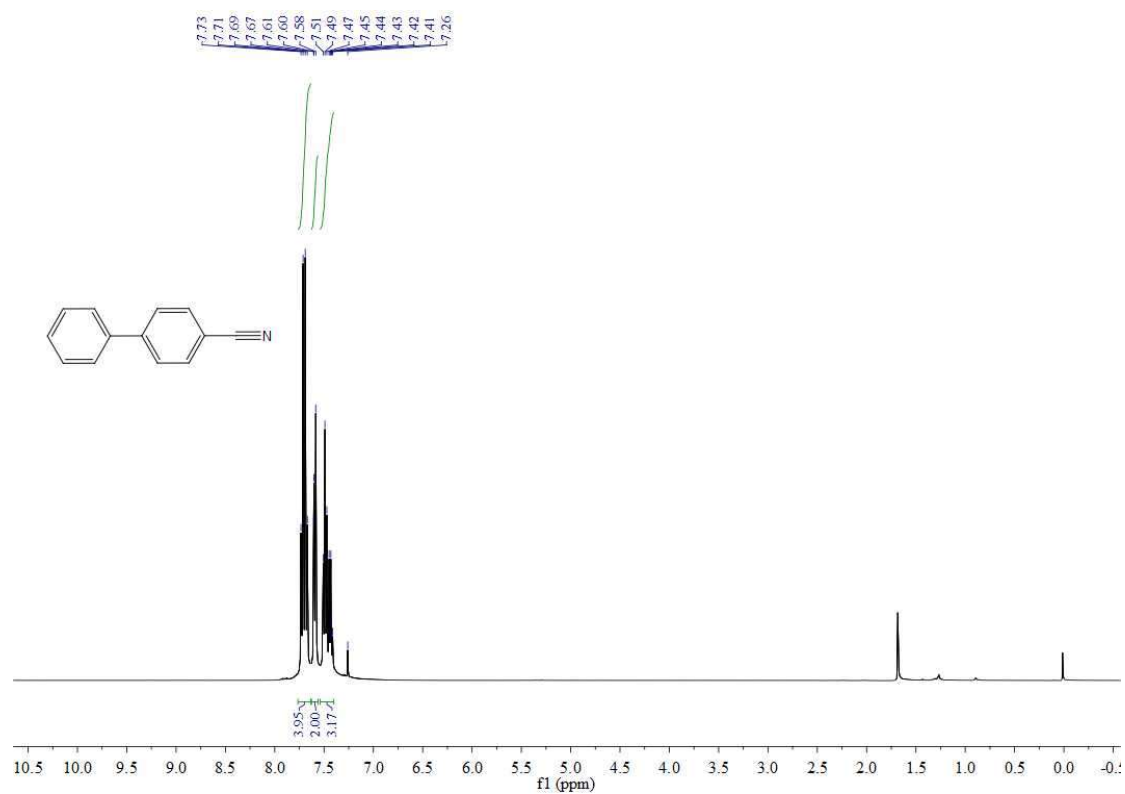

## <sup>13</sup>C NMR

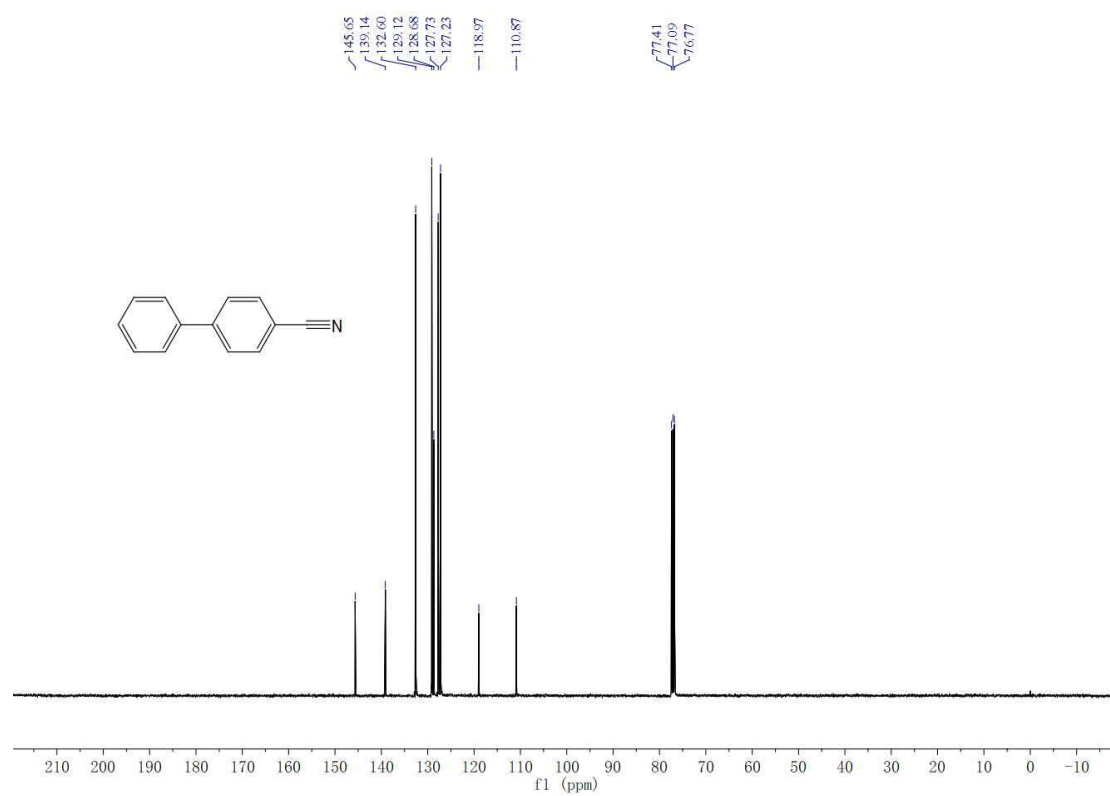

# 4-Nitrobiphenyl 3da

## <sup>1</sup>H NMR

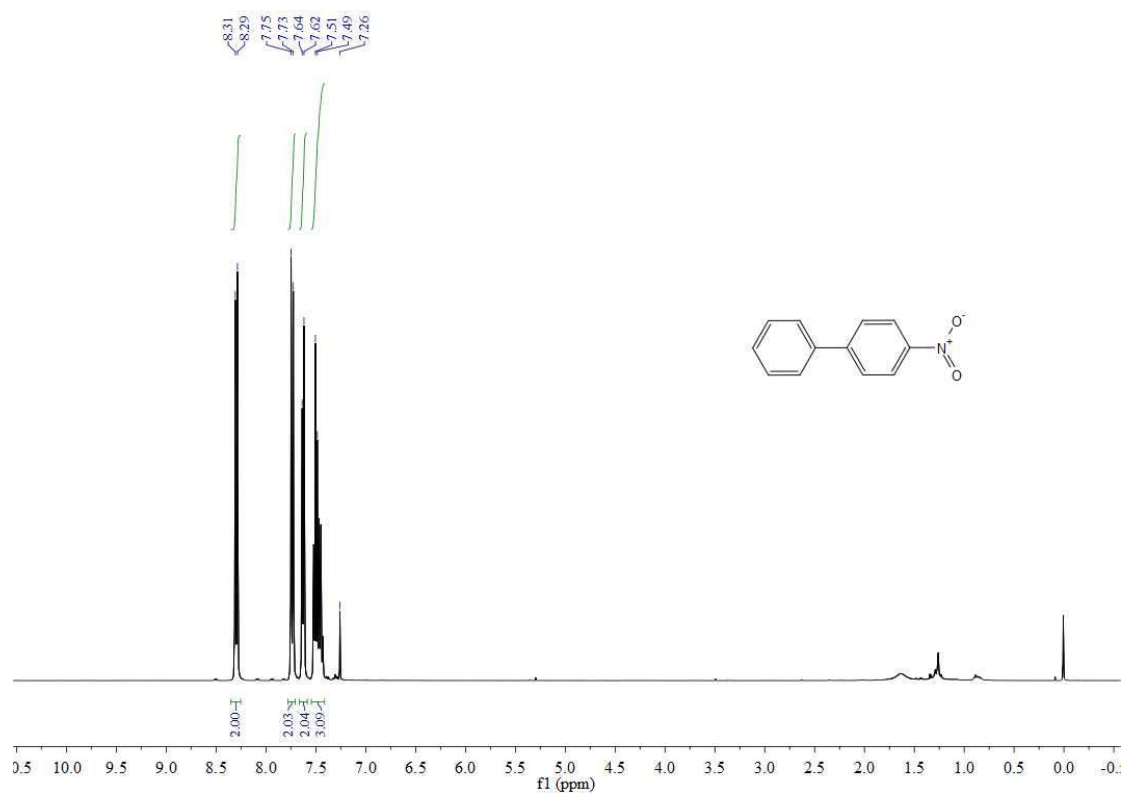

## <sup>13</sup>C NMR

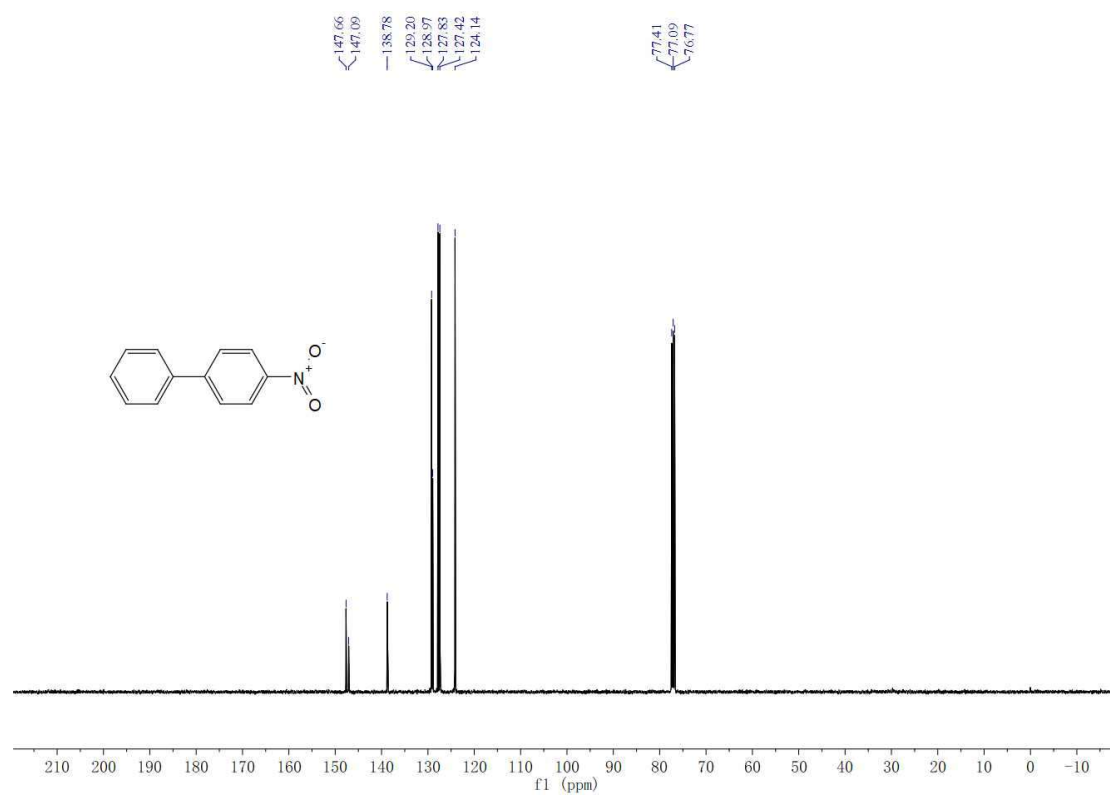



# 4-Aldehydebiphenyl 3ea

## <sup>1</sup>H NMR

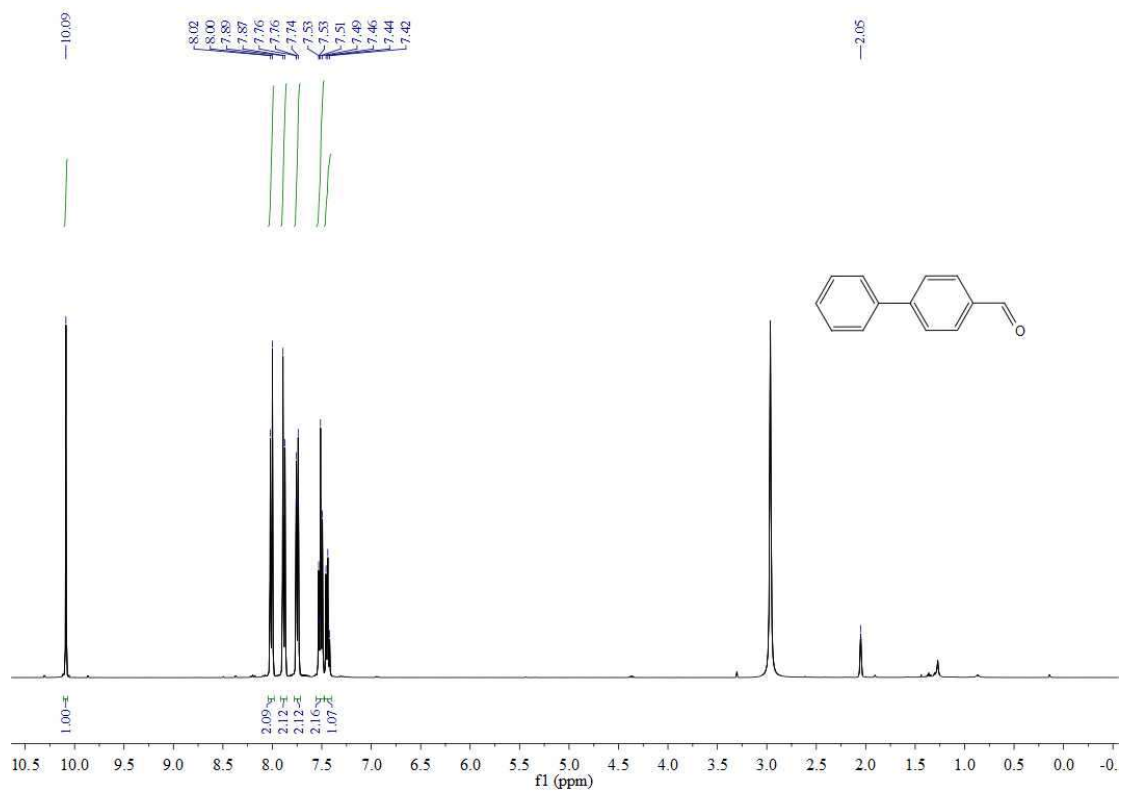

## <sup>13</sup>C NMR

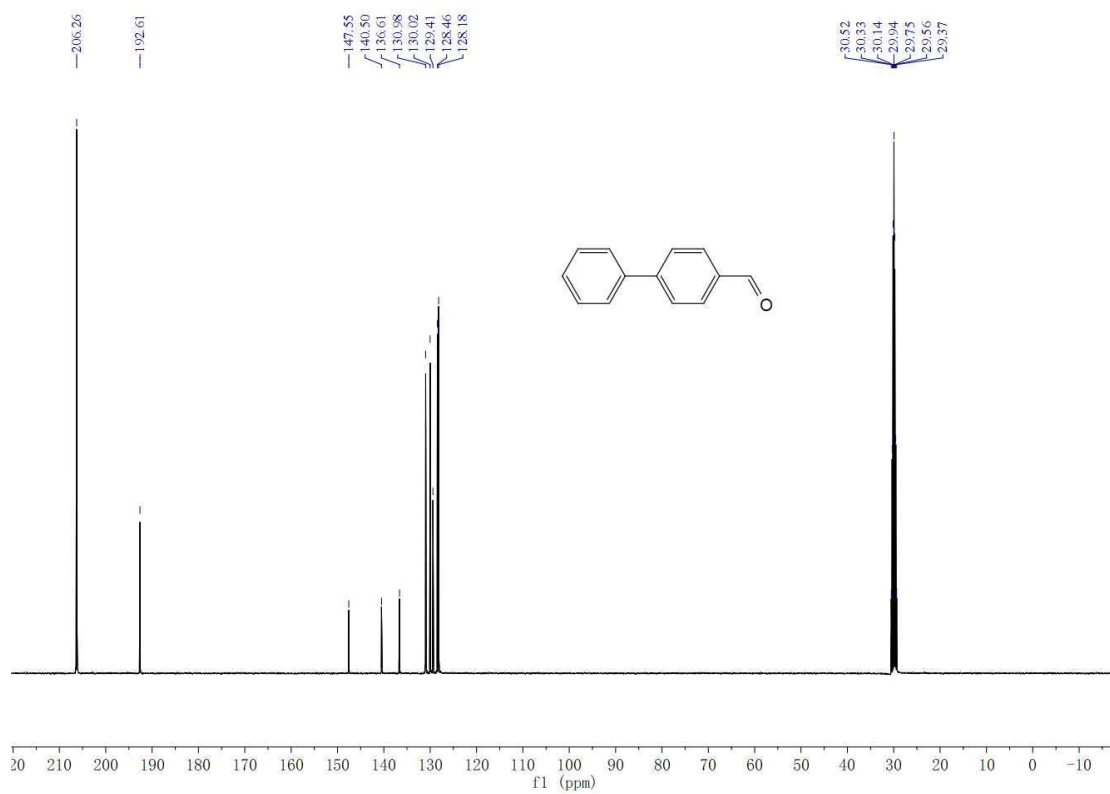

# 4-Fluorobiphenyl 3fa

## <sup>1</sup>H NMR

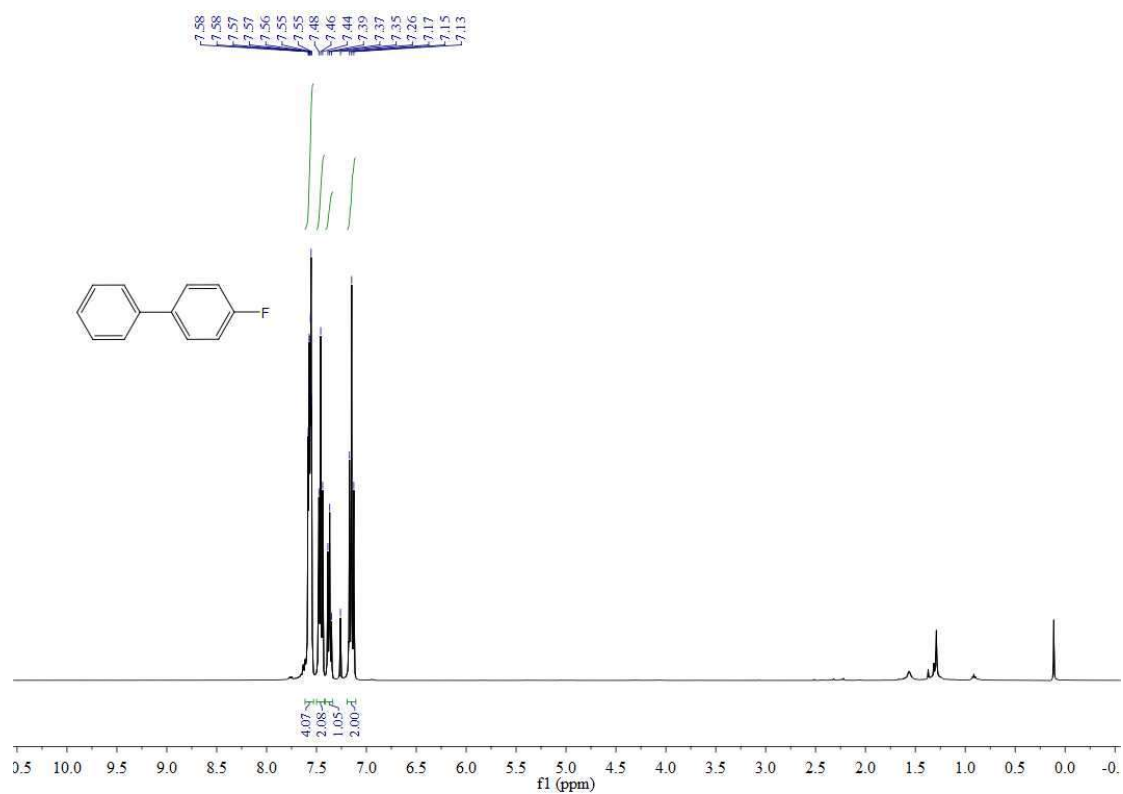

## <sup>13</sup>C NMR

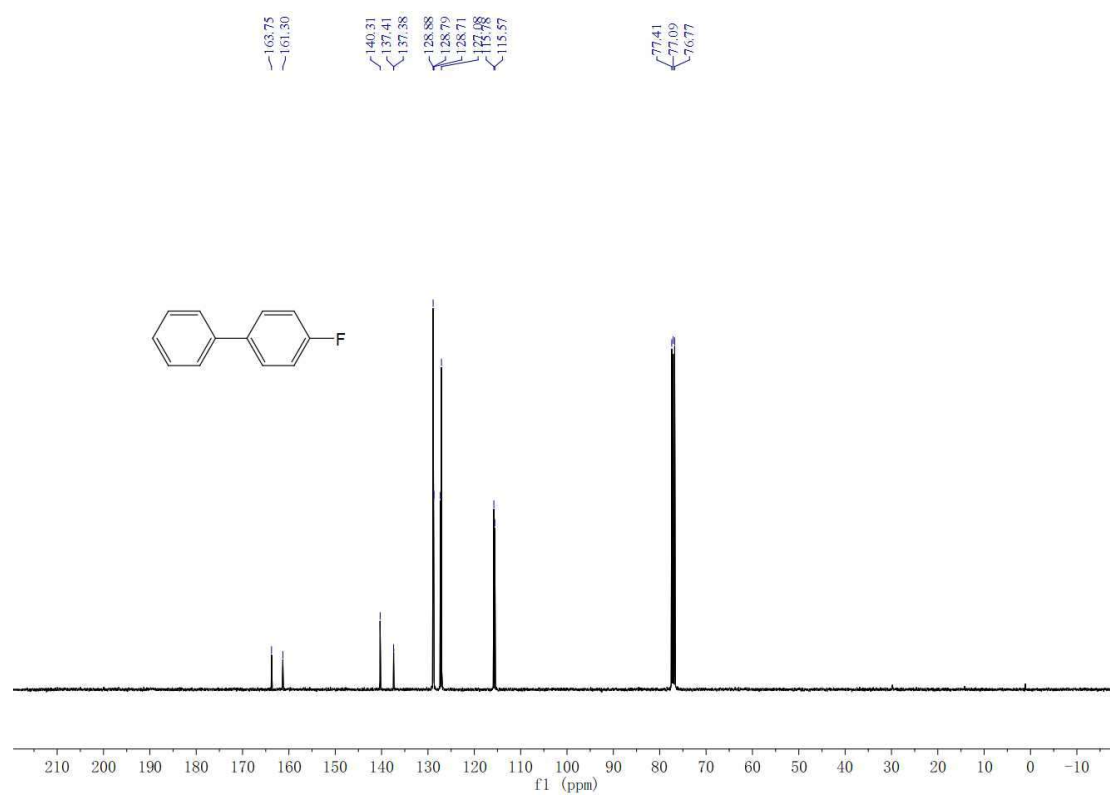

# 4-Chlorobiphenyl 3ga

## <sup>1</sup>H NMR

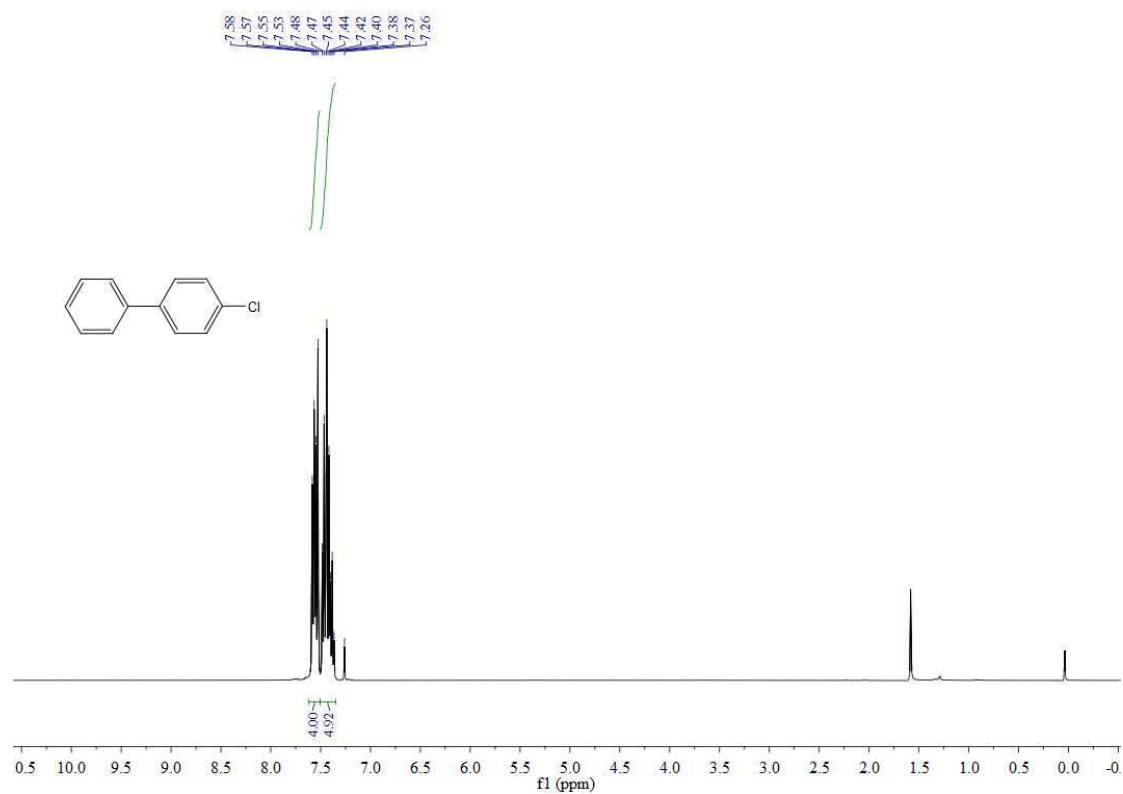

## <sup>13</sup>C NMR

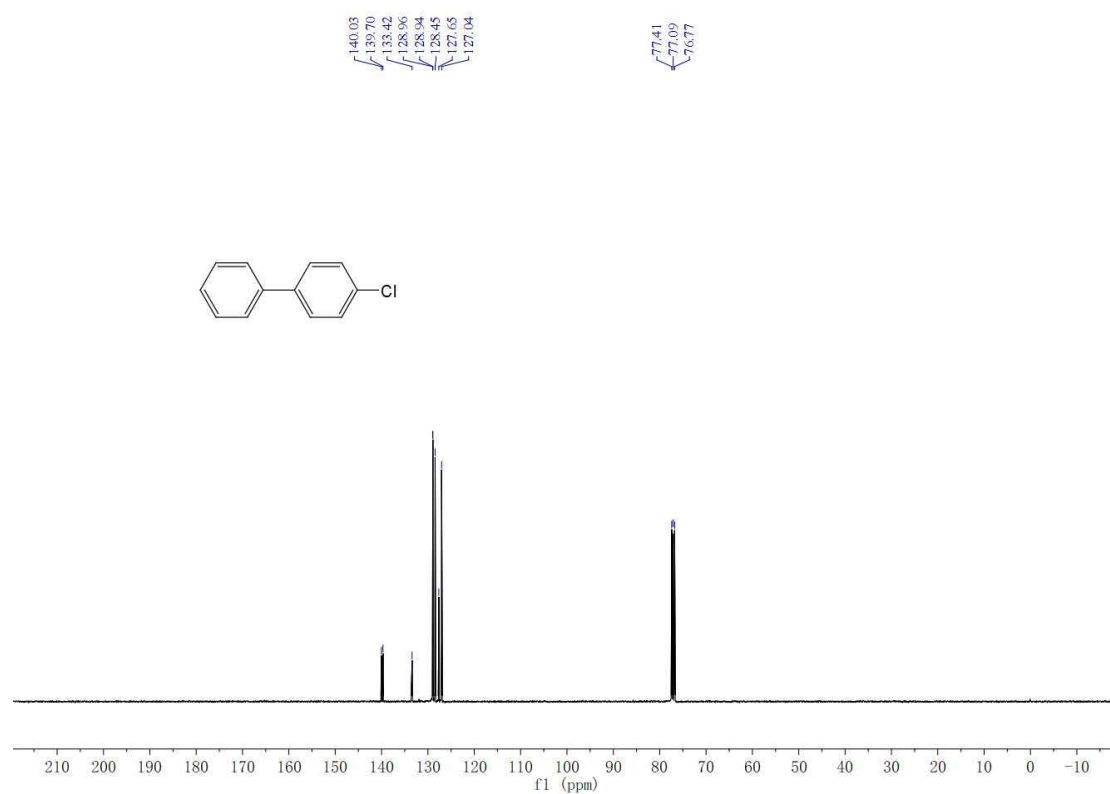

# 4-Isopropylbiphenyl 3ha

## <sup>1</sup>H NMR

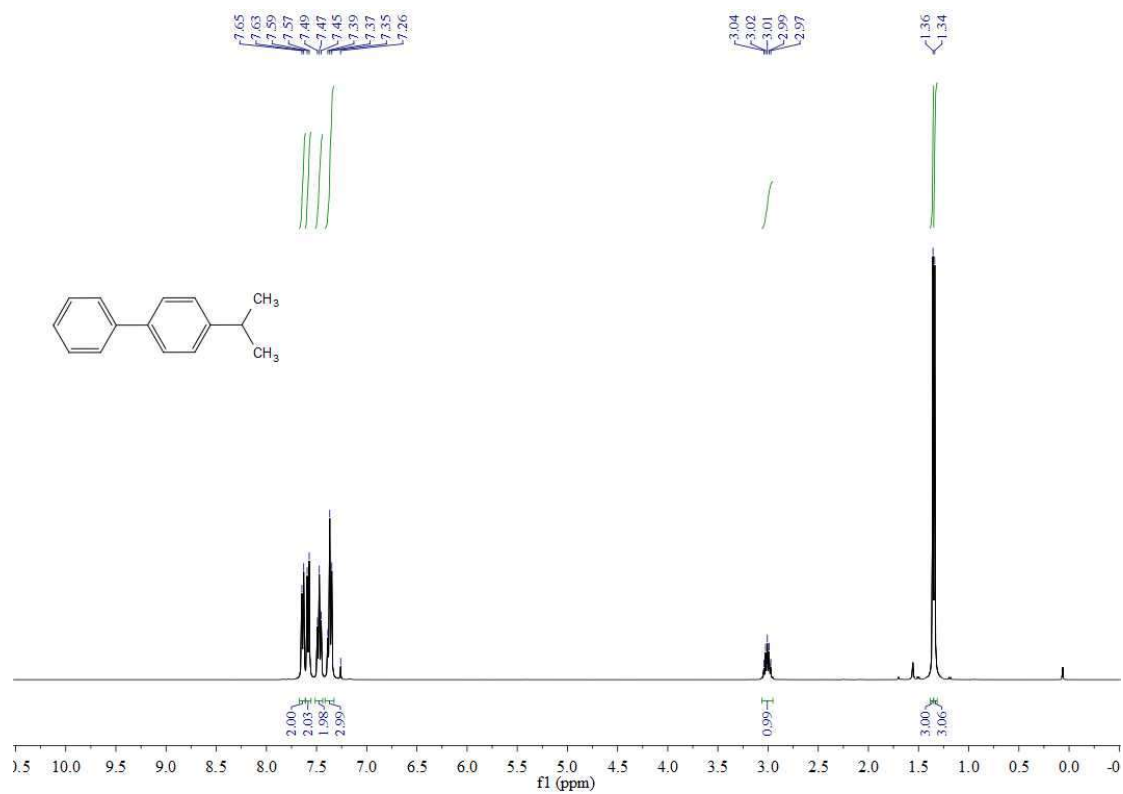

## <sup>13</sup>C NMR

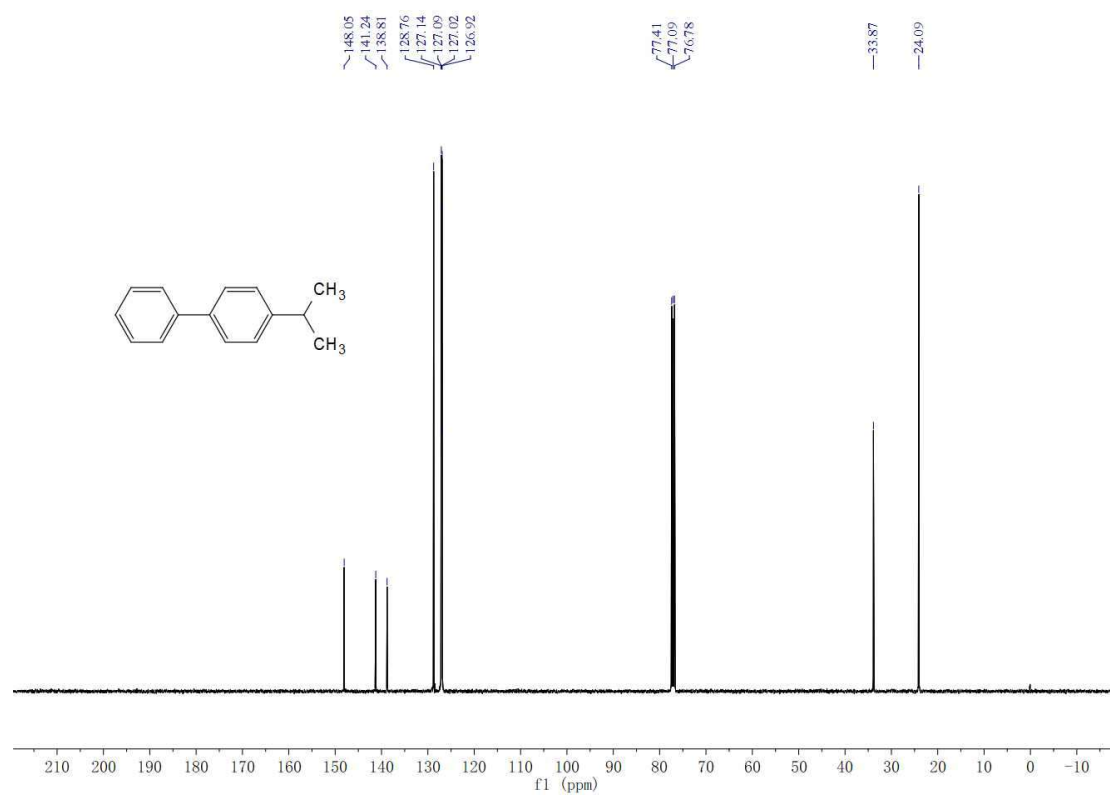

# 4-Methoxybiphenyl 3ia

## <sup>1</sup>H NMR

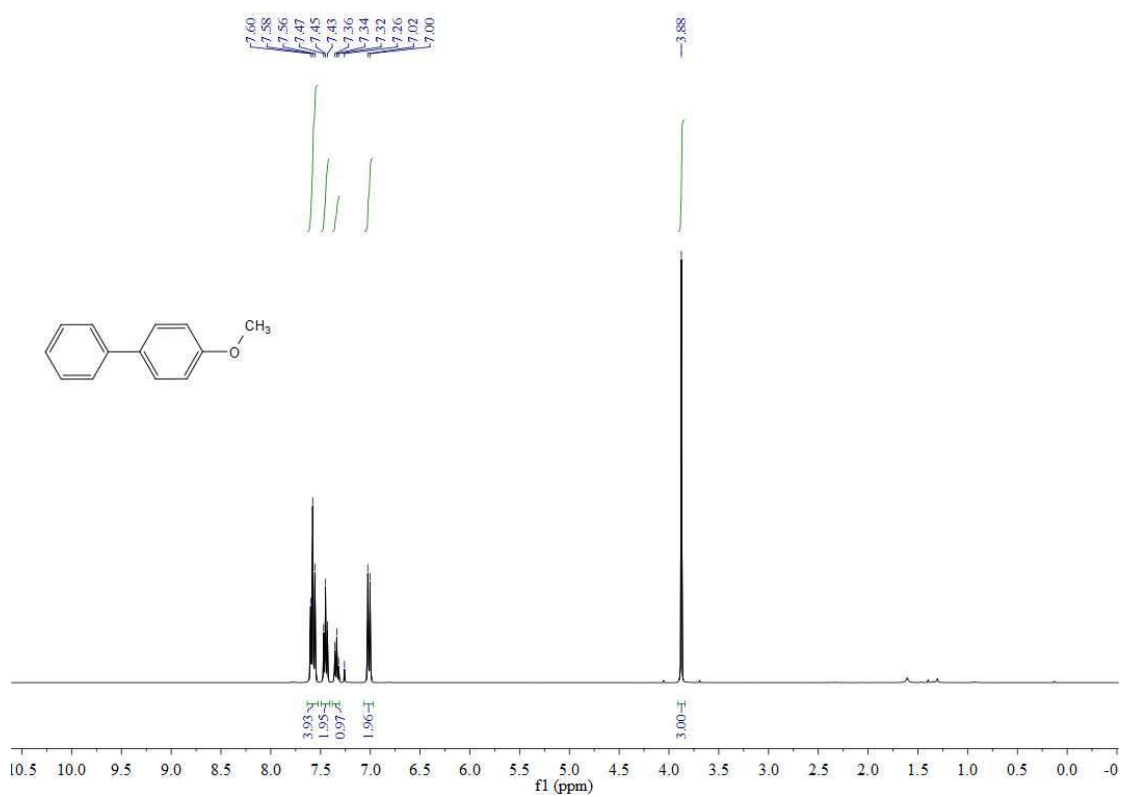

## <sup>13</sup>C NMR

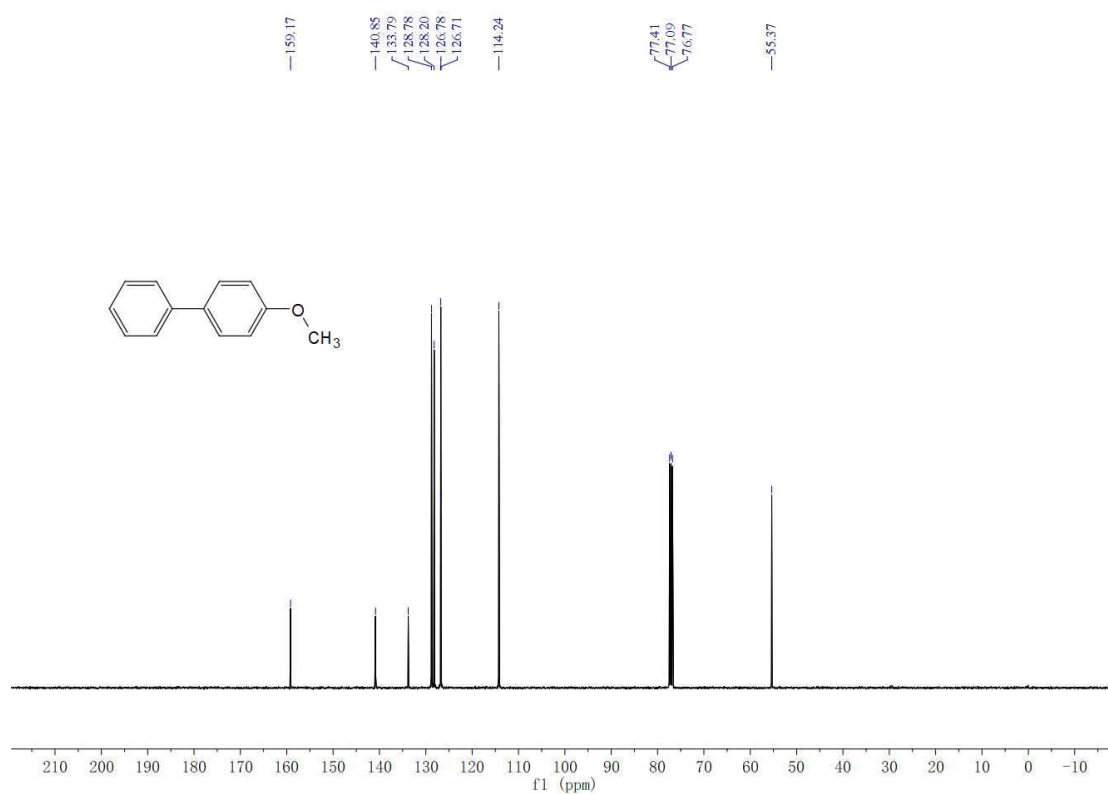

# 4-Phenylaniline 3ja

## <sup>1</sup>H NMR

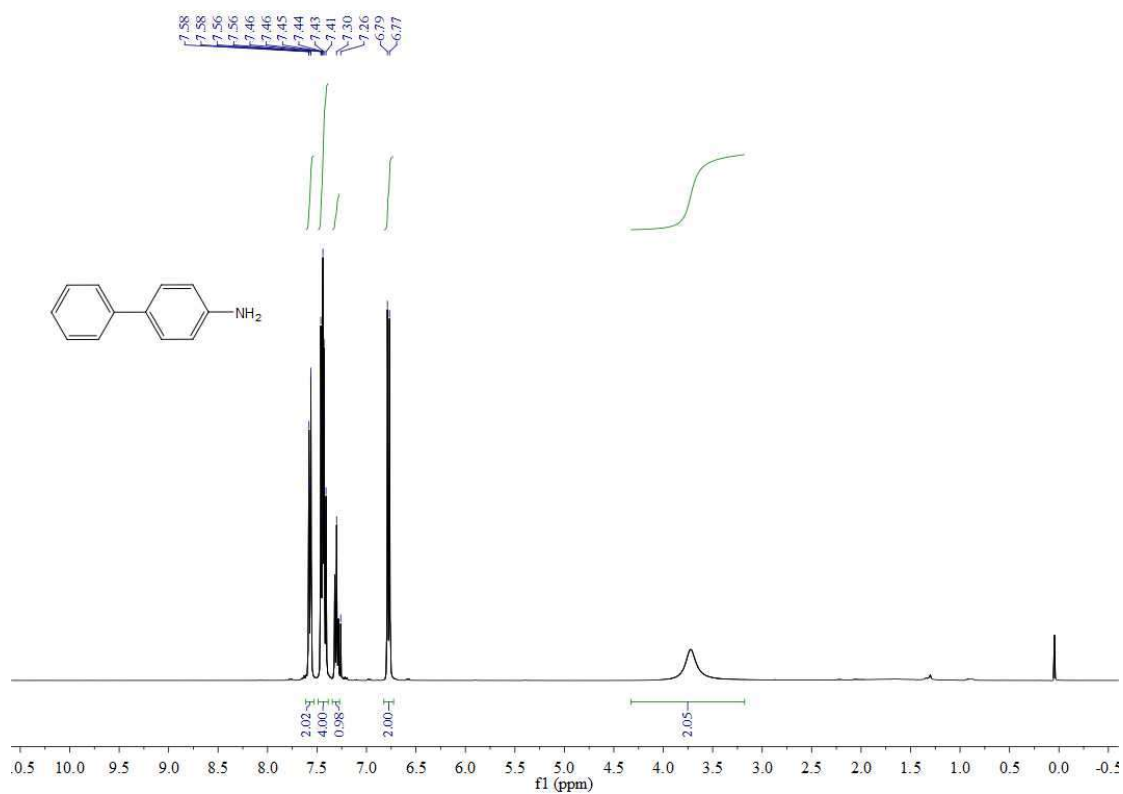

## <sup>13</sup>C NMR

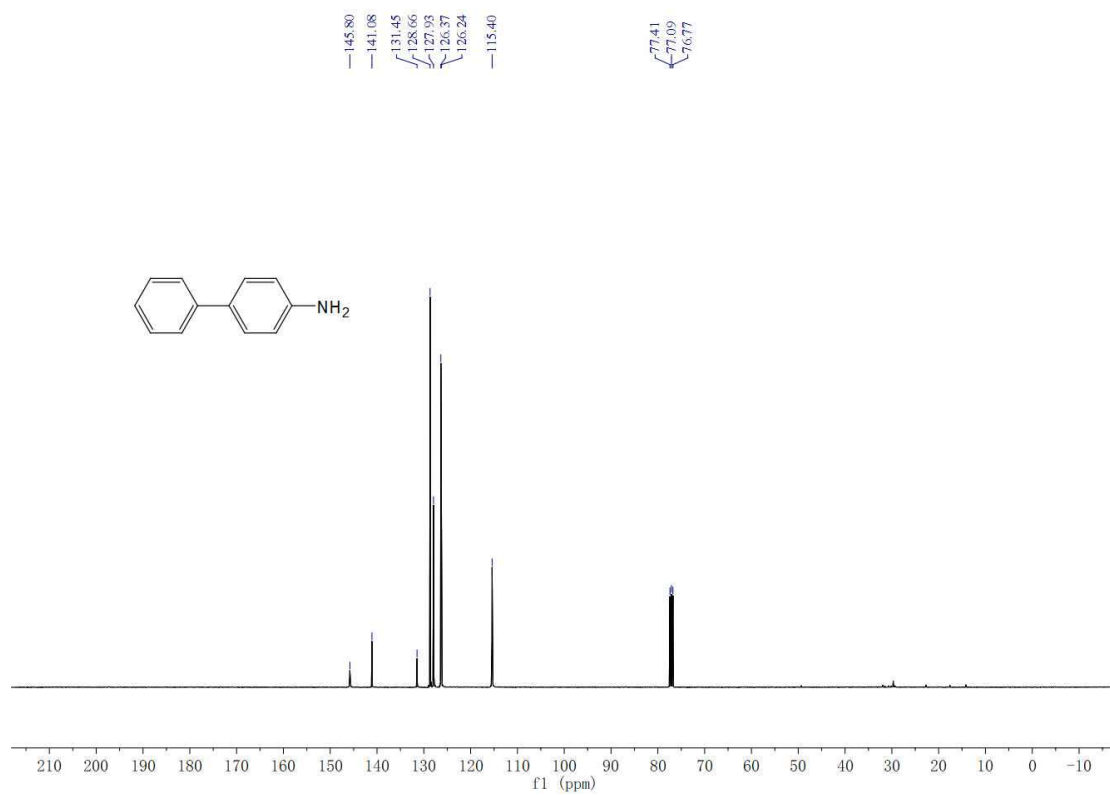

# 1-Phenylnaphthalene 3ka

## <sup>1</sup>H NMR

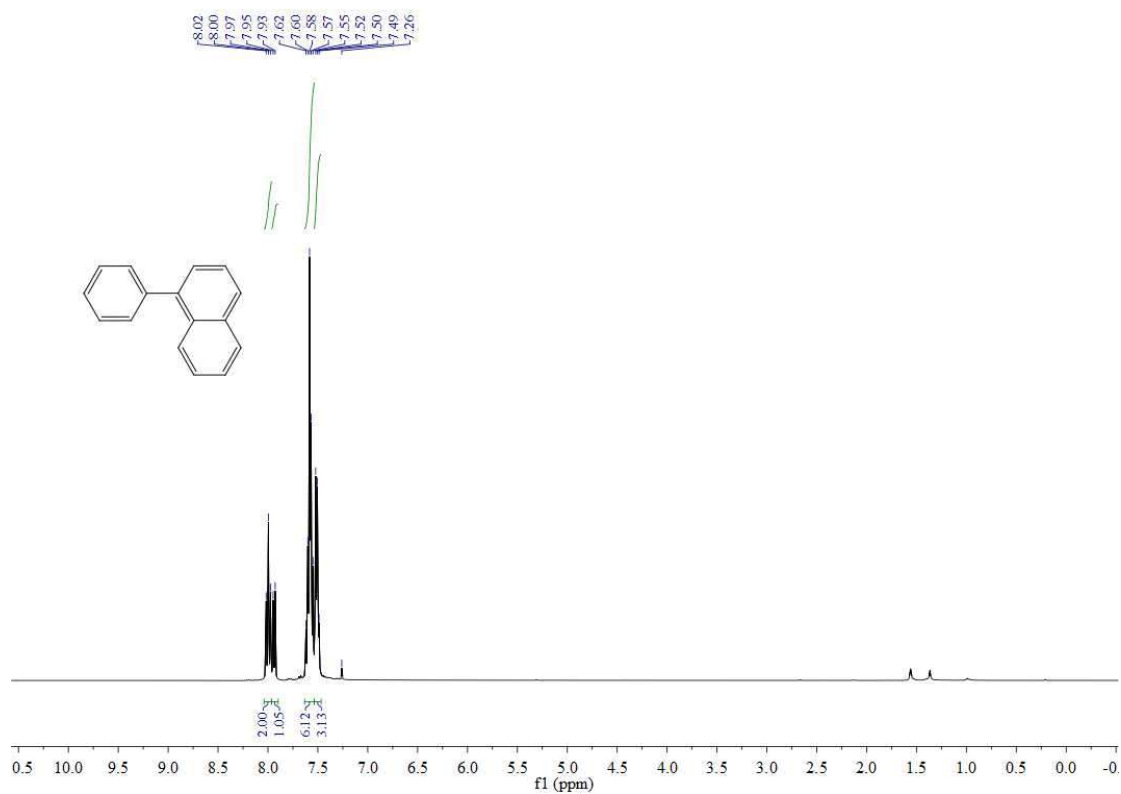

## <sup>13</sup>C NMR

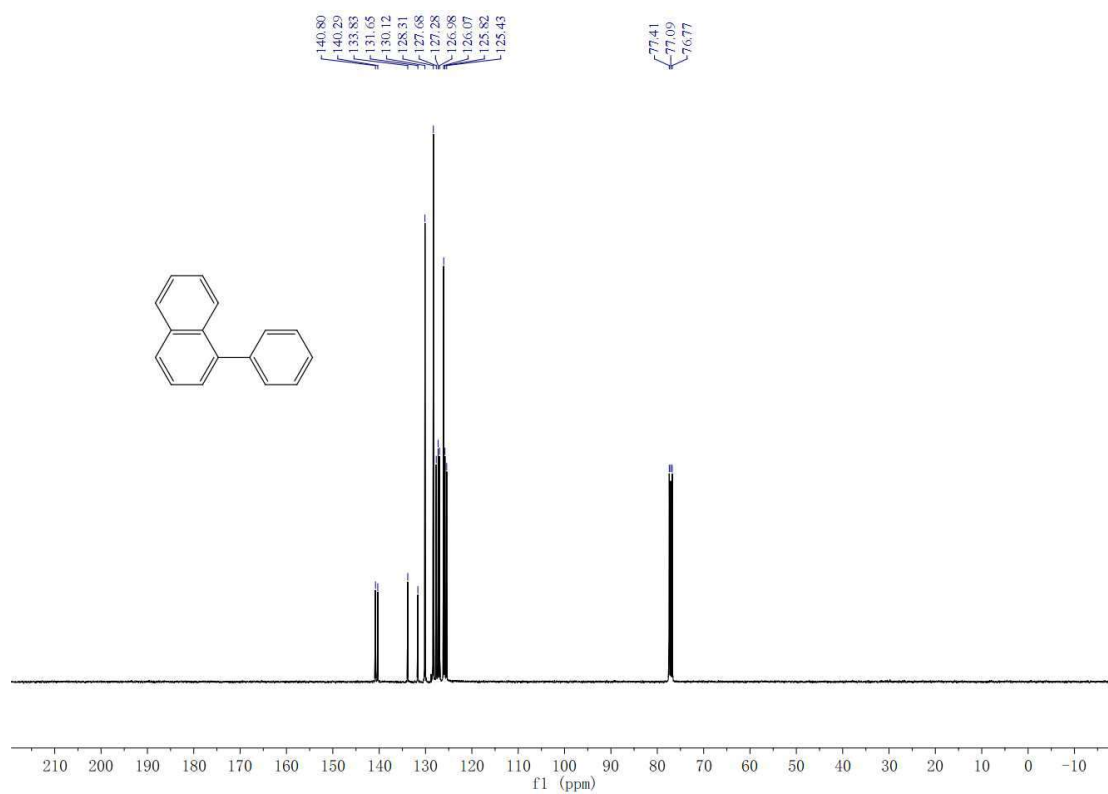

# 1-Biphenyl-4-ethanol 3la

## <sup>1</sup>H NMR

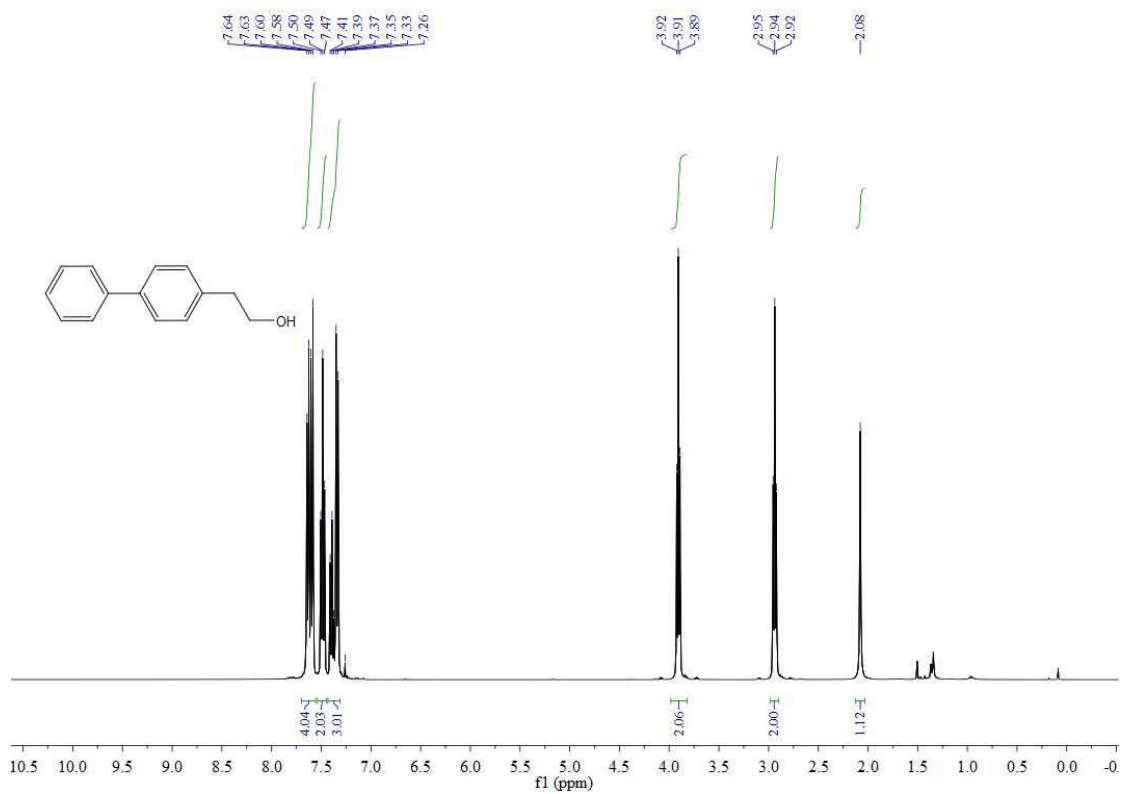

## <sup>13</sup>C NMR

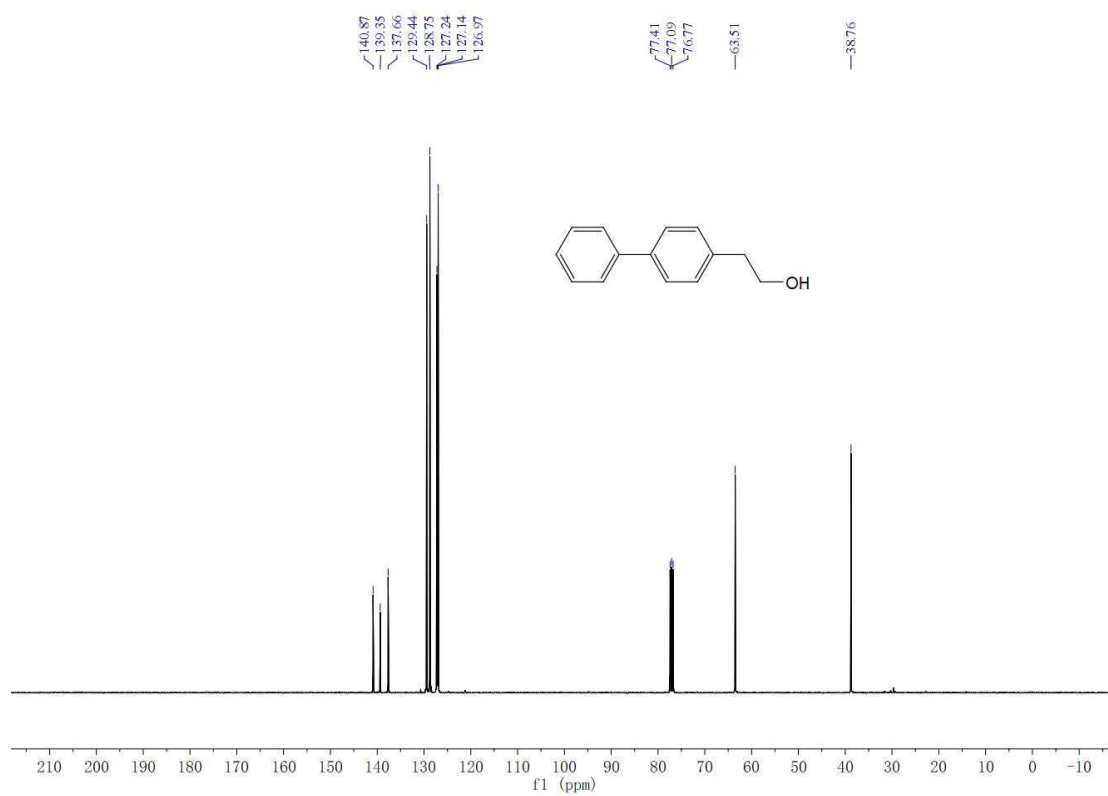



## 2-Acetylbiphenyl 3ma

### $^1\text{H}$ NMR

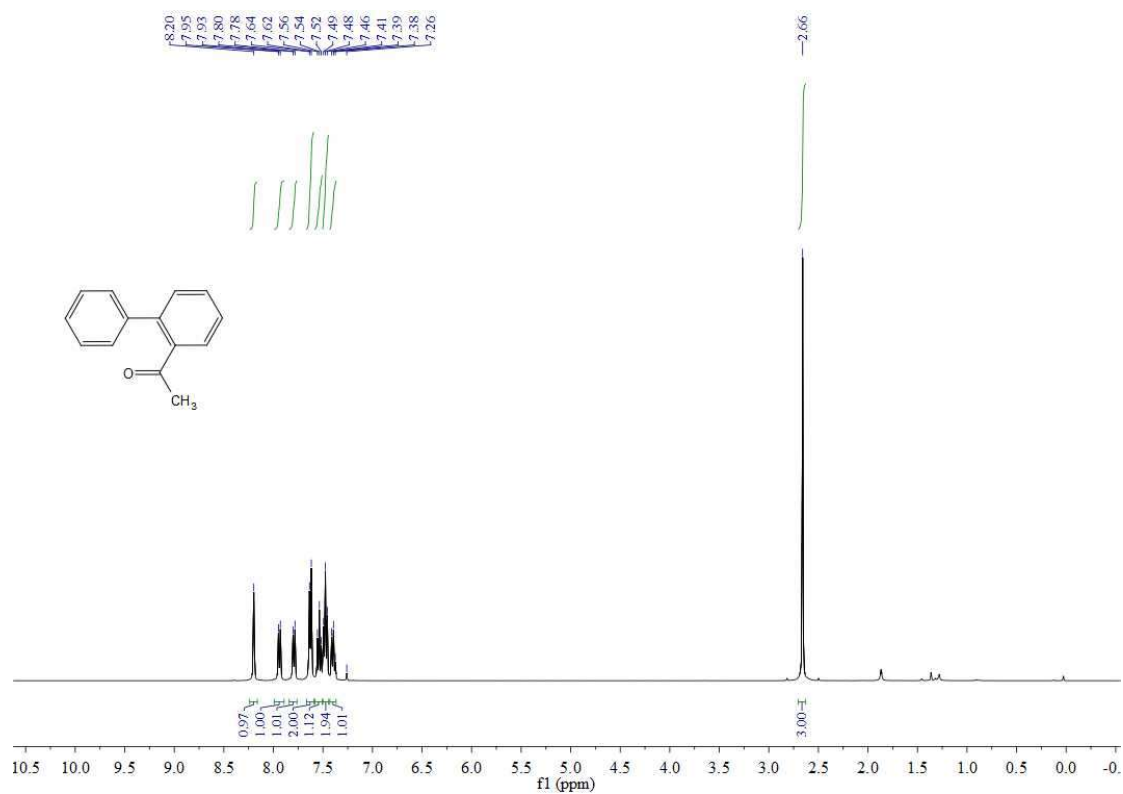

### $^{13}\text{C}$ NMR

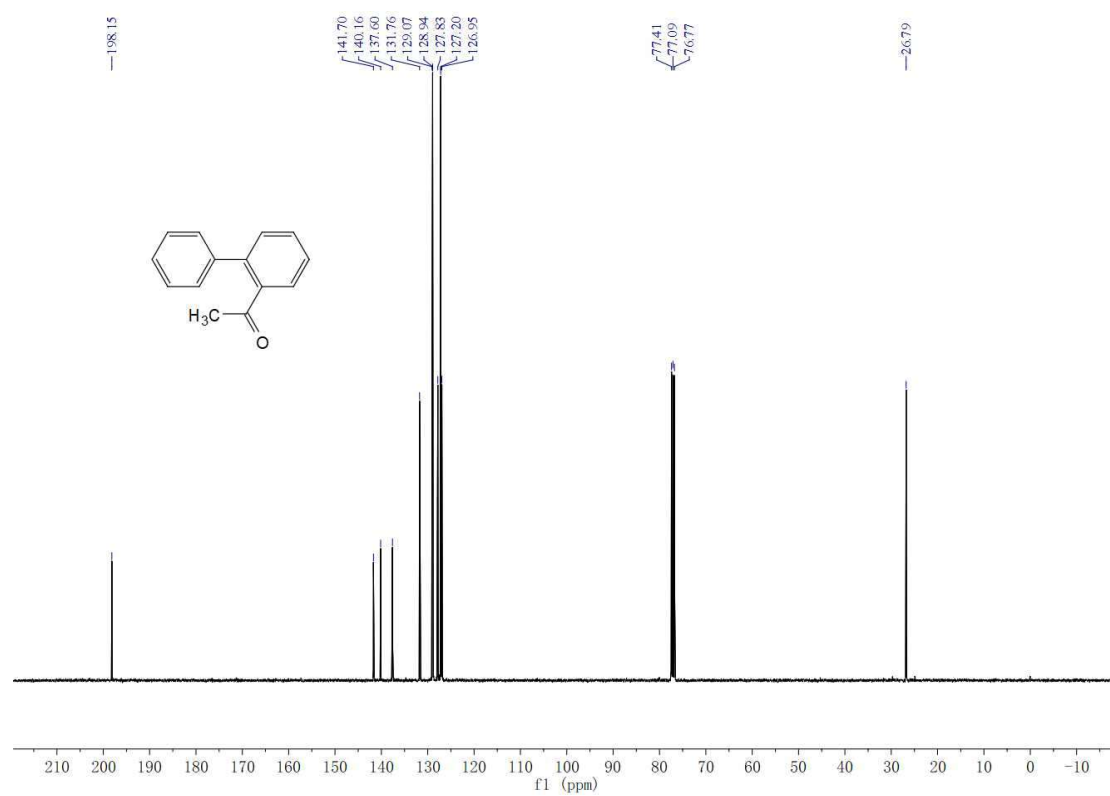

## 2-Aldehydebiphenyl 3na

### $^1\text{H}$ NMR

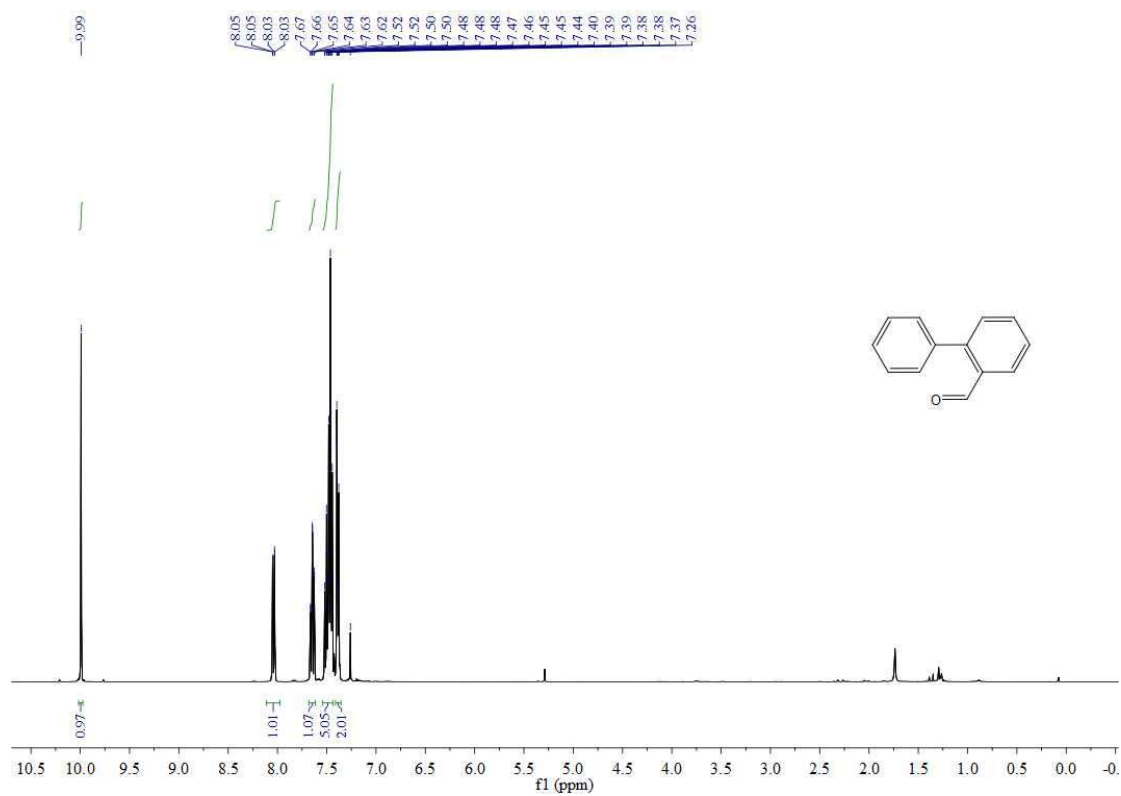

### $^{13}\text{C}$ NMR

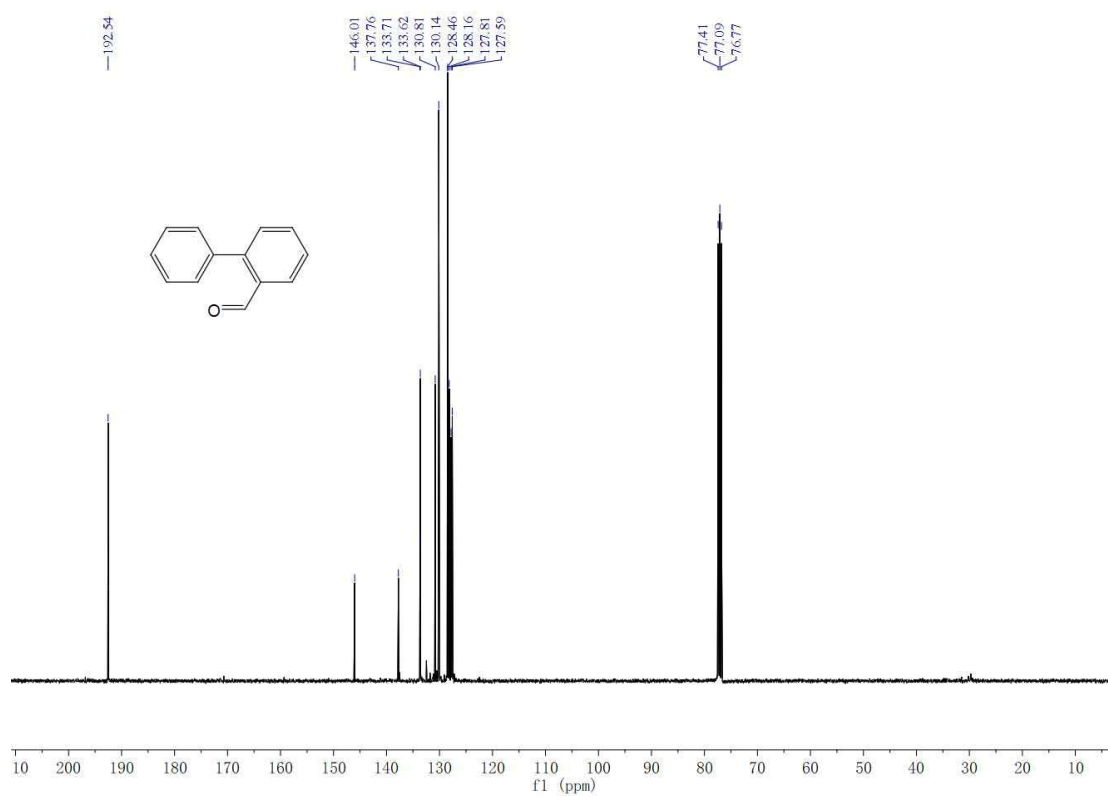

### 3-Acetylbiphenyl 30a

#### <sup>1</sup>H NMR

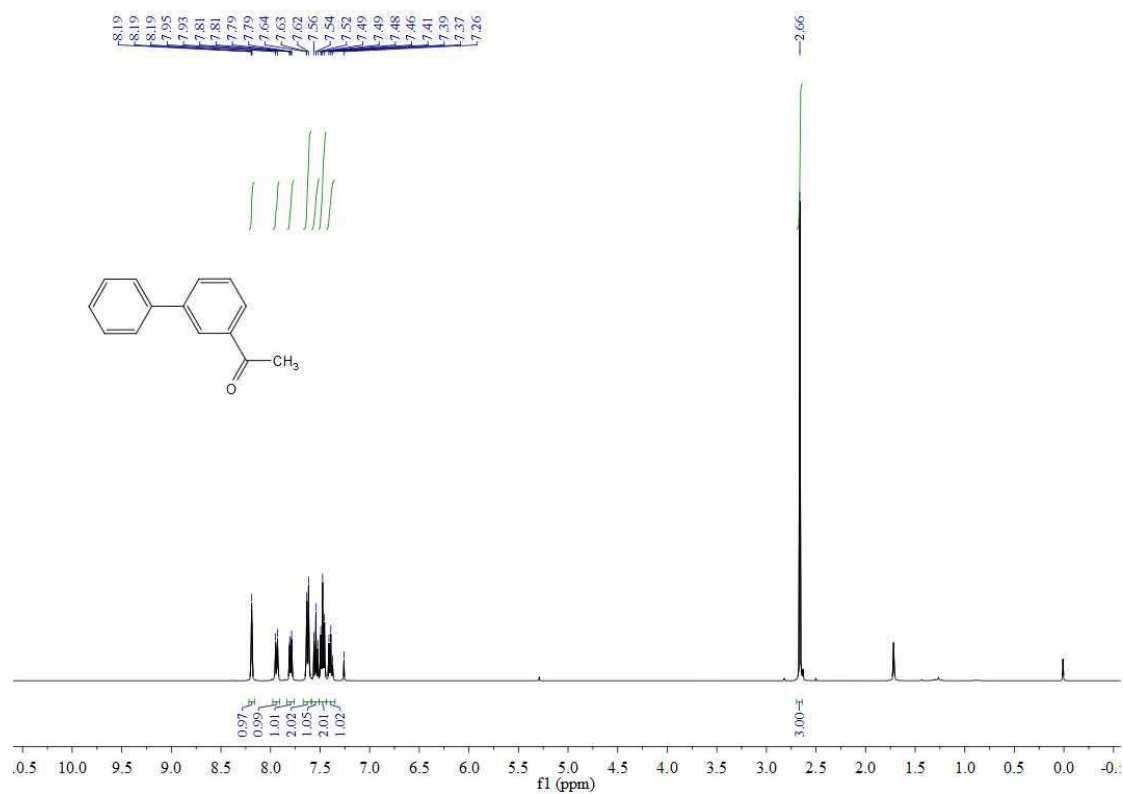

#### <sup>13</sup>C NMR

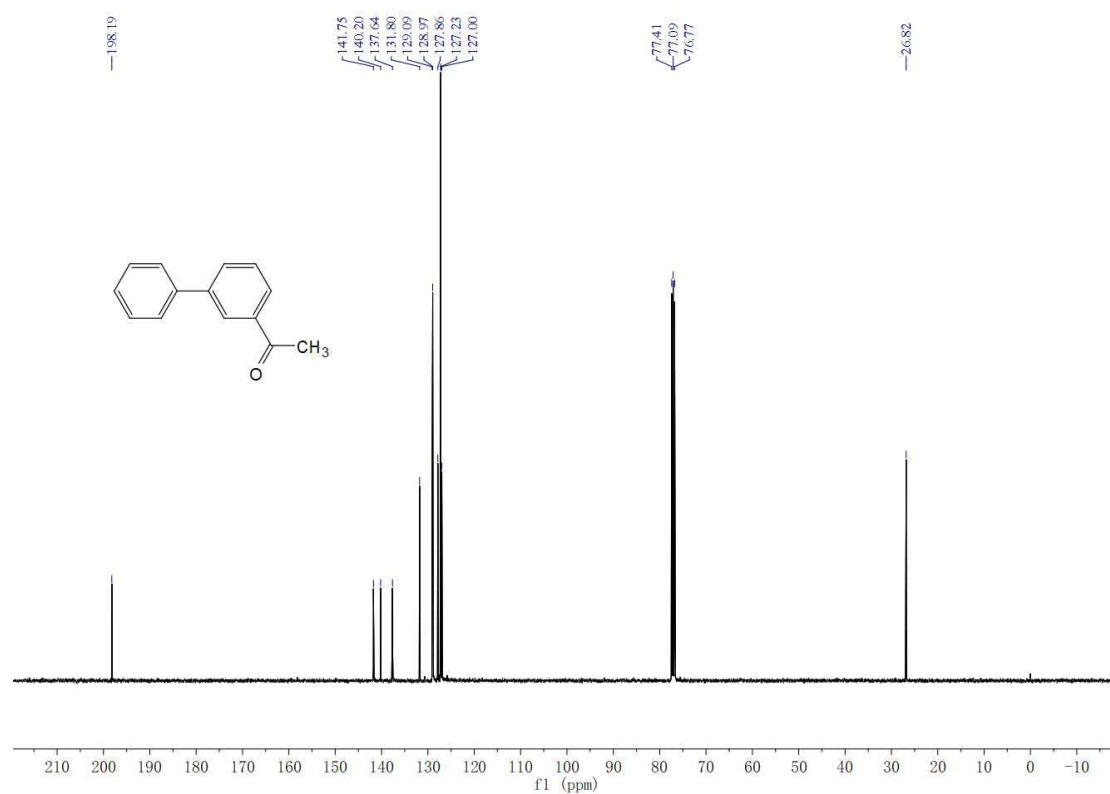

## 2-Tert-butylbiphenyl 3pa

### $^1\text{H}$ NMR

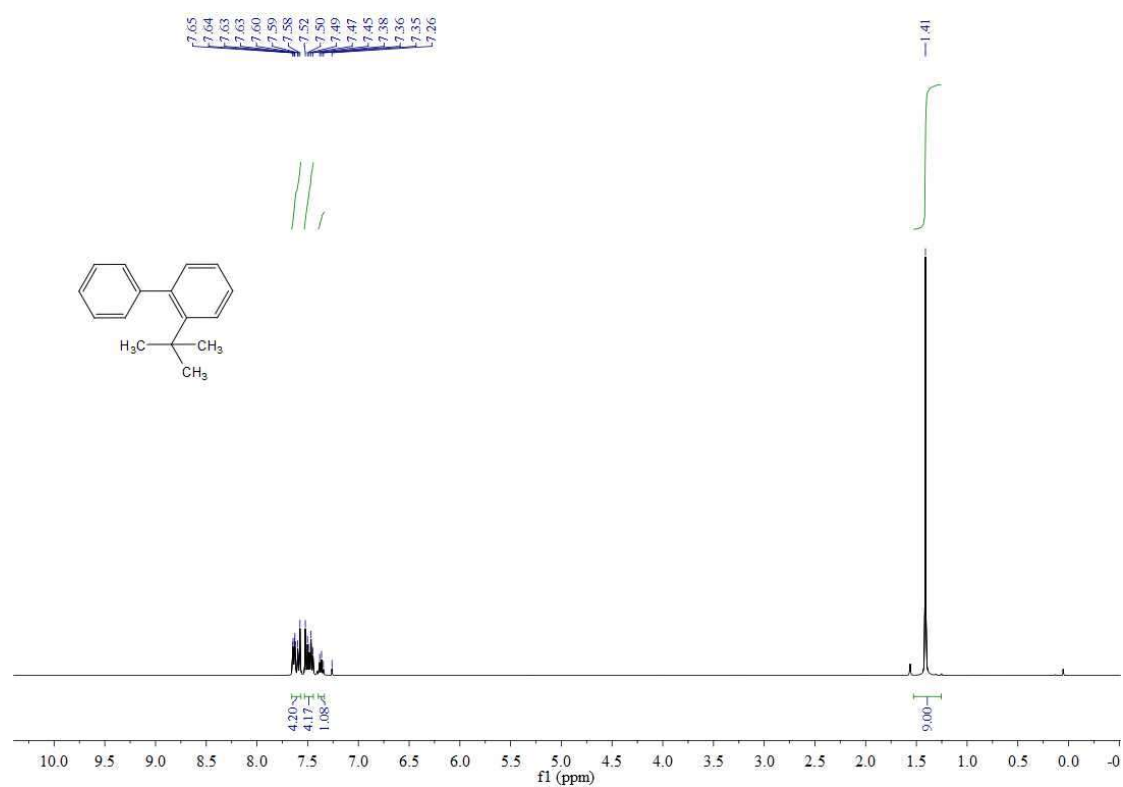

### $^{13}\text{C}$ NMR

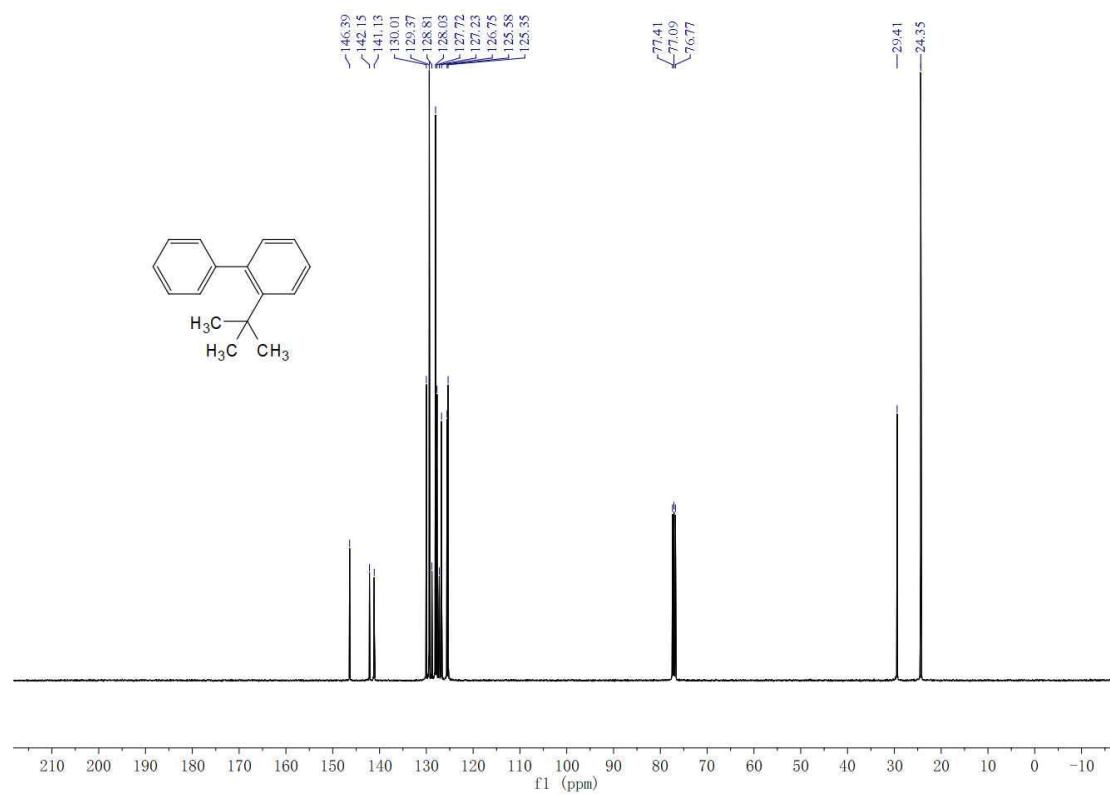

## 2-Methoxybiphenyl 3qa

### $^1\text{H}$ NMR

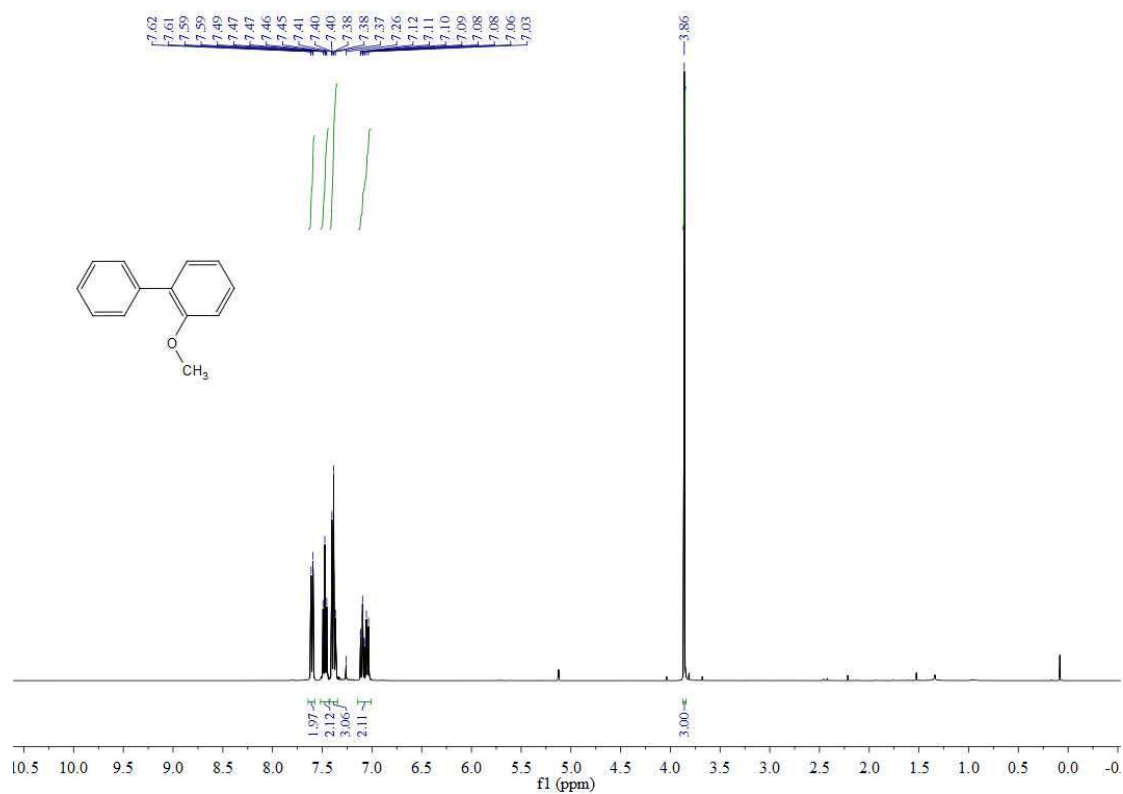

### $^{13}\text{C}$ NMR

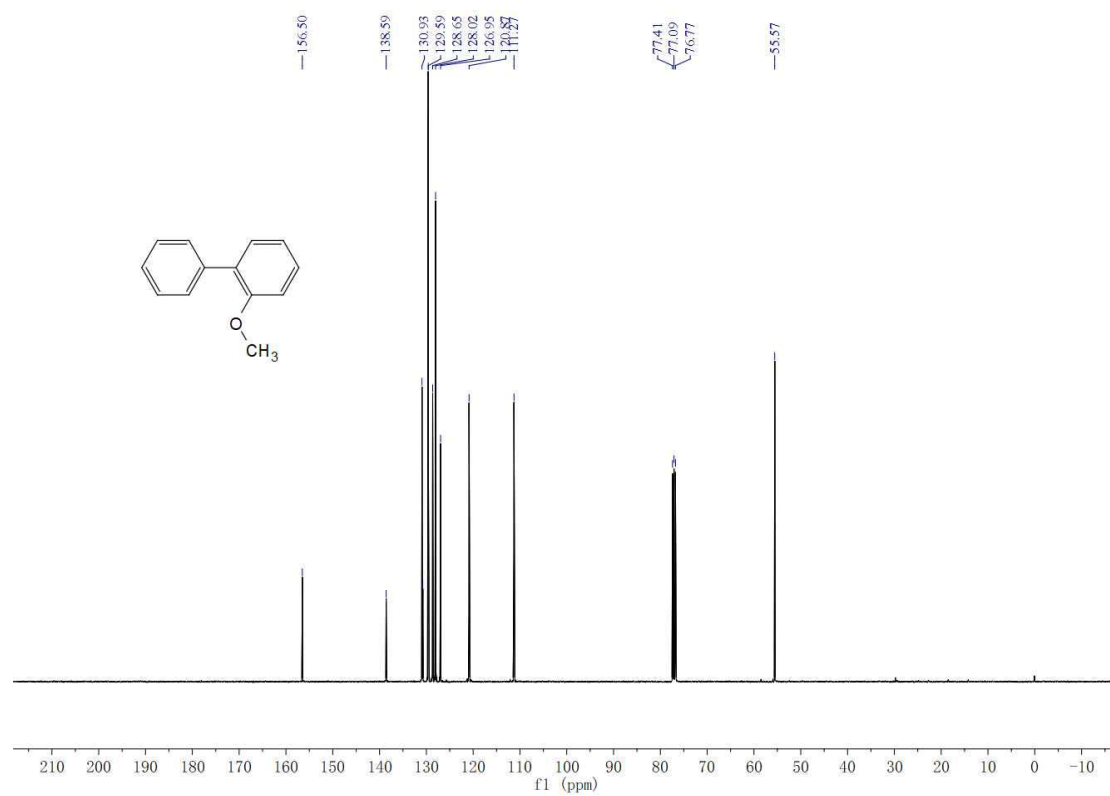

## 2-Methoxy-[1,1'-biphenyl]-4-carbaldehyde 3ra

### $^1\text{H}$ NMR

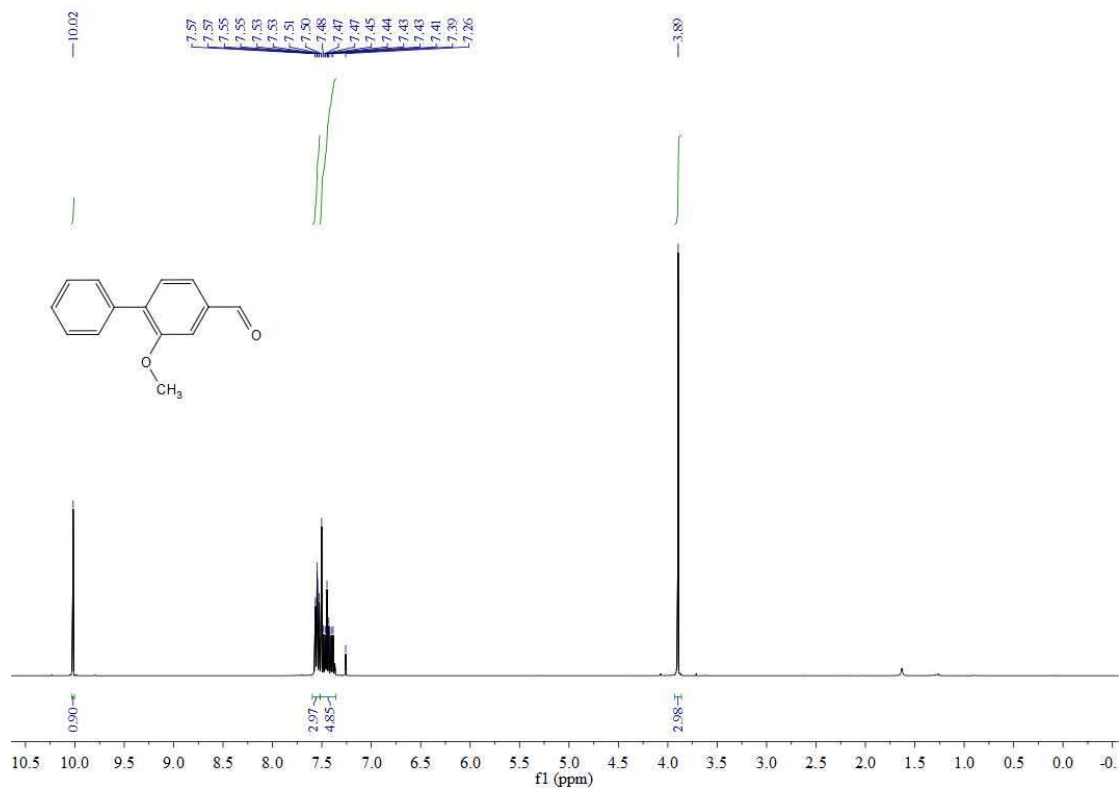

### $^{13}\text{C}$ NMR

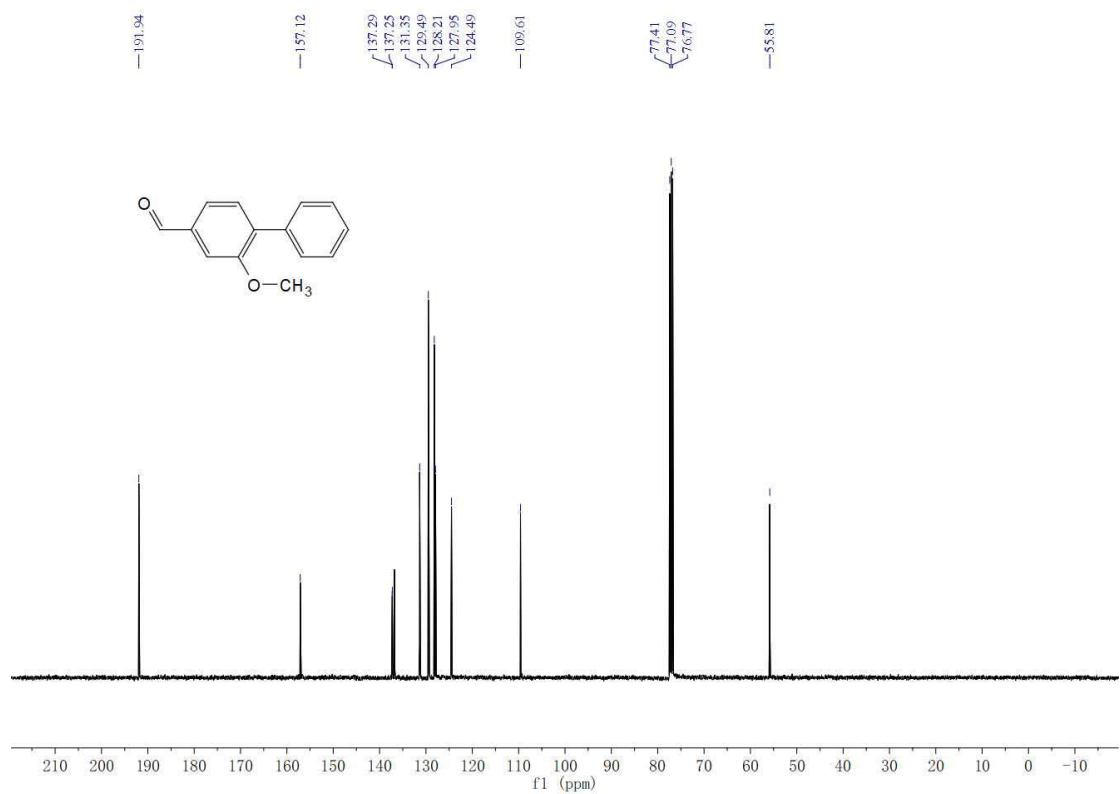

## 2-Tosyloxybiphenyl 3sa

### <sup>1</sup>H NMR

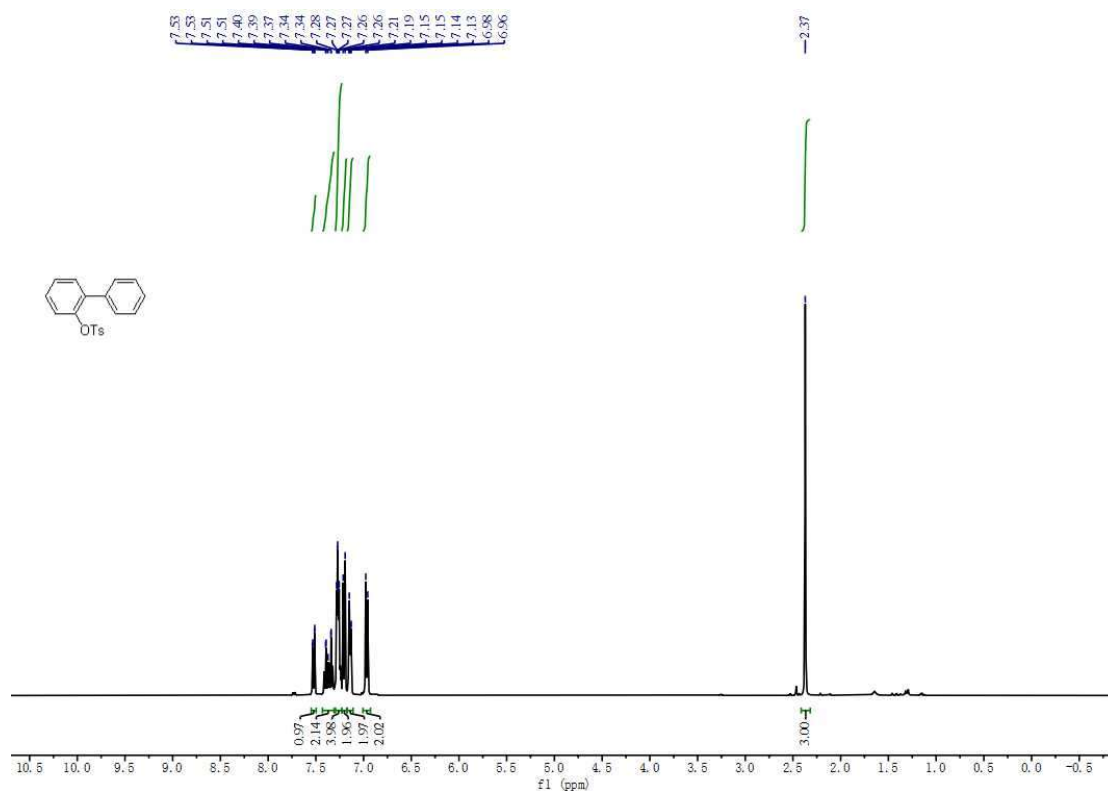

### <sup>13</sup>C NMR

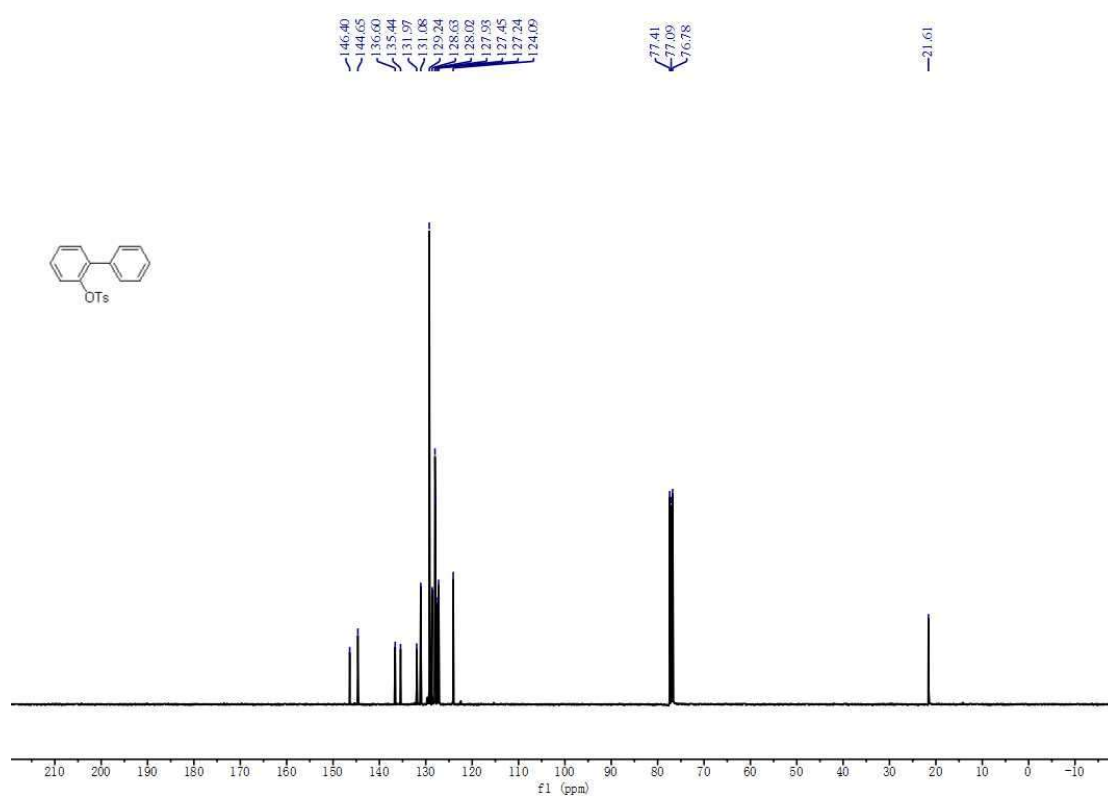

## 4-Phenylbiphenyl 3ta

### $^1\text{H}$ NMR

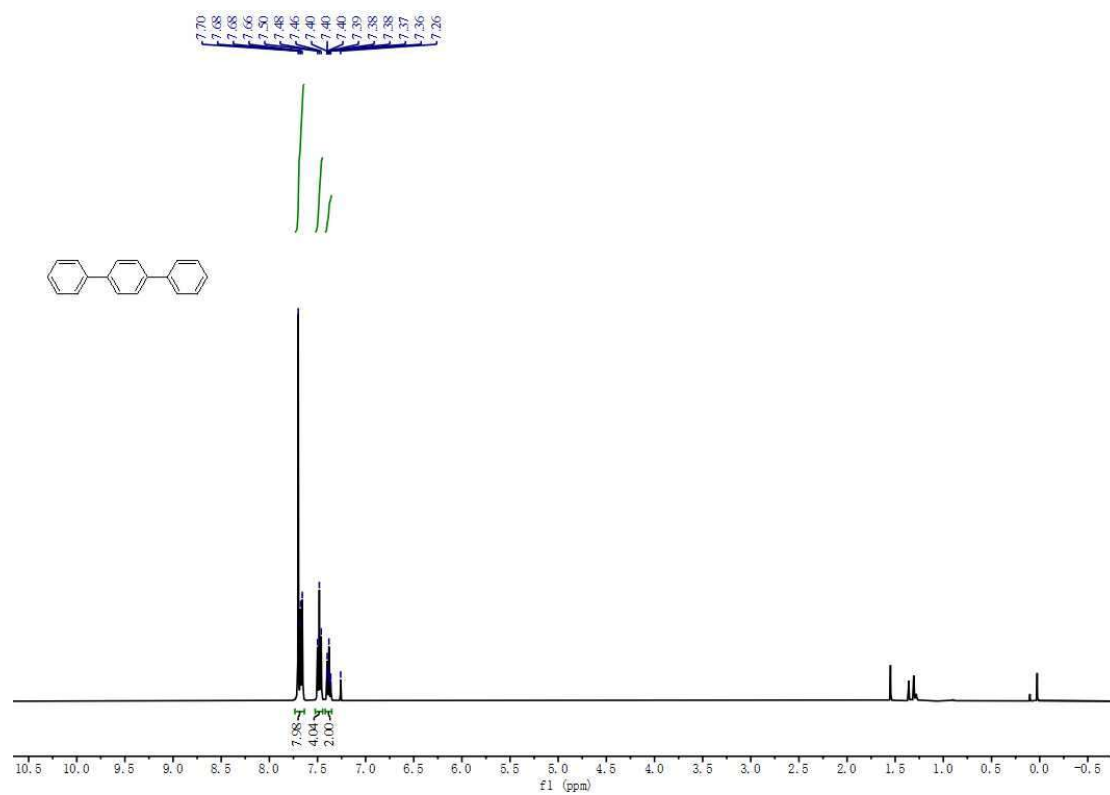

### $^{13}\text{C}$ NMR

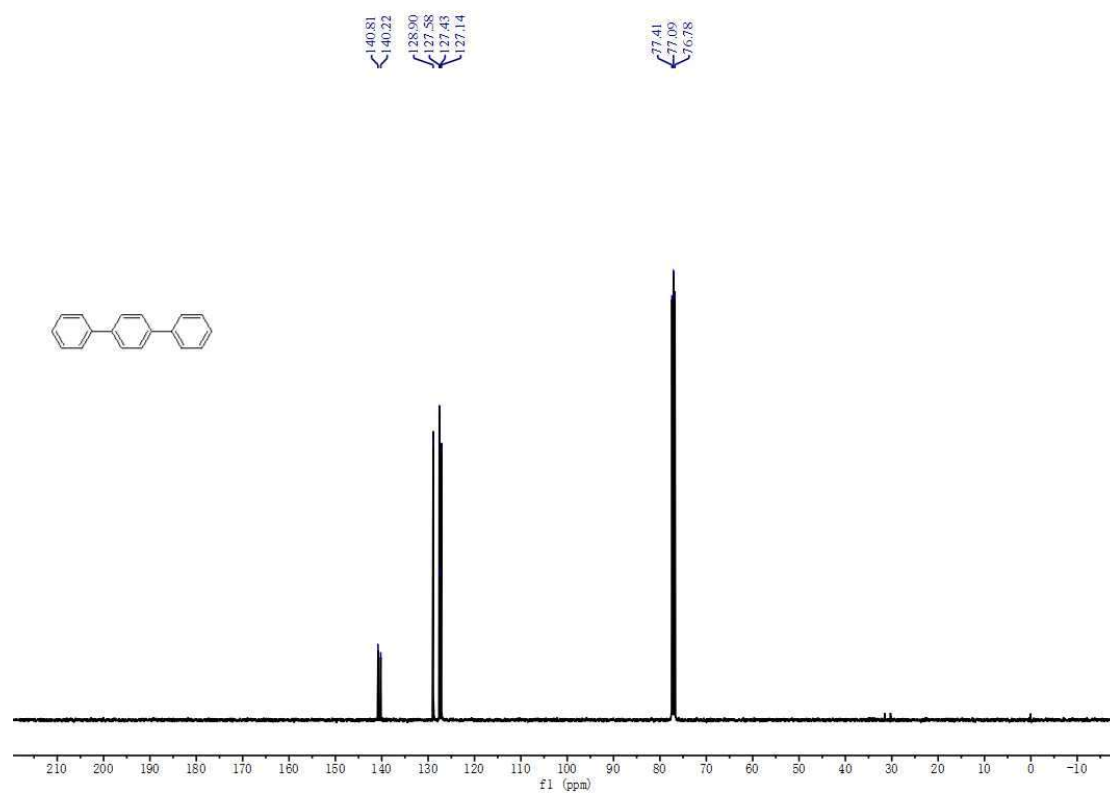



## <sup>1</sup>H NMR

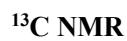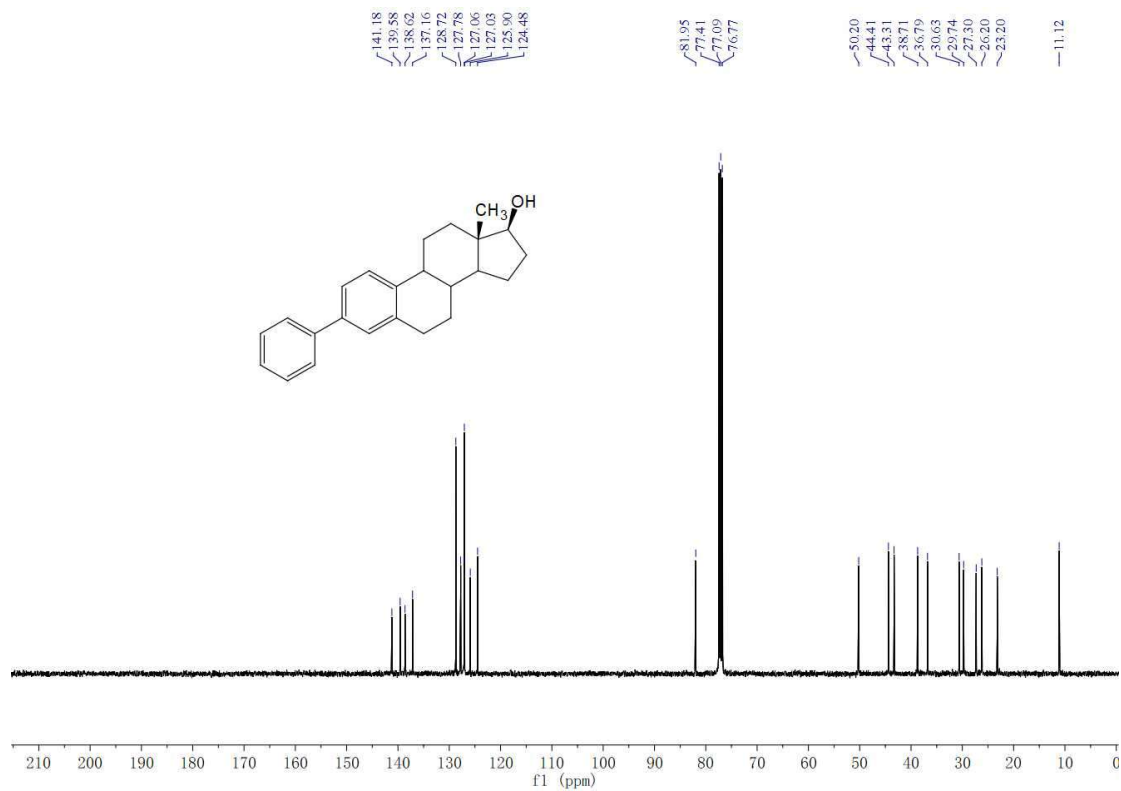

**13-Methyl-3-phenyl-6,7,8,9,11,12,13,14,15,16-decahydro-17H-cyclopenta[a]phenanthren-17-one 3va**

**<sup>1</sup>H NMR**

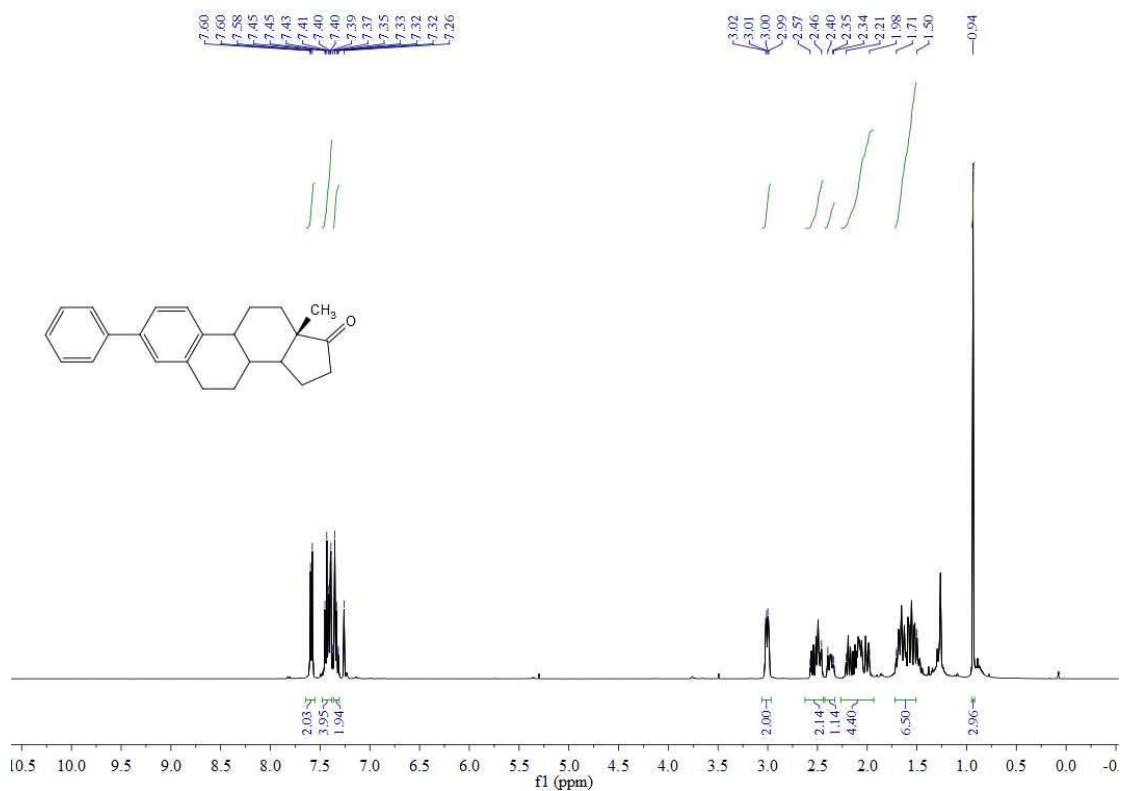

**<sup>13</sup>C NMR**

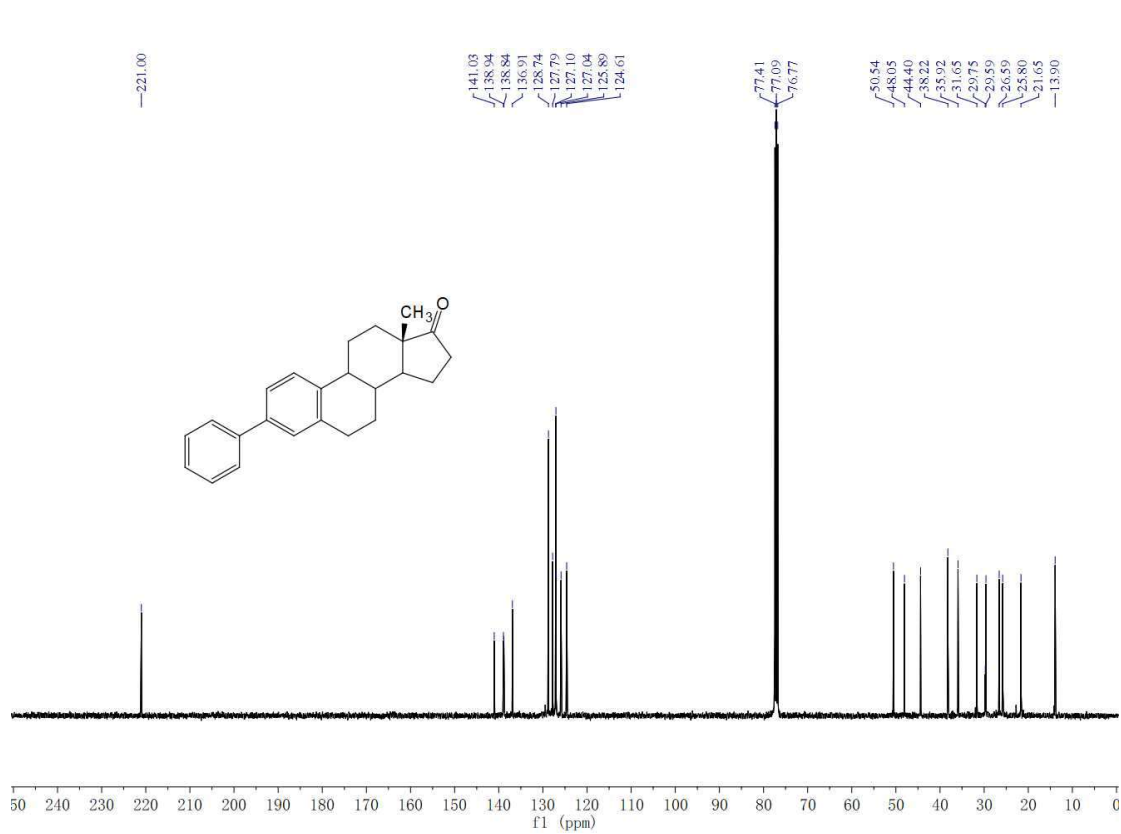

# 4-Acetyl-4'-methylbiphenyl 3ab

## <sup>1</sup>H NMR

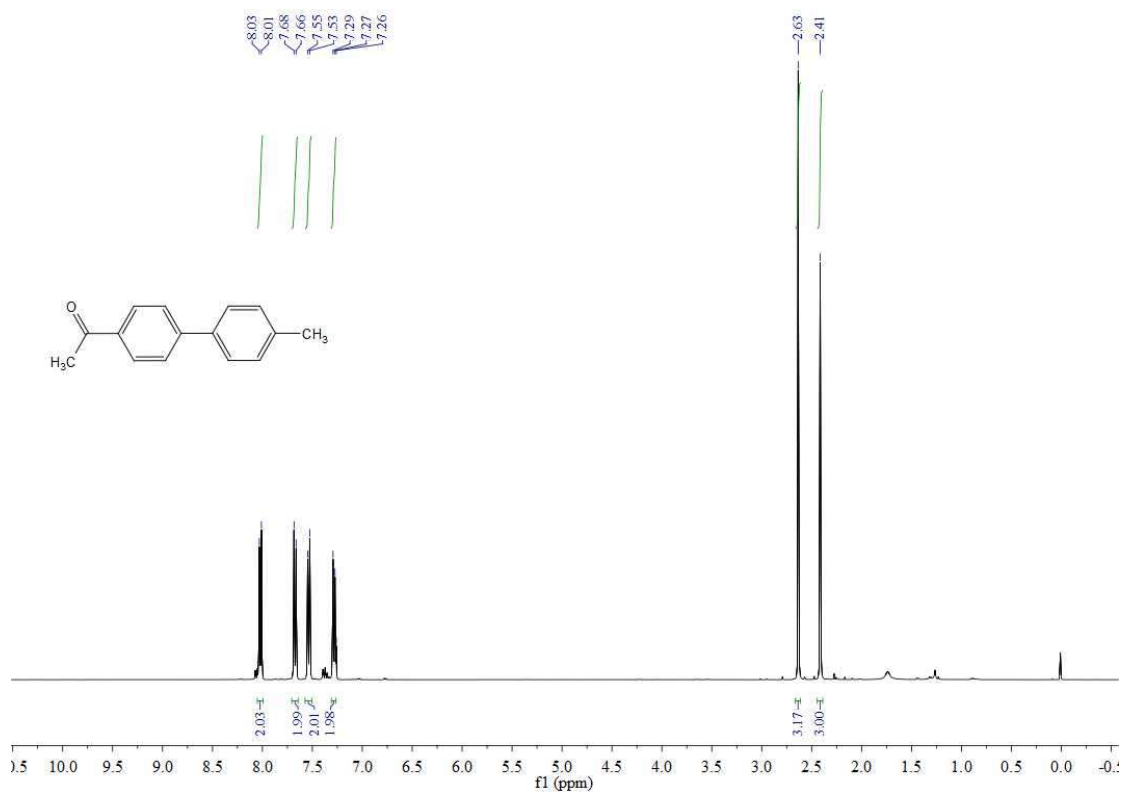

## <sup>13</sup>C NMR

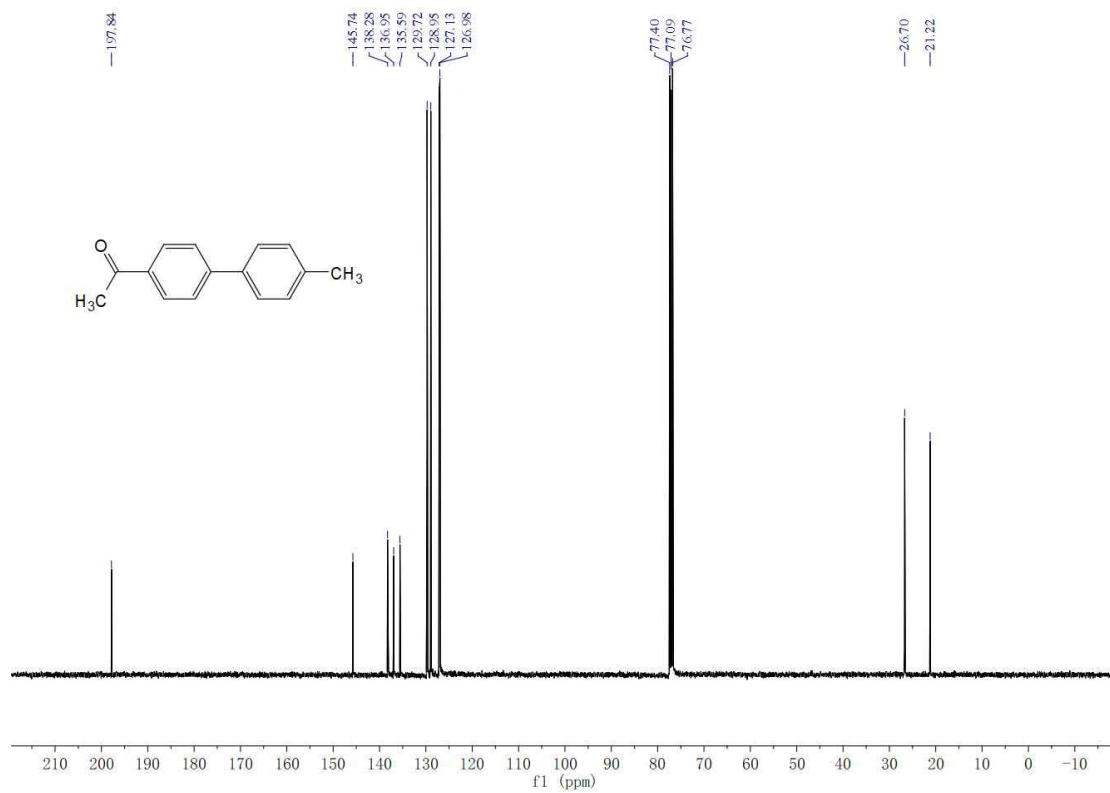

# 4-Acetyl-4'-tertiarybutylbiphenyl 3ac

## <sup>1</sup>H NMR

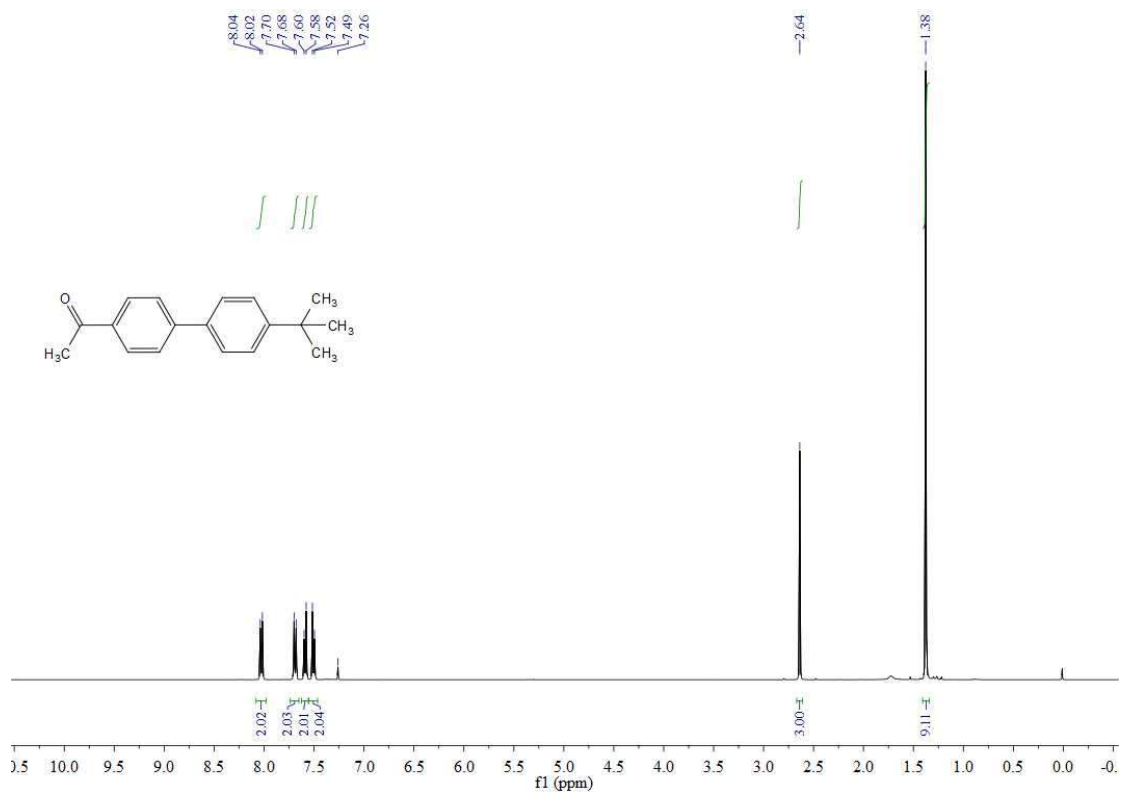

## <sup>13</sup>C NMR

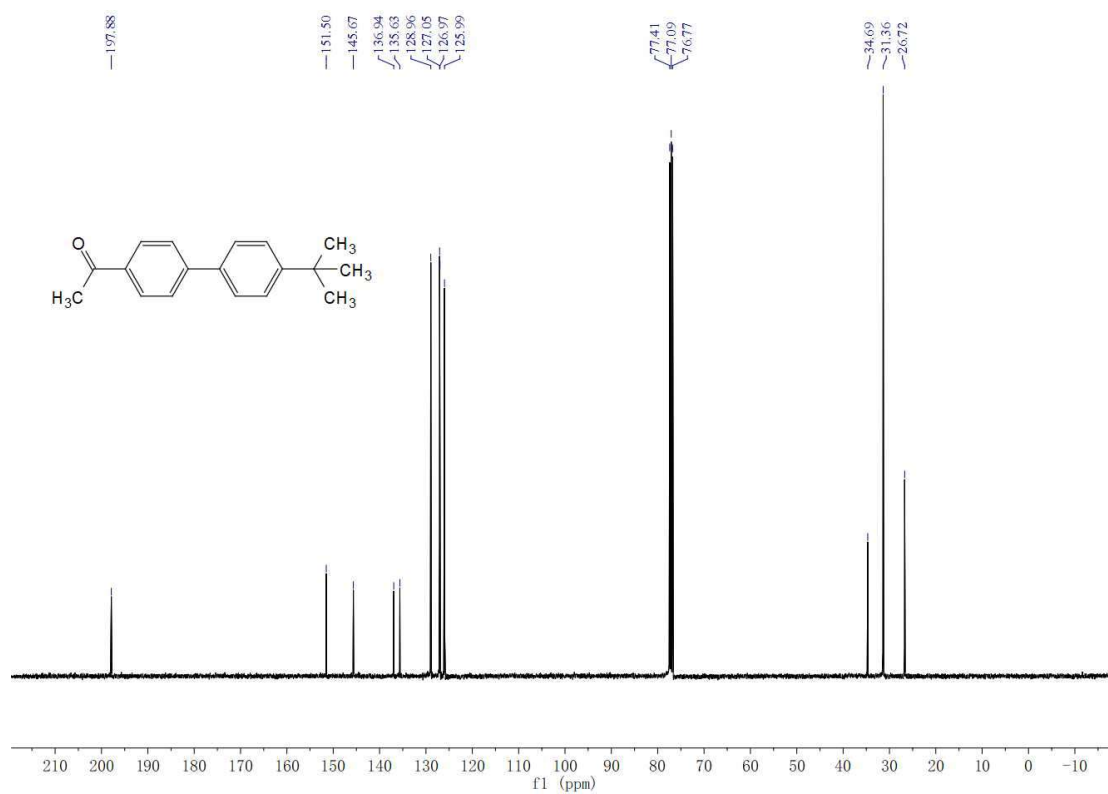

# 4-Acetyl-4'-methoxybiphenyl 3ad

## <sup>1</sup>H NMR

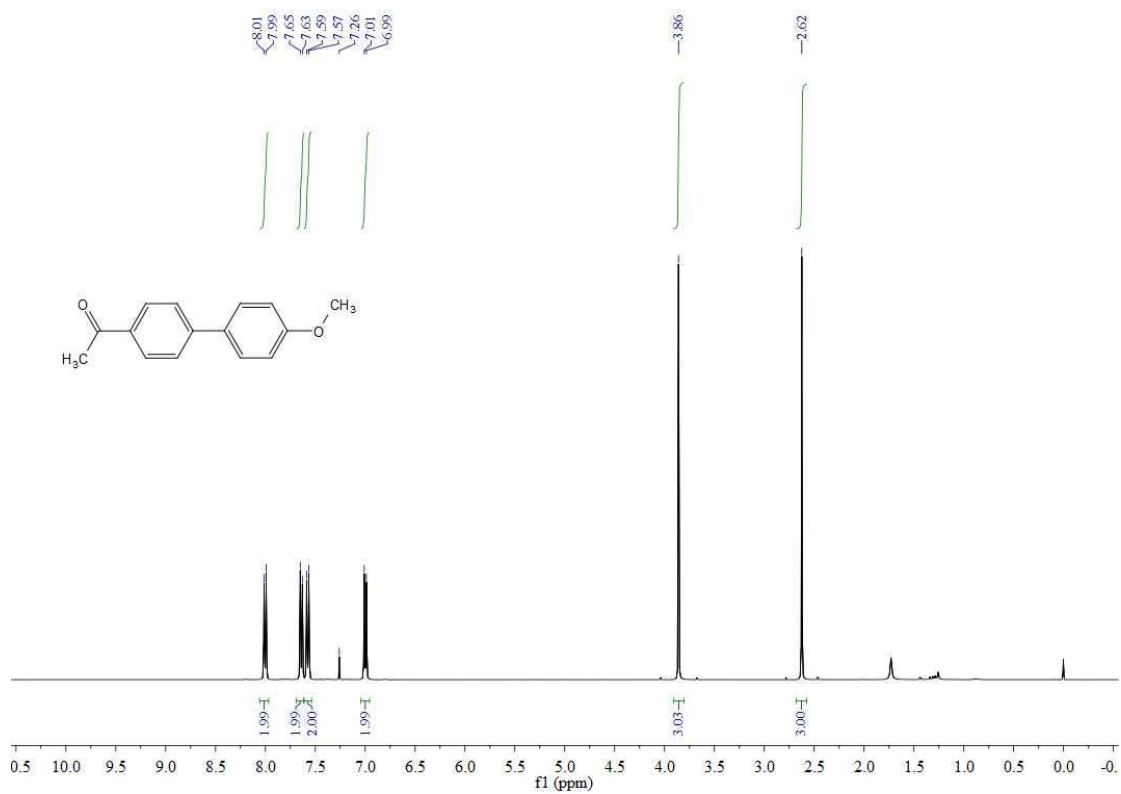

## <sup>13</sup>C NMR

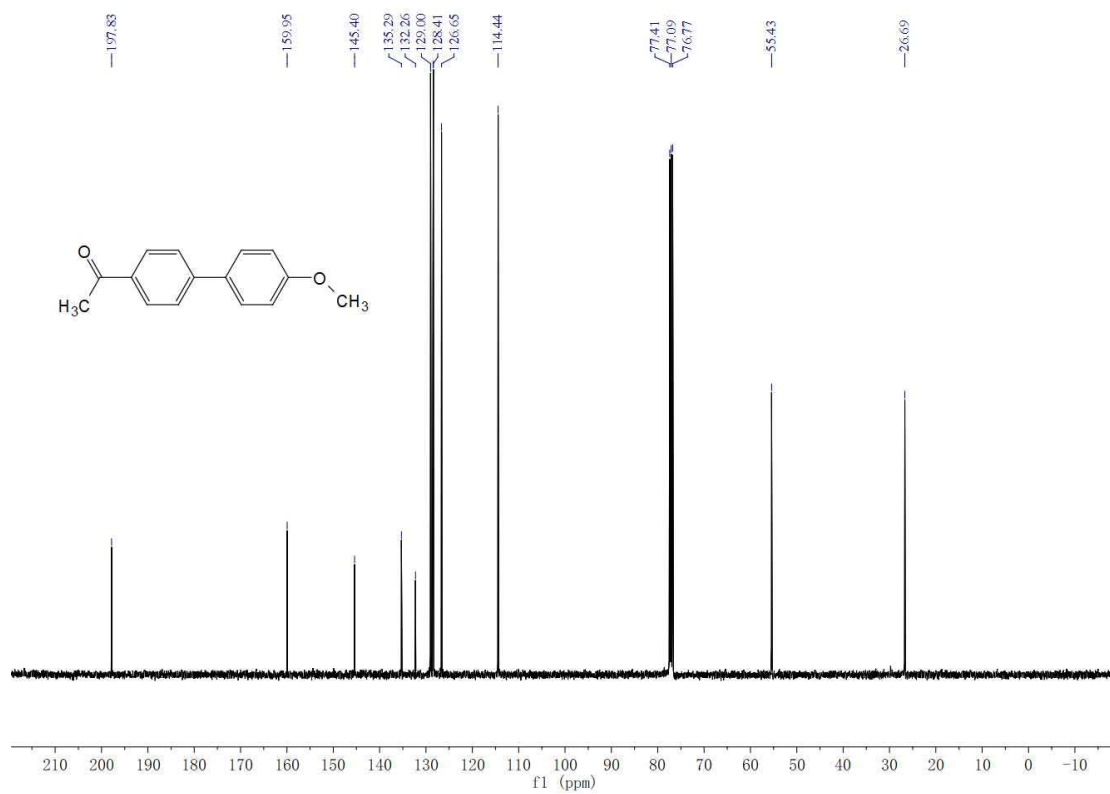

# 4-Acetyl-4'-fluorobiphenyl 3ae

## <sup>1</sup>H NMR

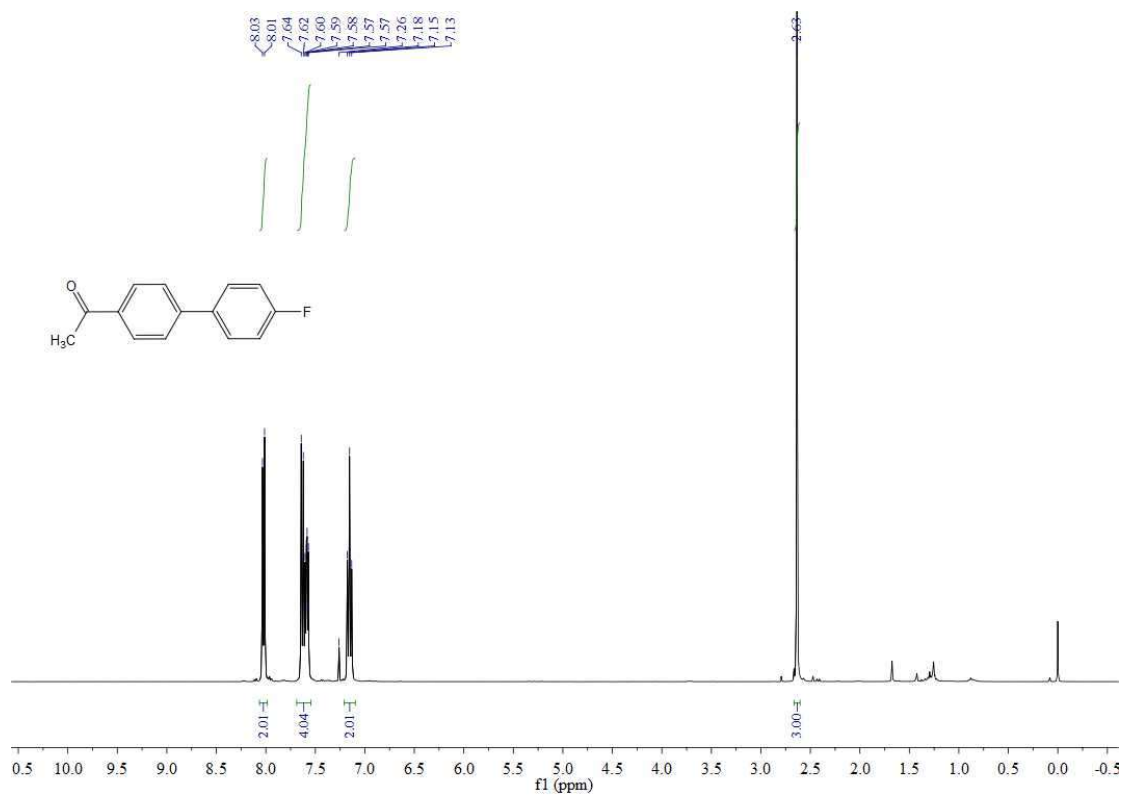

## <sup>13</sup>C NMR

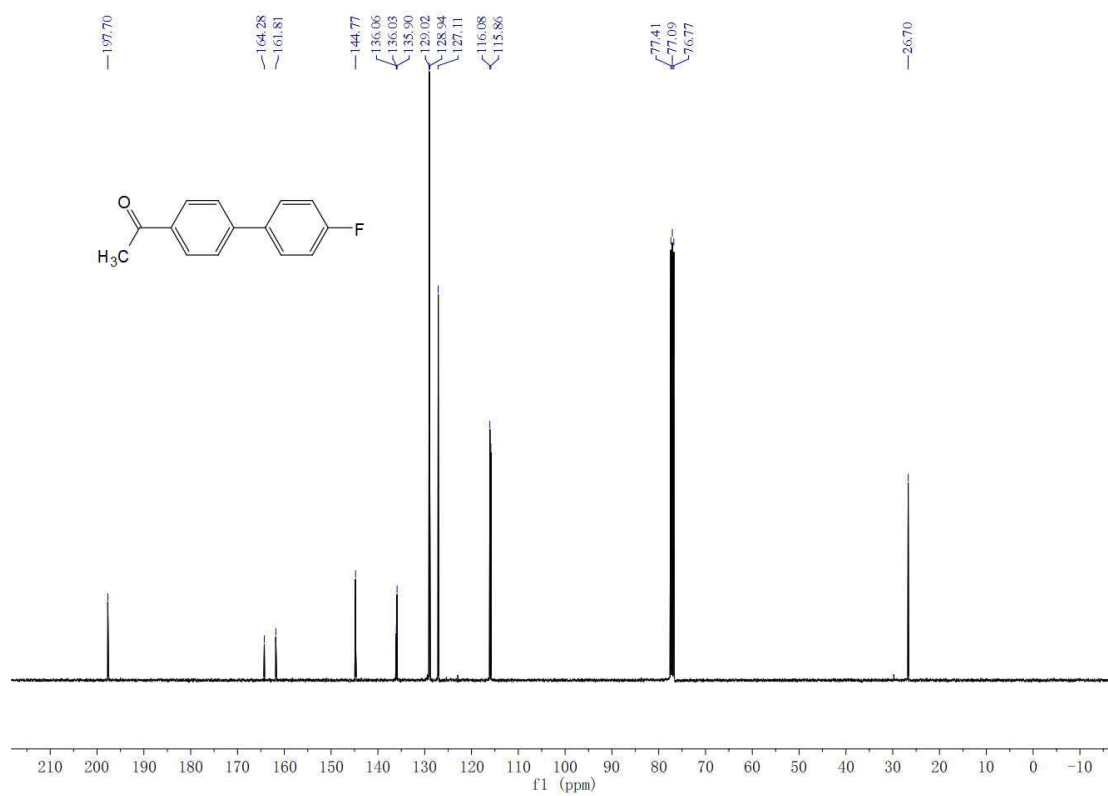

# 4-Acetyl-4'-trifluoromethylbiphenyl 3af

## <sup>1</sup>H NMR

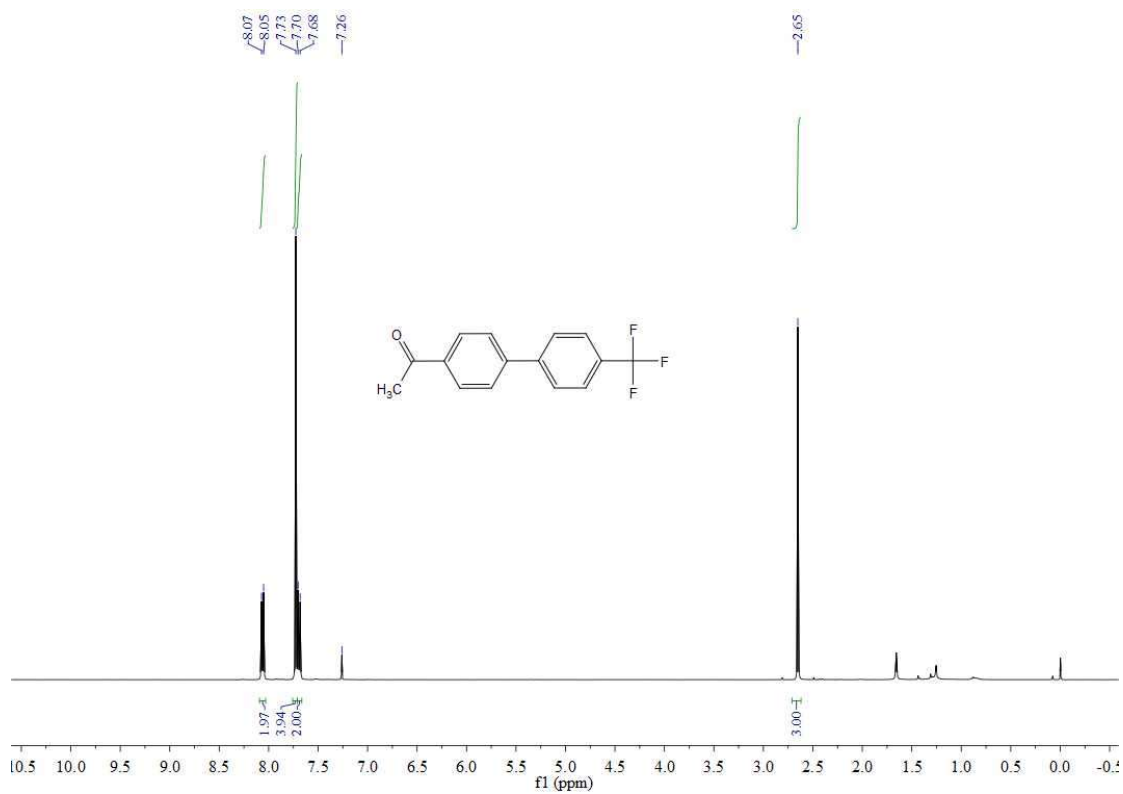

## <sup>13</sup>C NMR

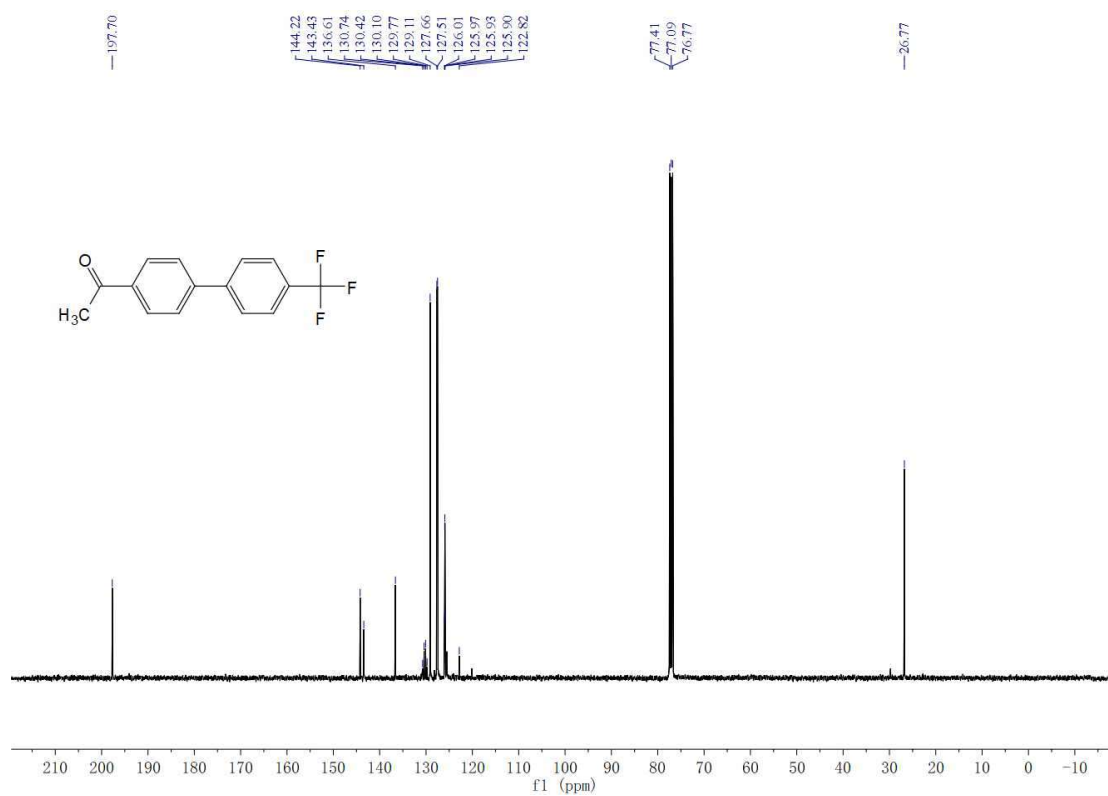

# 4-Acetyl-4'-formylbiphenyl 3ag

## <sup>1</sup>H NMR

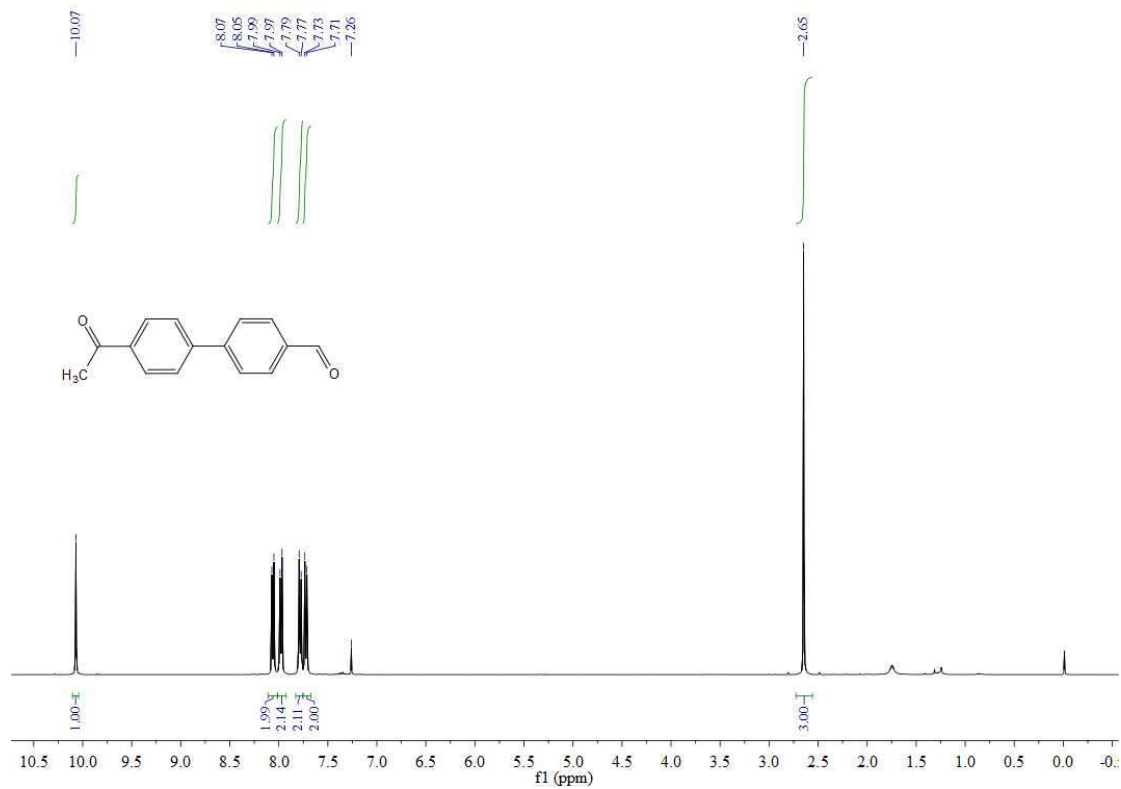

## <sup>13</sup>C NMR

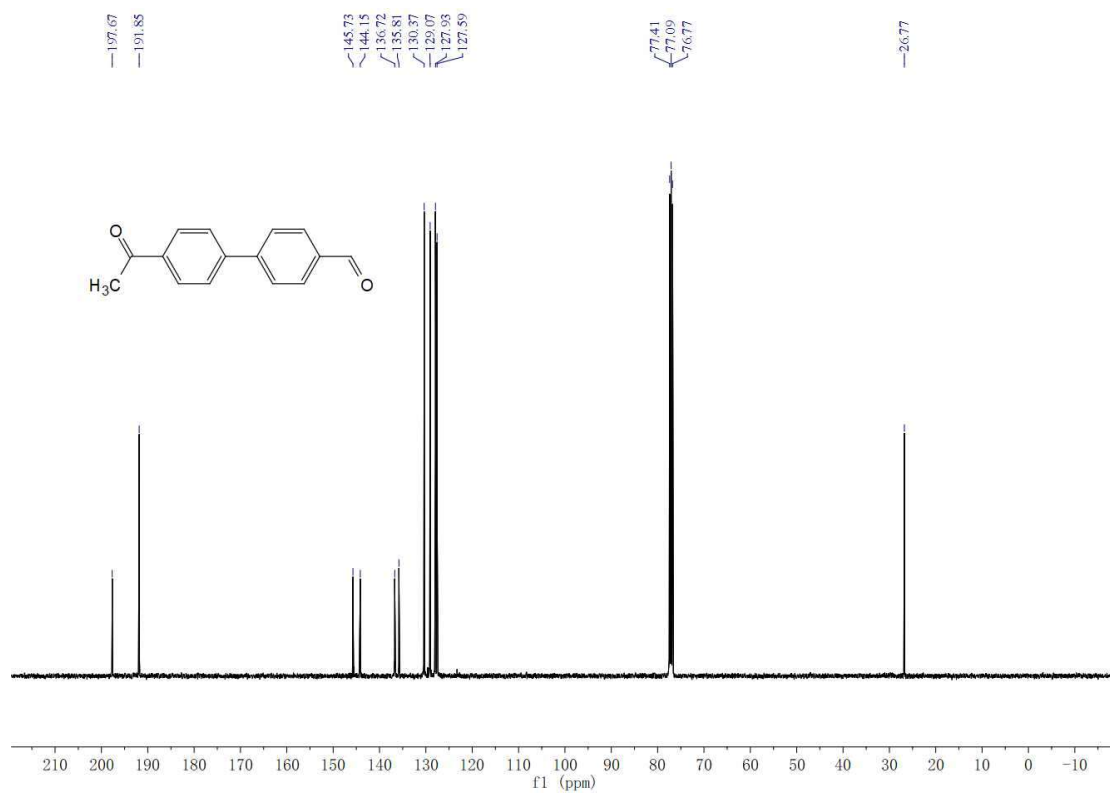



# 4-Acetyl-2'-ethylbiphenyl 3ah

## <sup>1</sup>H NMR

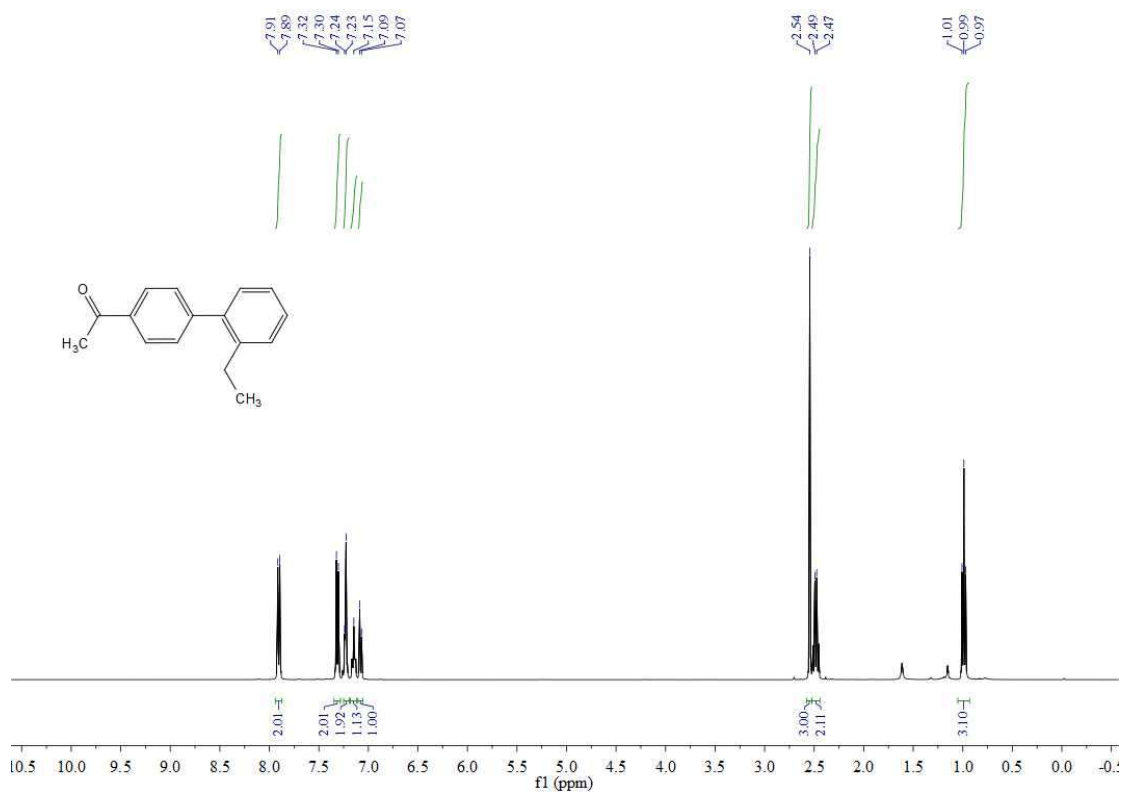

## <sup>13</sup>C NMR

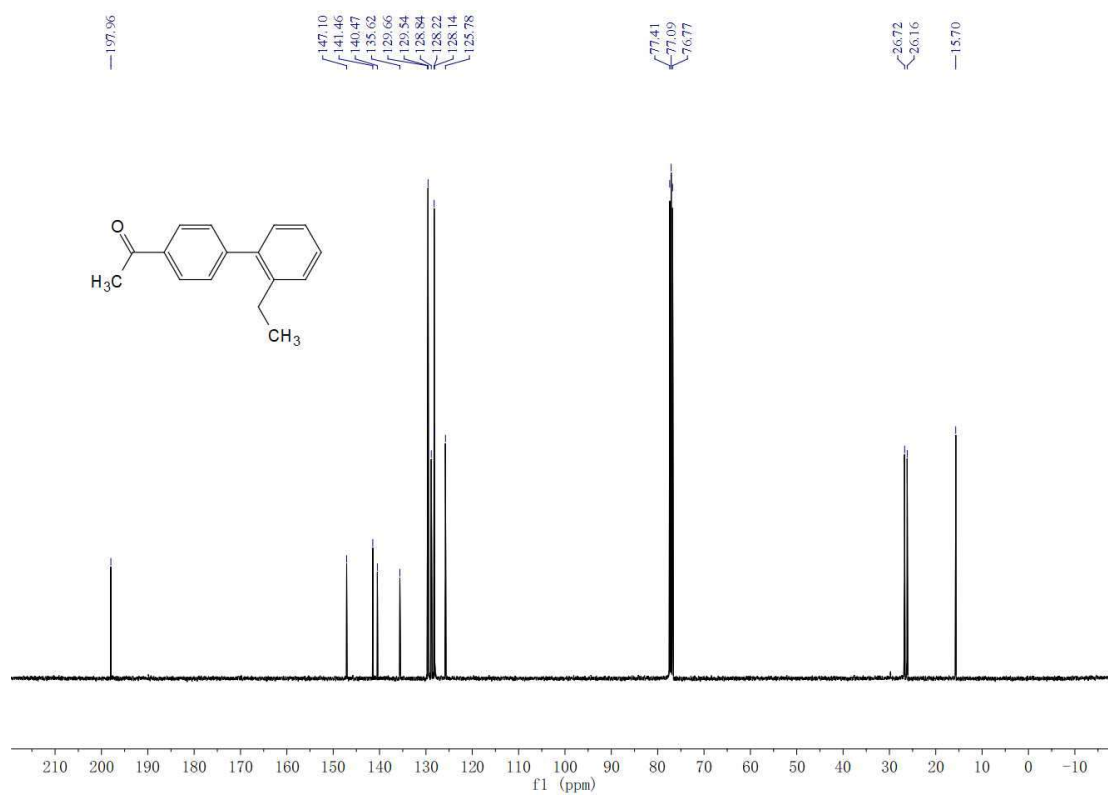

# 4-Acetyl-2'-isopropylbiphenyl 3ai

## <sup>1</sup>H NMR

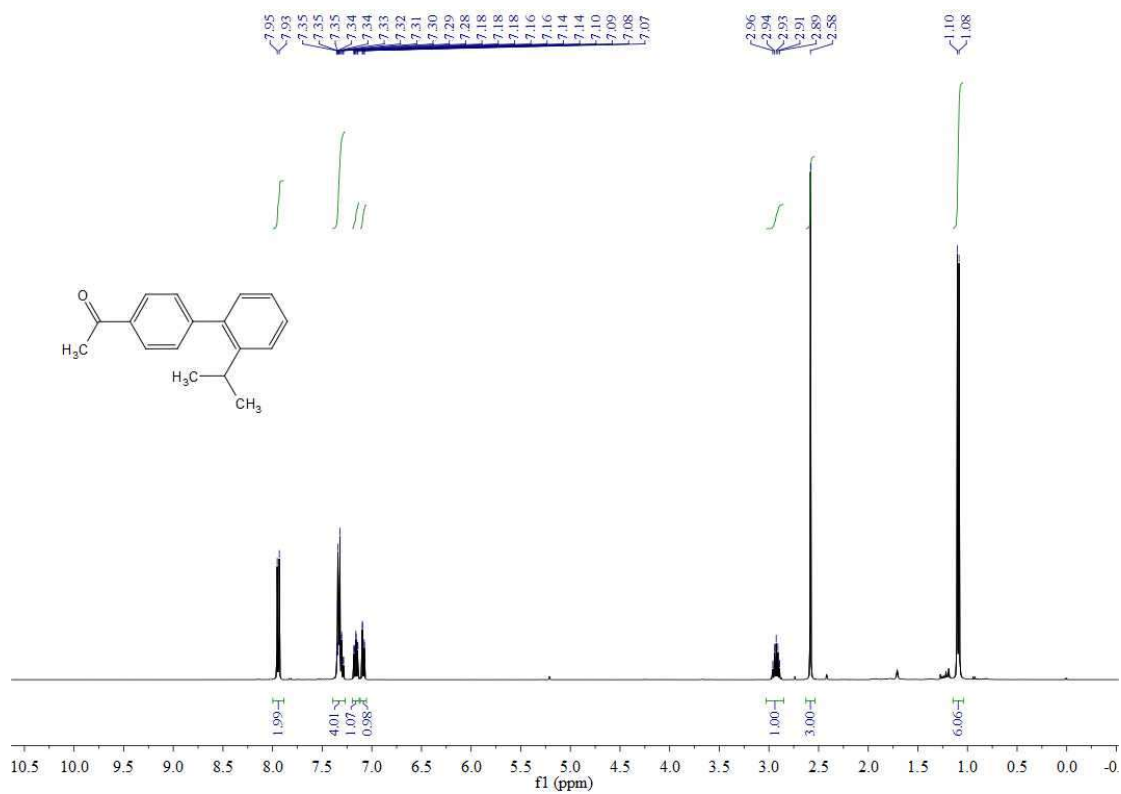

## <sup>13</sup>C NMR

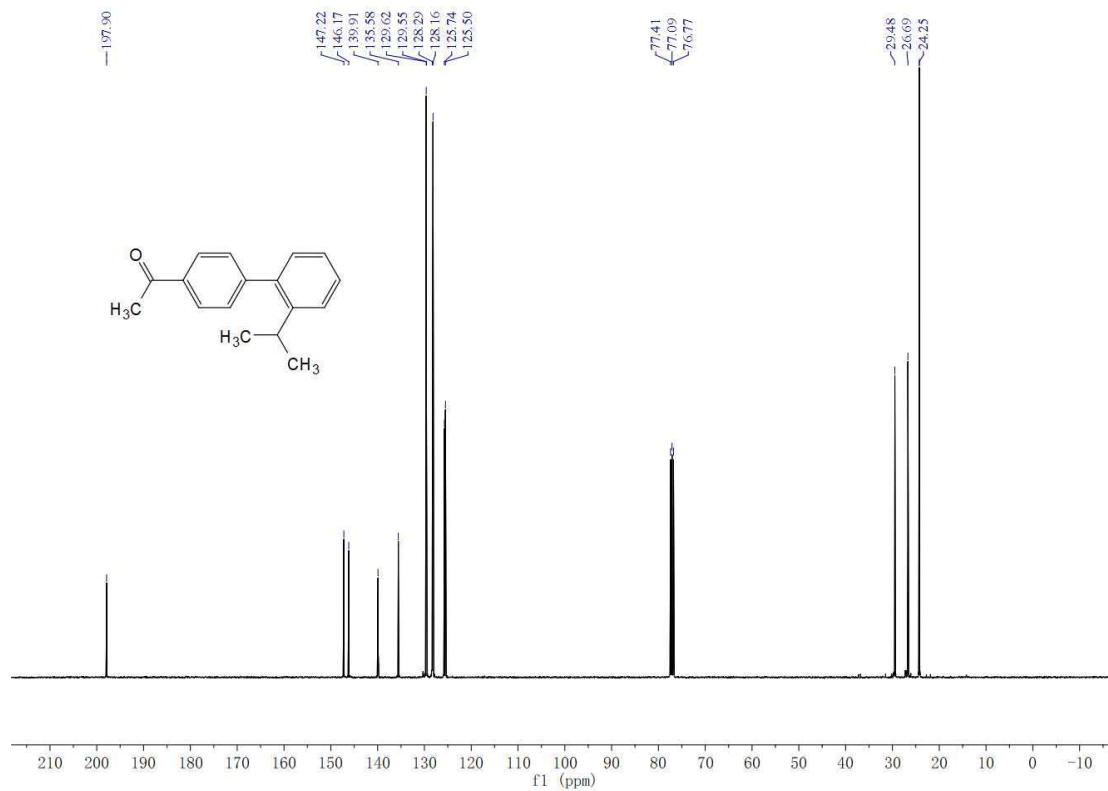

# 4-Acetylphenyl-2-phenylbenzene 3aj

## <sup>1</sup>H NMR

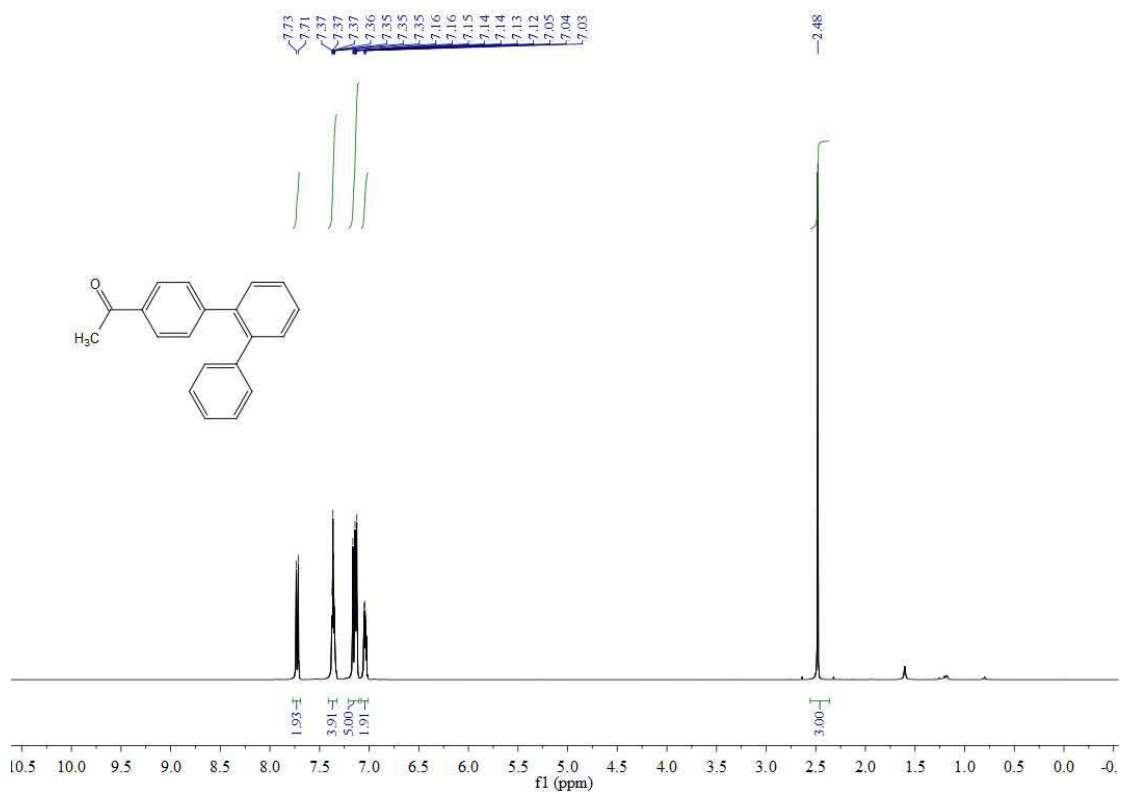

## <sup>13</sup>C NMR

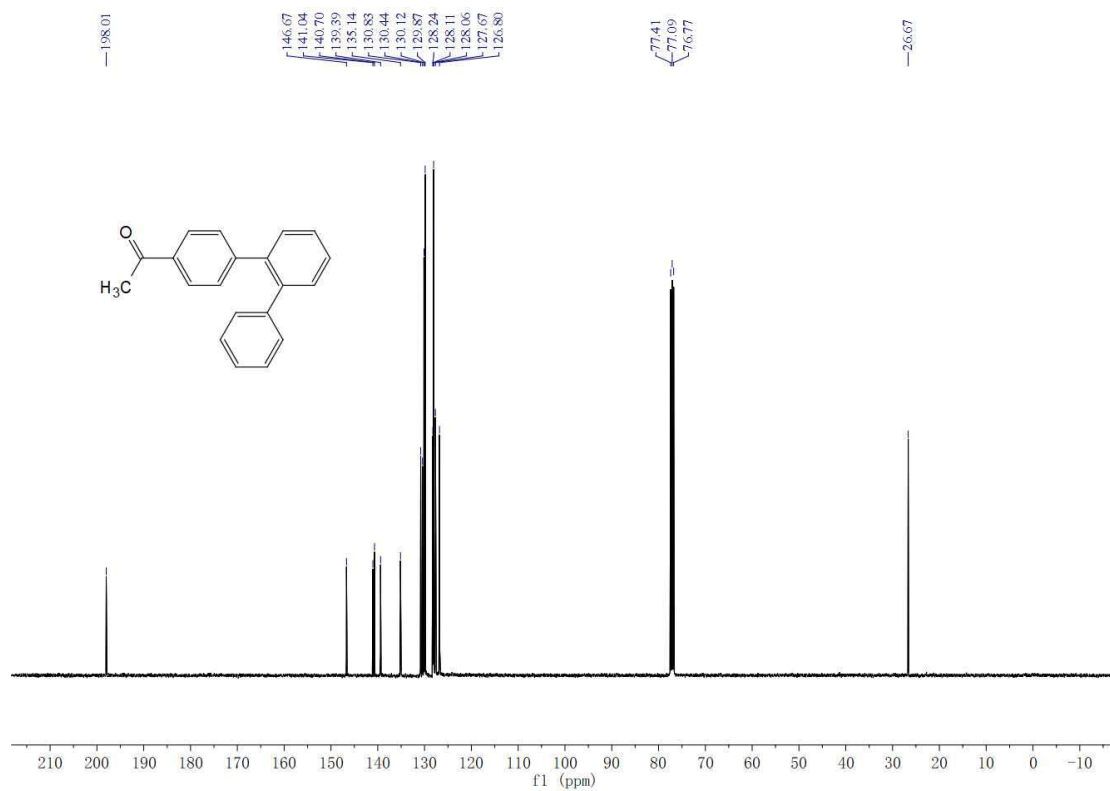

# 4-Acetyl-2'-formylbiphenyl 3ak

## <sup>1</sup>H NMR

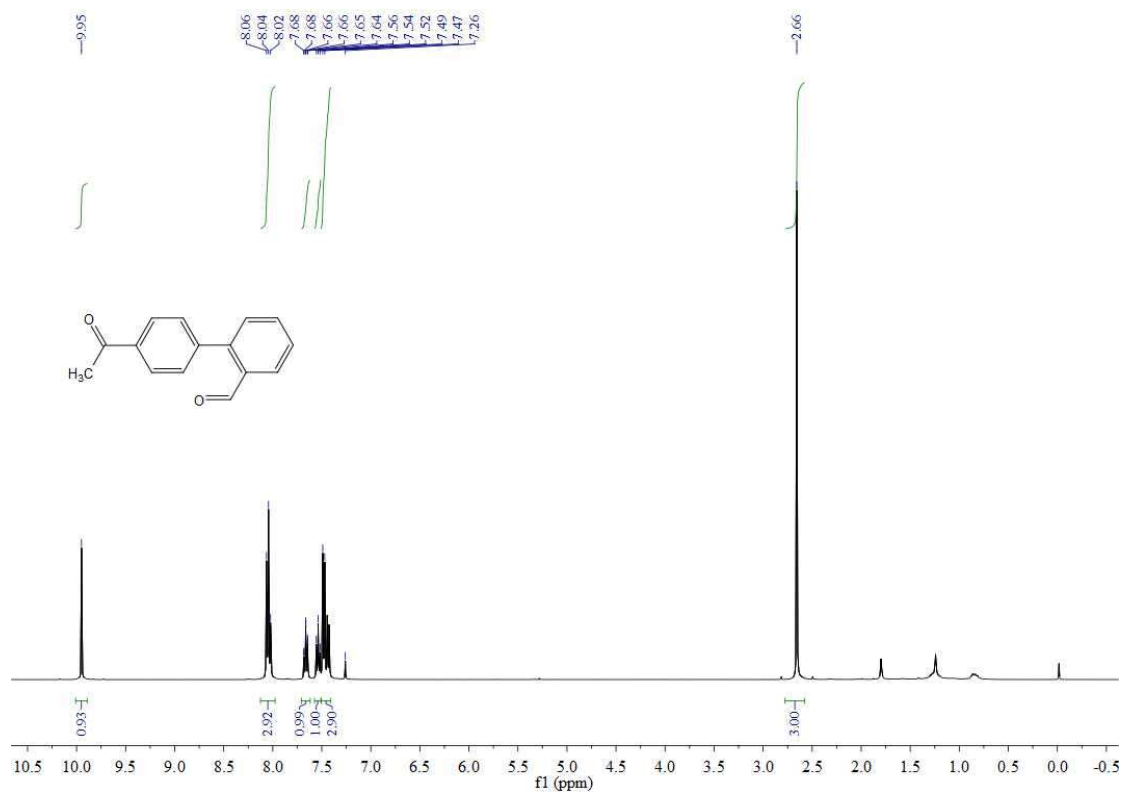

## <sup>13</sup>C NMR

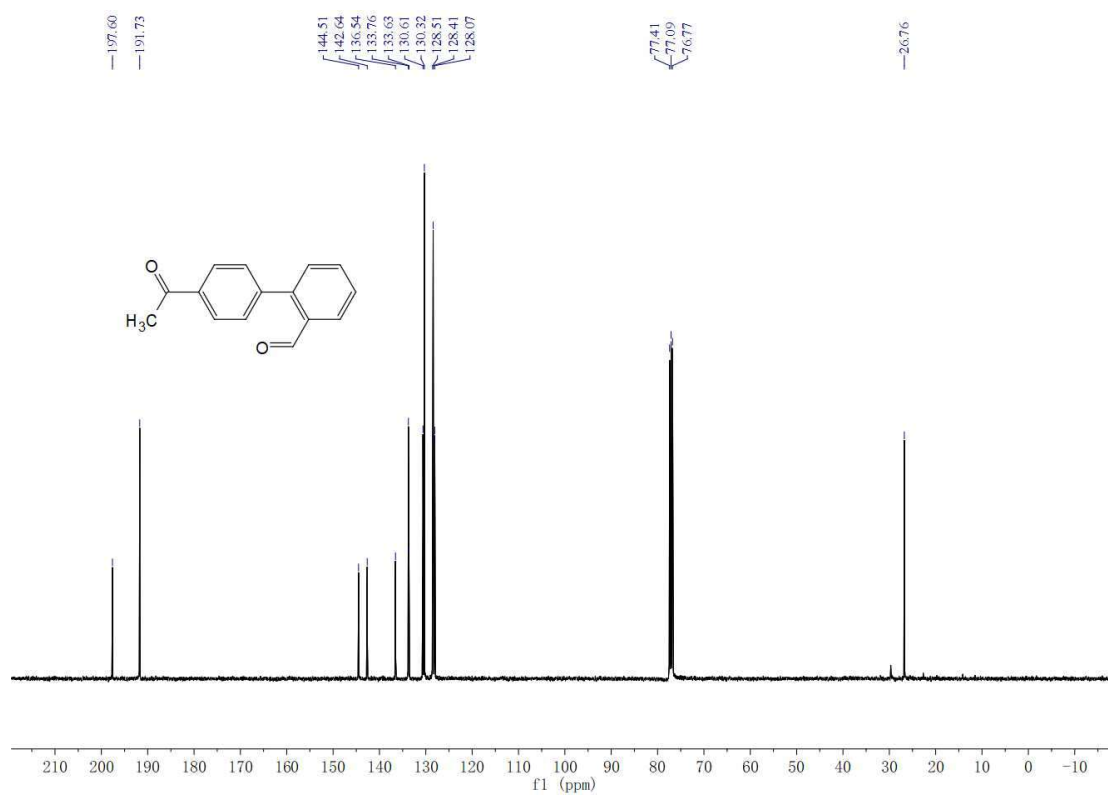

# 4-(2'-Thienyl)acetophenone 3aI

## <sup>1</sup>H NMR

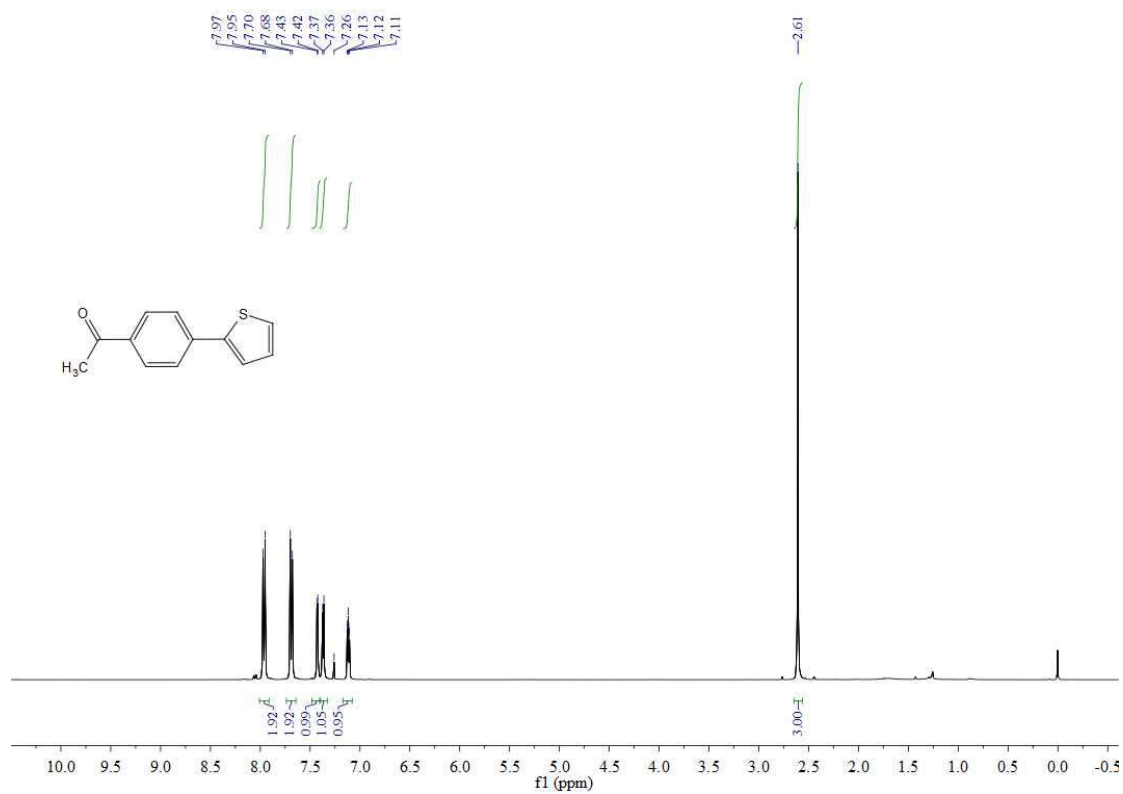

## <sup>13</sup>C NMR

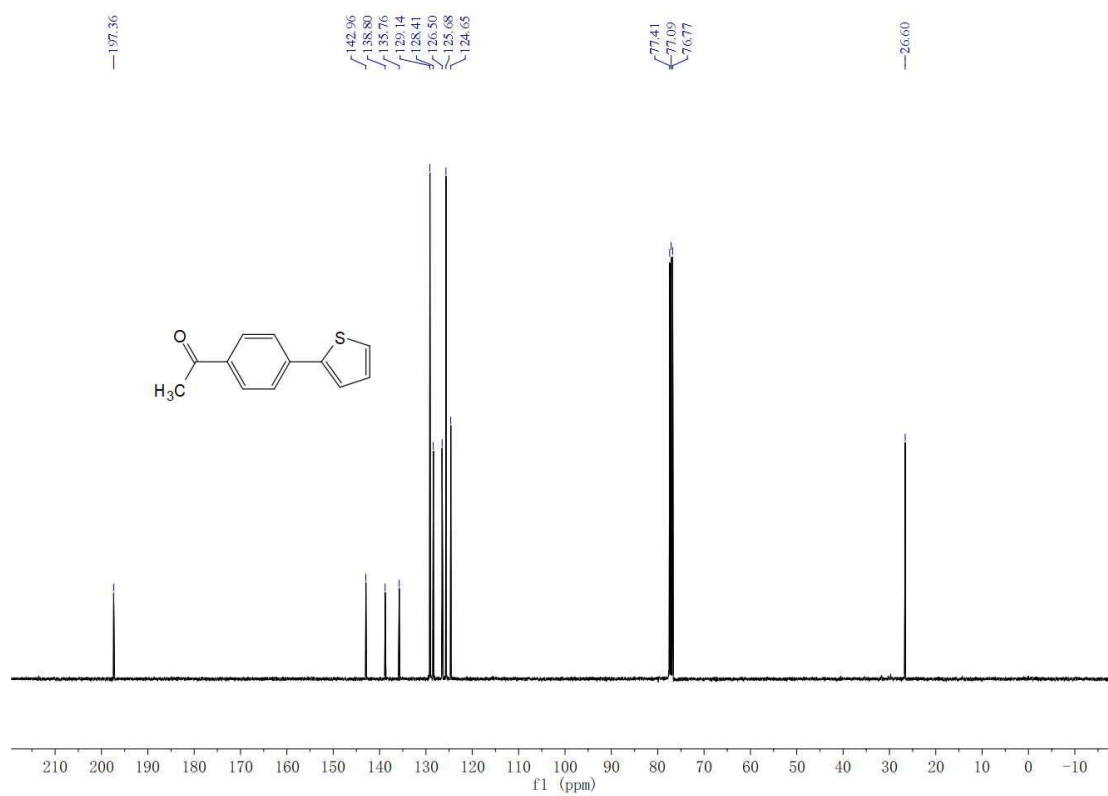

# 4-(3'-Furyl)acetophenone 3am

## <sup>1</sup>H NMR

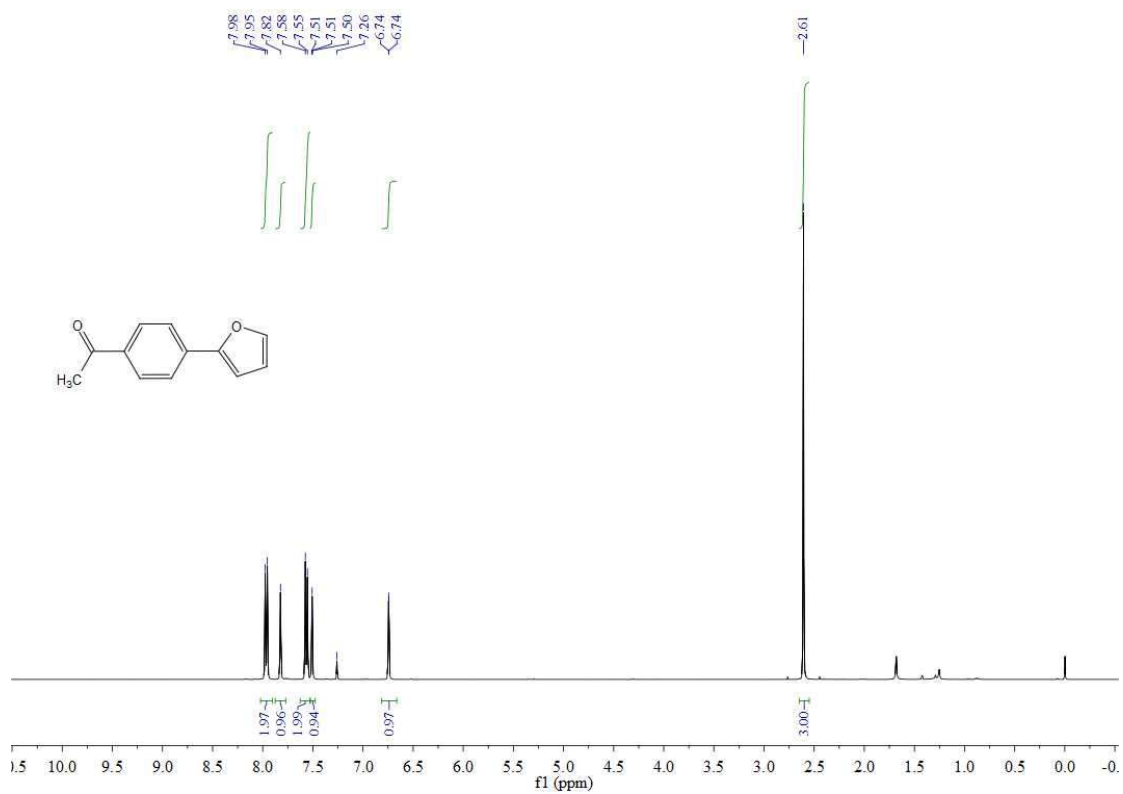

## <sup>13</sup>C NMR

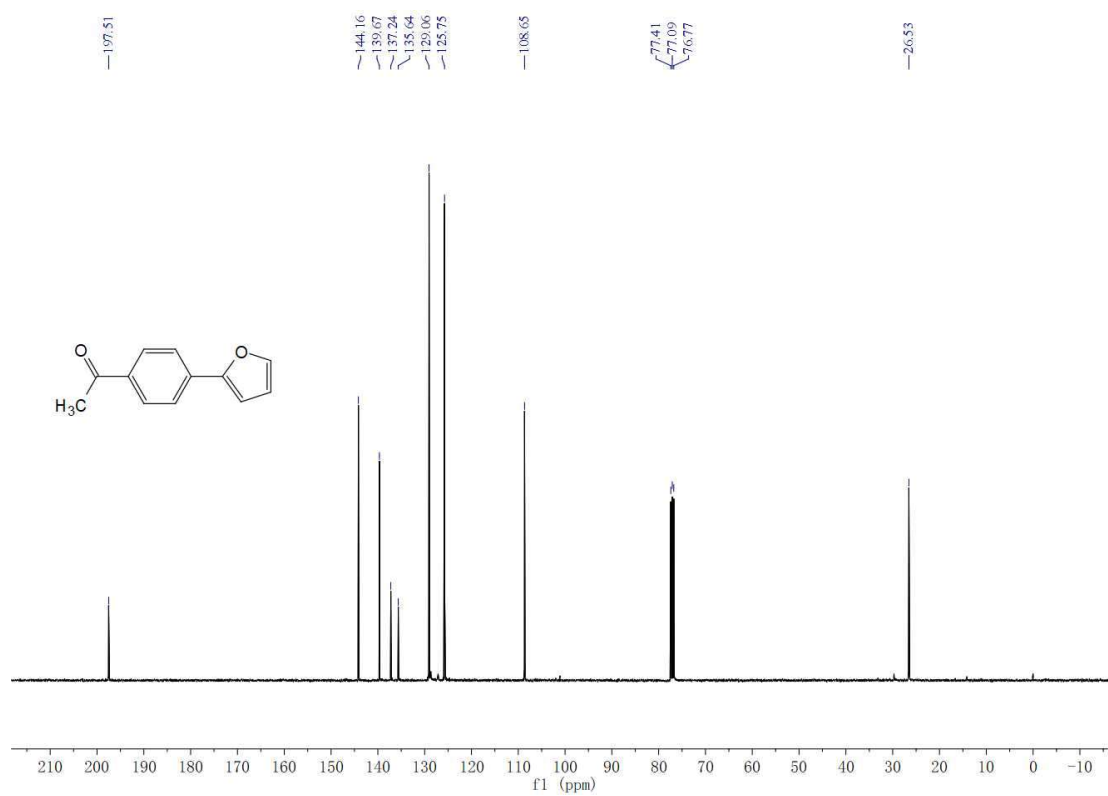

## 4-Tosyloxybiphenyl

Y12202013-3

20221256 345 (5.750) Cm (345-(13+65))

Waters GCT Premier

TOF MS EI+  
1.94e4

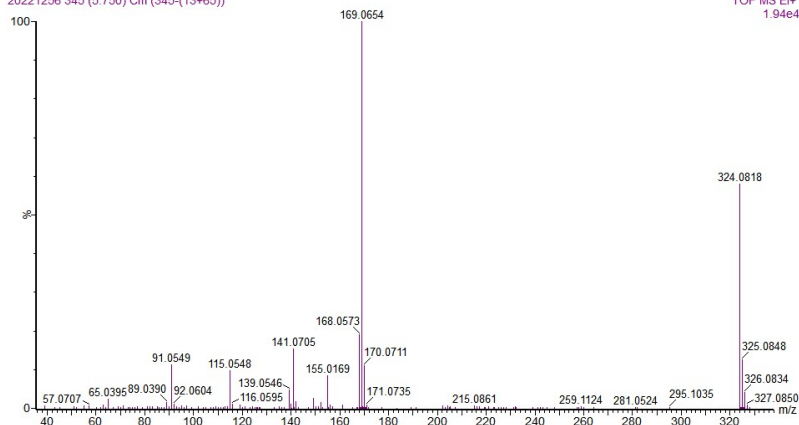

Supplement: s1 [file s1]
